# Supplementary material for: The influence of passenger load, driving cycle, fuel price and different types of buses on the cost of transport service in the BRT system in Curitiba, Brazil
Source: Springer Nature journal article supplement (doi:10.1007/s11116-018-9925-0), 2018-09-20
Supplement: MOESM1 [file 16141516]

## Sheet: BASIC INFORMATION
BASIC INFORMATION
Article title:		The influence of passenger load, driving cycle, fuel price and different types of buses on the cost of transport service in the BRT system in Curitiba, Brazil
Journal name:		Transportation
Author names:		Dennis Dreier (a,*), Semida Silveira (a), Dilip Khatiwada (a), Keiko V.O. Fonseca (b), Rafael Nieweglowski (c), Renan Schepanski (c)
Affiliation:		(a) KTH Royal Institute of Technology, Department of Energy Technology, Brinellvägen 68, SE-10044, Stockholm, Sweden (b) Federal University of Technology – Paraná (UTFPR), Curitiba, Brazil (c) Volvo Bus Corporation, Curitiba, Brazil
*Corresponding author:		E-Mail address: ddreier@kth.se

## Sheet: BUSES
BUSES
This sheet contains the input data for the vehicle (bus) models that were simulated in ADVISOR.
TABLE B1
TECHNICAL SPECIFICATIONS OF THE BUSES
Category	Parameter	ConvBi	HybTw	HybAr	PlugTw
General	Powertrain	Conventional	Hybrid-electric	Hybrid-electric	Plug-in hybrid-electric
	Chassis	Bi-articulated	Two-axle	Articulated	Two-axle
	PCC a (passengers)	250	79	154	96 a
	External energy source/s	Biodiesel blend	Biodiesel blend	Biodiesel blend	Biodiesel blend, Electrical energy
Geometry	Chassis length (m)	25	11.5	18.1	12
	Height (m)	3.16	2.79	2.95	2.95
	Frontal area (m2)	8.22	7.09	7.52	7.52
	Front weight fraction (-)	0.19	0.39	0.24	0.37
	Drag coefficient (-)	0.7	0.7	0.7	0.7
Internal combustion engine	Max. engine power (kWp)	250	161	177	177
	Max. engine power at (rpm)	1800	2300	2200	2200
	Max. engine torque (Nm)	1700	800	918	918
	Max. engine torque at (rpm)	950–1400	1200–1700	1200–1600	1200–1600
	Max. engine speed (rpm)	2100	2650	2650	2650
	Idle speed (rpm)	600	700	500	500
	Engine displacement (L)	12.1	4.8	5.1	5.1
	Peak efficiency (%) c	43	43	43	43
Transmission and axle	Transmission	Automatic	Automatic	Automatic	Automatic
	Forward gears	7	12	12	12
	Gear ratios	7.090/3.364/1.909/1.421/1.000/0.720/0.615	14.94/11.73/9.04/7.09/5.54/4.35/3.44/2.70/2.08/1.63/1.27/1.00	14.94/11.73/9.04/7.09/5.54/4.35/3.44/2.70/2.08/1.63/1.27/1.00	14.94/11.73/9.04/7.09/5.54/4.35/3.44/2.70/2.08/1.63/1.27/1.00
	Wheel radius (m)	0.522	0.522	0.481	0.481
	Final drive ratio	7.21:1	4.63:1	4.72:1	4.72:1
	Rolling resistance (-)	0.01	0.01	0.01	0.01
Electric motor	Type	-	Permanent magnet	Permanent magnet	Permanent magnet
	Max. motor power (kWp)	-	120	150	150
	Max. motor torque (Nm)	-	800	1200	1200
	Peak efficiency (%) c	-	93	93	93
Energy storage system	Type	-	Lithium-Ion	Lithium-Ion	Lithium-Ion
	Voltage (V)	-	600	600	600
	Usable capacity (kWh)	-	1.2	2.4	8.5
Mechanical accessory loads b	Steering (kW)	0.269	0.269	0.269	0.269
	Cooling (kW)	3.511	3.511	3.511	3.511
	Compressor (kW)	1.166	1.166	1.166	1.166
Electrical accessory loads b	24V-Devices (kW)	4.093	4.093	4.093	4.093
Sources		(Volvo Bus Corporation 2015a, b; Dreier et al. 2018)	(Volvo Bus Corporation 2015c, d, 2018; Dreier et al. 2018)	(Volvo Bus Corporation 2015e, 2016c; Dreier et al. 2018)	(Volvo Bus Corporation 2015f, e; Volvo Group 2015; Dreier et al. 2018)
a Passenger carrying capacity (PCC) is according to Ref. (Volvo Bus Corporation 2015f, 2016c; URBS 2017a). PlugTw: PCC is a mean value of two configurations that can carry either 90 or 102 passengers (Volvo Bus Corporation 2016c).
b Mechanical and electrical accessory loads were assumed to be the same for the buses. No mechanical accessory loads occurred during all-electric drive. Values were retrieved from Ref. (Andersson 2004).
c Values calculated by ADVISOR.
TABLE B2
TOTAL WEIGHT OF BUSES AT DIFFERENT OCCUPANCY RATES
Bus	Passenger carrying capacity	Total weight of a bus at occupancy rate (in tonnes)
		0	0.2	0.4	0.6	0.8	1
ConvBi	250	23.75	27.1	30.45	33.8	37.15	40.5
HybTw	79	13.81	14.87	15.92	16.98	18.04	19.1
HybAr	154	18.68	20.75	22.81	24.87	26.94	29
PlugTw	96	12.64	13.91	15.18	16.45	17.73	19
Fig. B1 Characteristics of the internal combustion engines: (a) engine power and (b) engine torque
Note: ICE-2 for ConvBi; ICE-3 for HybTw; ICE-4 for HybAr and PlugTw
Figure source: (Dreier et al. 2018)

## Sheet: DRIVING CYCLES
DRIVING CYCLES
This sheet contains a summary and graphical presentation of the driving cyces that were simulated in ADVISOR.
TABLE B3
CHARACTERISTICS OF THE DRIVING CYCLES
Driving cycle (DC)	1	2	3	4	5	6	7	8	9	10	11
Duration (s)	1878	1960	1711	1889	1705	1650	1818	1717	1638	1897	1694
Average speed (km/h)	19.24	18.48	21.36	19.11	21.11	21.91	19.9	20.99	22.07	19.02	21.38
Distance (km)	10.0369	10.0613	10.1519	10.0274	9.99793	10.0421	10.0495	10.0111	10.0419	10.0225	10.0605
Max. speed (km/h)	60.99	57.94	60.03	55.04	59.06	60.99	59.06	60.03	57.94	57.94	65.02
Max. acceleration (m/s2)	1.12	0.89	1.25	0.97	1.12	0.98	1.12	1.12	1.12	1.12	1.12
Max. deceleration (m/s2)	-2.08	-2.5	-2.37	-2.22	-3.06	-2.5	-2.48	-3.06	-2.93	-2.37	-2.91
Average acceleration (m/s2)	0.25	0.22	0.24	0.23	0.26	0.24	0.22	0.26	0.28	0.21	0.26
Average deceleration (m/s2)	-0.47	-0.44	-0.5	-0.43	-0.61	-0.56	-0.54	-0.78	-0.59	-0.57	-0.59
Measurement frequency (Hz)	0.1	0.09	0.1	0.09	0.1	0.1	0.09	0.11	0.11	0.09	0.1
Uncertainty of distance (km)	Mean	10.0457
	S.D.	0.0402773
Fig. B2 BRT route ‘503’ in Curitiba: driving cycles of eleven conventional bi-articulated buses. Data source: (URBS 2015a)

## Sheet: FUEL PRICES
FUEL PRICES OF BIODIESEL BLEND AND ELECTRICAL ENERGY
This sheet contains the data for both fuel prices and currency exchange rate.
TABLE B4
FUEL PRICES 2014-2017
Fuel	Unit	Year	Month
			Jan	Feb	Mar	Apr	May	Jun	Jul	Aug	Sep	Oct	Nov	Dec
Biodiesel blend	BRL/L	2014	2.539	2.54	2.546	2.549	2.556	2.549	2.556	2.547	2.571	2.576	2.584	2.646
		2015	2.653	2.811	2.823	2.823	2.815	2.817	2.812	2.823	2.823	2.897	2.908	2.906
		2016	2.916	2.92	2.954	2.931	2.92	2.91	2.914	2.91	2.911	2.908	2.892	2.91
		2017	2.962	3.005	2.961	2.952	2.905	2.867	2.879	2.993	3.109	3.158	3.176	3.224
Electrical energy	BRL/kWh	2014	0.37262	0.37121	0.37297	0.37416	0.39558	0.4006	0.3996	0.41267	0.42651	0.43753	0.43932	0.44381
		2015	0.45622	0.48229	0.53443	0.59538	0.61901	0.61639	0.62701	0.61925	0.62311	0.6288	0.6299	0.63952
		2016	0.65029	0.65349	0.6405	0.62491	0.63417	0.63719	0.62826	0.61535	0.63099	0.62785	0.61827	0.61303
		2017	0.60649	0.60328	0.61875	0.60142	0.60445	0.63495	0.63031	0.64849	0.65052	0.66215	0.69032	0.68431
Sources: Biodiesel blend: (ANP 2018); Electrical energy: (ANEEL 2018)
Coefficient of correlation between fuel prices of biodiesel blend and electrical energy:	0.923
TABLE B5
CURRENCY EXCHANGE RATE BETWEEN BRL AND USD 2014-2017
	Unit	Year	Month
			Jan	Feb	Mar	Apr	May	Jun	Jul	Aug	Sep	Oct	Nov	Dec
Exchange rate	USD/BRL	2014	0.308565	0.30736	0.310672	0.324245	0.327816	0.329304	0.332193	0.331192	0.332698	0.322396	0.314851	0.306969
		2015	0.325943	0.313365	0.294298	0.303567	0.293536	0.28605	0.28318	0.256536	0.228683	0.229996	0.24573	0.236698
		2016	0.227656	0.226876	0.242953	0.247874	0.250297	0.258949	0.276213	0.278258	0.274345	0.283437	0.276661	0.28237
		2017	0.294142	0.302288	0.292402	0.297437	0.282486	0.270547	0.270425	0.268328	0.268074	0.266909	0.26113	0.256262
Weight	days/month		31	28	31	30	31	30	31	31	30	31	30	31
Source: (X-rates 2018)
Weighted mean exchange rate (2014-2017) between USD/BRL:	0.283316
TABLE B6
FUEL PRICES 2014-2017
Fuel	Unit	Year	Month
			Jan	Feb	Mar	Apr	May	Jun	Jul	Aug	Sep	Oct	Nov	Dec
Biodiesel blend	USD/L	2014	0.719338	0.719622	0.721322	0.722171	0.724155	0.722171	0.724155	0.721605	0.728404	0.729821	0.732088	0.749653
		2015	0.751636	0.7964	0.7998	0.7998	0.797533	0.7981	0.796683	0.7998	0.7998	0.820765	0.823882	0.823315
		2016	0.826148	0.827282	0.836914	0.830398	0.827282	0.824448	0.825582	0.824448	0.824732	0.823882	0.819349	0.824448
		2017	0.839181	0.851363	0.838897	0.836348	0.823032	0.812266	0.815666	0.847964	0.880828	0.894711	0.89981	0.913409
Electrical energy	USD/kWh	2014	0.105569	0.10517	0.105668	0.106005	0.112074	0.113496	0.113213	0.116916	0.120837	0.123959	0.124466	0.125738
		2015	0.129254	0.13664	0.151412	0.16868	0.175375	0.174633	0.177642	0.175443	0.176537	0.178149	0.17846	0.181186
		2016	0.184237	0.185144	0.181464	0.177047	0.17967	0.180526	0.177996	0.174338	0.178769	0.17788	0.175166	0.173681
		2017	0.171828	0.170919	0.175302	0.170392	0.17125	0.179891	0.178577	0.183727	0.184302	0.187597	0.195578	0.193876
TABLE B7
FUEL PROPERTIES
Fuel	Unit	Density	LHV	LHV
		kg/L	MJ/kg	MJ/L
Petroleum diesel		0.8537	42.64	36.4018
Biodiesel B100		0.8814	37.388	32.9538
Biodiesel blend		0.855639	42.2724	36.1699
Values for biodiesel blend were calculated based on the volumetric shares between 93% petroleum diesel and 7% biodiesel.
Source: (Canakci and van Gerpen 2003)
TABLE B8
DESCRIPTIVE STATISTICS OF THE FUEL PRICES OF BIODIESEL BLEND AND ELECTRICAL ENERGY 2015-2017
Fuel	Unit	N	Mean	S.D.	CV (%)	Min	Q25	Median	Q75	Max	Skew. (-)	Kurt. (-)
Biodiesel blend	USD/L	48	0.801883	0.05196	6.47975	0.719338	0.75114	0.820057	0.827282	0.913409	-0.202951	-0.532791
Electrical energy	USD/kWh	48	0.160118	0.0291137	18.1826	0.10517	0.128375	0.175234	0.178995	0.195578	-0.898087	-0.878049
Biodiesel blend	USD/MJ		0.0221699	0.00143656	6.47975	0.0198878	0.020767	0.0226724	0.0228721	0.0252533
Electrical energy	USD/MJ		0.0444773	0.00808713	18.1826	0.0292138	0.0356598	0.048676	0.0497207	0.0543273
Conversion factor for electrical energy unit:	3.6	MJ/kWh

## Sheet: TOTAL ENERGY USE
TOTAL ENERGY USE
This sheet contains the total energy use data that was obtained from ADVISOR.
Table B9
Total energy use of the buses.
ConvBi: Total energy use (MJ)
Occupancy rate	Driving cycles
	DC-1	DC-2	DC-3	DC-4	DC-5	DC-6	DC-7	DC-8	DC-9	DC-10	DC-11
0	261.962	239.158	237.961	238.753	251.248	240.407	256.262	263.291	269.724	246.152	244.973
0.2	289.162	263.708	264.356	263.822	277.143	268.626	284.903	293.324	299.548	272.211	271.13
0.4	312.347	289.766	287.198	287.286	301.938	294.635	310.831	323.057	327.063	297.868	296.583
0.6	334.328	314.92	305.776	308.544	325.333	319.137	332.739	350.387	350.862	318.414	321.734
0.8	356.409	335.344	325.166	328.198	350.627	337.213	354.044	372.812	369.54	336.054	344.37
1	376.182	354.26	345.876	350.058	370.223	356.594	375.851	392.734	389.021	357.101	364.994
HybTw: Total energy use (MJ)
Occupancy rate	Driving cycles
	DC-1	DC-2	DC-3	DC-4	DC-5	DC-6	DC-7	DC-8	DC-9	DC-10	DC-11
0	120.744	103.934	112.483	100.074	110.677	117.392	123.81	128.242	129.942	110.247	113.985
0.2	127.067	110.272	117.559	105.689	116.376	123.718	130.844	136.05	138.075	116.461	120.122
0.4	132.988	115.705	121.823	110.603	121.375	130.045	136.673	142.758	145.105	121.773	125.957
0.6	138.107	120.535	125.985	114.914	127.274	136.07	142.2	149.665	151.23	126.584	131.49
0.8	142.323	125.163	129.945	119.226	131.873	141.895	147.125	155.171	157.858	130.593	136.621
1	146.538	128.785	134.006	123.137	136.672	148.522	151.647	160.978	163.582	134.301	140.645
HybAr: Total energy use (MJ)
Occupancy rate	Driving cycles
	DC-1	DC-2	DC-3	DC-4	DC-5	DC-6	DC-7	DC-8	DC-9	DC-10	DC-11
0	140.817	122.346	130.757	117.822	128.973	136.572	144.612	150.266	151.331	129.29	133.201
0.2	149.75	131.099	137.965	125.945	137.472	146.514	154.762	161.078	161.774	137.809	142.758
0.4	157.177	138.142	143.65	132.663	144.47	155.251	162.098	170.488	171.314	144.725	151.008
0.6	163.099	144.581	149.639	138.579	151.069	163.485	168.631	178.898	179.347	150.638	158.05
0.8	167.917	149.914	155.02	143.693	157.567	170.314	174.761	186.006	185.473	155.549	164.288
1	172.534	155.146	160.807	148.406	163.166	176.942	178.479	191.512	191.096	160.059	170.022
PlugTw: Total biodiesel blend use (MJ)
Occupancy rate	Driving cycles
	DC-1	DC-2	DC-3	DC-4	DC-5	DC-6	DC-7	DC-8	DC-9	DC-10	DC-11
0	42.4781	20.5306	33.6887	18.9214	33.9663	39.0617	43.8122	48.0247	49.2349	30.4428	32.0995
0.2	52.0995	30.563	42.6688	28.2035	41.6542	48.9085	55.1323	58.5796	60.0326	40.8054	42.0396
0.4	60.8054	39.9666	50.06	36.2212	50.7549	58.654	65.2862	70.2666	70.7536	54.8507	50.5873
0.6	69.9032	47.8812	56.7241	43.2907	58.6485	67.3331	74.5432	80.1923	78.9247	56.5898	61.9695
0.8	77.0409	54.9651	61.9001	48.8483	64.0553	74.8008	83.7882	90.2018	87.0735	63.568	71.2455
1	81.97	62.43	65.6562	55.2549	69.3116	83.6652	87.7756	97.3513	94.6183	68.9608	77.1758
PlugTw: Total net electrical energy use (MJ)
Occupancy rate	Driving cycles
	DC-1	DC-2	DC-3	DC-4	DC-5	DC-6	DC-7	DC-8	DC-9	DC-10	DC-11
0	27	27	27	27	27	27	27	27	27	27	27
0.2	27	27	27	27	27	27	27	27	27	27	27
0.4	27	27	27	27	27	27	27	27	27	27	27
0.6	27	27	27	27	27	27	27	27	27	27	27
0.8	27	27	27	27	27	27	27	27	27	27	27
1	27	27	27	27	27	27	27	27	27	27	27
PlugTw: All-electric range (AER) of charge depleting (CD) mode (km)
Occupancy rate	Driving cycles
	DC-1	DC-2	DC-3	DC-4	DC-5	DC-6	DC-7	DC-8	DC-9	DC-10	DC-11
0	6.30941	7.95945	6.94387	8.03338	6.8266	6.52931	6.25964	6.03467	6.00829	7.11469	7.05687
0.2	5.80825	7.166	6.37758	7.27212	6.36616	5.95328	5.63804	5.53313	5.48835	6.40263	6.42082
0.4	5.42696	6.53161	6.00206	6.73569	5.84029	5.46381	5.1854	4.79593	5.00018	6.17176	5.84509
0.6	5.04459	6.078	5.6896	6.321	5.45099	5.10268	4.83847	4.67564	4.83151	5.60124	5.371
0.8	4.81154	5.73828	5.47602	6.05238	5.28566	4.83913	4.50231	4.33978	4.59807	5.29854	4.95925
1	4.71945	5.38124	5.37529	5.72669	5.11626	4.4966	4.50134	4.18458	4.41688	5.12708	4.79104

## Sheet: ENERGY USE AND FUEL COST
ENERGY USE AND FUEL COST
This sheet contains the results for the energy use and fuel cost estimations.
TABLE B10
ENERGY USE ESTIMATIONS. UNIT: MJ/km IF NOT OTHERWISE SPECIFIED
ConvBi
Occupancy rate (%)	Driving cycles
	DC-1	DC-2	DC-3	DC-4	DC-5	DC-6	DC-7	DC-8	DC-9	DC-10	DC-11
0	26.1	23.77	23.44	23.81	25.13	23.94	25.5	26.3	26.86	24.56	24.35
20	28.81	26.21	26.04	26.31	27.72	26.75	28.35	29.3	29.83	27.16	26.95
40	31.12	28.8	28.29	28.65	30.2	29.34	30.93	32.27	32.57	29.72	29.48
60	33.31	31.3	30.12	30.77	32.54	31.78	33.11	35	34.94	31.77	31.98
80	35.51	33.33	32.03	32.73	35.07	33.58	35.23	37.24	36.8	33.53	34.23
100	37.48	35.21	34.07	34.91	37.03	35.51	37.4	39.23	38.74	35.63	36.28
HybTw
Occupancy rate (%)	Driving cycles
	DC-1	DC-2	DC-3	DC-4	DC-5	DC-6	DC-7	DC-8	DC-9	DC-10	DC-11
0	12.03	10.33	11.08	9.98	11.07	11.69	12.32	12.81	12.94	11	11.33
20	12.66	10.96	11.58	10.54	11.64	12.32	13.02	13.59	13.75	11.62	11.94
40	13.25	11.5	12	11.03	12.14	12.95	13.6	14.26	14.45	12.15	12.52
60	13.76	11.98	12.41	11.46	12.73	13.55	14.15	14.95	15.06	12.63	13.07
80	14.18	12.44	12.8	11.89	13.19	14.13	14.64	15.5	15.72	13.03	13.58
100	14.6	12.8	13.2	12.28	13.67	14.79	15.09	16.08	16.29	13.4	13.98
HybAr
Occupancy rate (%)	Driving cycles
	DC-1	DC-2	DC-3	DC-4	DC-5	DC-6	DC-7	DC-8	DC-9	DC-10	DC-11
0	14.03	12.16	12.88	11.75	12.9	13.6	14.39	15.01	15.07	12.9	13.24
20	14.92	13.03	13.59	12.56	13.75	14.59	15.4	16.09	16.11	13.75	14.19
40	15.66	13.73	14.15	13.23	14.45	15.46	16.13	17.03	17.06	14.44	15.01
60	16.25	14.37	14.74	13.82	15.11	16.28	16.78	17.87	17.86	15.03	15.71
80	16.73	14.9	15.27	14.33	15.76	16.96	17.39	18.58	18.47	15.52	16.33
100	17.19	15.42	15.84	14.8	16.32	17.62	17.76	19.13	19.03	15.97	16.9
PlugTw
Occupancy rate (%)	Driving cycles
	DC-1	DC-2	DC-3	DC-4	DC-5	DC-6	DC-7	DC-8	DC-9	DC-10	DC-11
0	6.92229	4.72408	5.97804	4.57957	6.09789	6.57848	7.04634	7.49418	7.59172	5.73139	5.87442
20	7.88089	5.72121	6.86261	5.50525	6.86684	7.55903	8.17278	8.5485	8.66698	6.76533	6.86246
40	8.74829	6.65584	7.59067	6.30482	7.7771	8.5295	9.18317	9.71591	9.73462	8.16671	7.71209
60	9.65473	7.44247	8.24711	7.00984	8.56662	9.39377	10.1043	10.7074	10.5483	8.34023	8.84347
80	10.3659	8.14654	8.75696	7.56407	9.10742	10.1374	11.0242	11.7072	11.3598	9.03648	9.76549
100	10.857	8.88848	9.12695	8.20298	9.63315	11.0201	11.421	12.4214	12.1111	9.57455	10.355
PlugTw: only Biodiesel blend during CS mode
Occupancy rate (%)	Driving cycles
	DC-1	DC-2	DC-3	DC-4	DC-5	DC-6	DC-7	DC-8	DC-9	DC-10	DC-11
0	11.396	9.76769	10.5013	9.48886	10.7104	11.1199	11.5604	12.0774	12.2063	10.4694	10.687
20	12.3207	10.556	11.3049	10.236	11.4694	11.9616	12.4975	13.0818	13.1838	11.2727	11.5504
40	13.1902	11.3229	12.063	11.0036	12.2076	12.8114	13.4221	13.4736	14.0338	14.2443	12.0006
60	14.0023	12.0204	12.7118	11.6798	12.8985	13.6318	14.3049	15.0302	15.1477	12.7995	13.2146
80	14.7437	12.7144	13.2381	12.2887	13.5933	14.3766	15.1046	15.905	15.9951	13.4565	13.9663
100	15.4154	13.3395	13.7453	12.8477	14.1983	15.0871	15.8207	16.7084	16.8211	14.0868	14.6459
PlugTw: Only net electrical energy use during CD mode
Occupancy rate (%)	Driving cycles
	DC-1	DC-2	DC-3	DC-4	DC-5	DC-6	DC-7	DC-8	DC-9	DC-10	DC-11
0	4.27932	3.39219	3.88832	3.36098	3.95512	4.1352	4.31335	4.47415	4.49379	3.79497	3.82606
20	4.64856	3.76779	4.23358	3.71281	4.24118	4.53531	4.78889	4.8797	4.91951	4.21702	4.20507
40	4.97516	4.13375	4.49845	4.0085	4.62306	4.9416	5.20693	5.62977	5.3998	4.37476	4.61926
60	5.35227	4.44225	4.7455	4.27148	4.95323	5.29133	5.58028	5.77461	5.58831	4.82036	5.027
80	5.61151	4.70524	4.93059	4.46106	5.10816	5.57952	5.99692	6.22152	5.87203	5.09574	5.44437
100	5.72101	5.01743	5.02298	4.71476	5.27729	6.00453	5.99821	6.45226	6.11292	5.26616	5.63552
PlugTw: All-electric range (AER) during charge depleting (CD) mode (in km)
Occupancy rate (%)	Driving cycles
	DC-1	DC-2	DC-3	DC-4	DC-5	DC-6	DC-7	DC-8	DC-9	DC-10	DC-11
0	6.30941	7.95945	6.94387	8.03338	6.8266	6.52931	6.25964	6.03467	6.00829	7.11469	7.05687
20	5.80825	7.166	6.37758	7.27212	6.36616	5.95328	5.63804	5.53313	5.48835	6.40263	6.42082
40	5.42696	6.53161	6.00206	6.73569	5.84029	5.46381	5.1854	4.79593	5.00018	6.17176	5.84509
60	5.04459	6.078	5.6896	6.321	5.45099	5.10268	4.83847	4.67564	4.83151	5.60124	5.371
80	4.81154	5.73828	5.47602	6.05238	5.28566	4.83913	4.50231	4.33978	4.59807	5.29854	4.95925
100	4.71945	5.38124	5.37529	5.72669	5.11626	4.4966	4.50134	4.18458	4.41688	5.12708	4.79104
TABLE B11
DESCRIPTIVE STATISTICS OF ENERGY USE ESTIMATIONS. UNIT: MJ/km IF NOT OTHERWISE SPECIFIED
ConvBi
Occupancy rate (%)	N	Mean	S.D.	CV (%)	Min	Q25	Median	Q75	Max	Skew. (-)	Kurt. (-)	Mean (MJ/pkm)
0	11	24.8873	1.16572	4.684	23.44	23.875	24.56	25.8	26.86	0.448128	-1.22518
20	11	27.5845	1.31414	4.76405	26.04	26.53	27.16	28.58	29.83	0.506008	-1.13854	0.551691
40	11	30.1245	1.43936	4.77802	28.29	29.07	29.72	31.025	32.57	0.552842	-0.832246	0.301245
60	11	32.42	1.56786	4.8361	30.12	31.535	31.98	33.21	35	0.492352	-0.439686	0.216133
80	11	34.48	1.64724	4.77738	32.03	33.43	34.23	35.37	37.24	0.329327	-0.750433	0.1724
100	11	36.4991	1.62494	4.452	34.07	35.36	36.28	37.44	39.23	0.322529	-0.801161	0.145996
HybTw
Occupancy rate (%)	N	Mean	S.D.	CV (%)	Min	Q25	Median	Q75	Max	Skew. (-)	Kurt. (-)	Mean (MJ/pkm)
0	11	11.5073	0.953835	8.28898	9.98	11.035	11.33	12.175	12.94	0.048695	-0.82118
20	11	12.1473	1.02945	8.47472	10.54	11.6	11.94	12.84	13.75	0.182648	-0.821811	0.768815
40	11	12.7136	1.09711	8.62938	11.03	12.07	12.52	13.425	14.45	0.231211	-0.853002	0.40233
60	11	13.25	1.16344	8.7807	11.46	12.52	13.07	13.955	15.06	0.230515	-0.824232	0.279536
80	11	13.7364	1.22482	8.91663	11.89	12.915	13.58	14.41	15.72	0.290263	-0.790885	0.217348
100	11	14.1982	1.29686	9.13396	12.28	13.3	13.98	14.94	16.29	0.299611	-0.841214	0.179724
HybAr
Occupancy rate (%)	N	Mean	S.D.	CV (%)	Min	Q25	Median	Q75	Max	Skew. (-)	Kurt. (-)	Mean (MJ/pkm)
0	11	13.4482	1.08759	8.08728	11.75	12.89	13.24	14.21	15.07	0.147701	-0.874196
20	11	14.3618	1.17806	8.20275	12.56	13.67	14.19	15.16	16.11	0.199896	-0.945297	0.466293
40	11	15.1227	1.27308	8.41835	13.23	14.295	15.01	15.895	17.06	0.260494	-0.931238	0.245499
60	11	15.8018	1.34491	8.51109	13.82	14.885	15.71	16.53	17.87	0.301075	-0.875474	0.171015
80	11	16.3855	1.39421	8.50884	14.33	15.395	16.33	17.175	18.58	0.298935	-0.857645	0.132999
100	11	16.9073	1.40629	8.31768	14.8	15.905	16.9	17.69	19.13	0.292774	-0.777373	0.109787
PlugTw
Occupancy rate (%)	N	Mean	S.D.	CV (%)	Min	Q25	Median	Q75	Max	Skew. (-)	Kurt. (-)	Mean (MJ/pkm)
0	11	6.23804	1.00829	16.1636	4.57957	5.80291	6.09789	6.98432	7.59172	-0.343341	-0.723013
20	11	7.21926	1.05318	14.5885	5.50525	6.81389	6.86684	8.02683	8.66698	-0.214151	-0.843105	0.376003
40	11	8.19261	1.13109	13.8062	6.30482	7.65138	8.16671	8.96573	9.73462	-0.200577	-0.739036	0.213349
60	11	8.98711	1.21305	13.4977	7.00984	8.29367	8.84347	9.87952	10.7074	-0.103649	-0.952072	0.156026
80	11	9.72469	1.33514	13.7294	7.56407	8.89672	9.76549	10.6951	11.7072	-0.0406338	-0.99989	0.126624
100	11	10.3283	1.36371	13.2036	8.20298	9.35075	10.355	11.2206	12.4214	0.0739869	-1.07258	0.107587
PlugTw: only Biodiesel blend during CS mode
Occupancy rate (%)	N	Mean	S.D.	CV (%)	Min	Q25	Median	Q75	Max	Skew. (-)	Kurt. (-)	Mean (MJ/pkm)
0	11	10.9077	0.867285	7.95114	9.48886	10.4853	10.7104	11.4782	12.2063	-0.0586133	-0.678034
20	11	11.7668	0.94964	8.07051	10.236	11.2888	11.5504	12.4091	13.1838	0.0098286	-0.749451	0.612854
40	11	12.7066	1.06992	8.42018	11.0036	12.0318	12.8114	13.4478	14.2443	-0.142438	-1.10058	0.330902
60	11	13.4038	1.13708	8.48329	11.6798	12.7556	13.2146	14.1536	15.1477	0.175032	-0.880948	0.232704
80	11	14.1257	1.2237	8.66298	12.2887	13.3473	13.9663	14.9242	15.9951	0.212954	-0.932227	0.183928
100	11	14.7924	1.31074	8.86091	12.8477	13.916	14.6459	15.618	16.8211	0.249949	-0.935333	0.154087
PlugTw: Only net electrical energy use during CD mode
Occupancy rate (%)	N	Mean	S.D.	CV (%)	Min	Q25	Median	Q75	Max	Skew. (-)	Kurt. (-)	Mean (MJ/pkm)
0	11	3.99213	0.39077	9.78851	3.36098	3.81051	3.95512	4.29634	4.49379	-0.374363	-0.818781
20	11	4.37722	0.414964	9.48007	3.71281	4.21104	4.24118	4.71873	4.91951	-0.263917	-0.950776	0.22798
40	11	4.76464	0.515456	10.8184	4.0085	4.43661	4.62306	5.09104	5.62977	0.212106	-0.846524	0.124079
60	11	5.07697	0.486667	9.58578	4.27148	4.78293	5.027	5.46627	5.77461	-0.21437	-0.972997	0.0881418
80	11	5.36606	0.555217	10.3468	4.46106	5.01317	5.44437	5.74177	6.22152	-0.0840158	-0.940121	0.0698706
100	11	5.56573	0.546463	9.81834	4.71476	5.14457	5.63552	6.00137	6.45226	0.028611	-1.08997	0.0579764
PlugTw: All-electric range (AER) during charge depleting (CD) mode (in km)
Occupancy rate (%)	N	Mean	S.D.	CV (%)	Min	Q25	Median	Q75	Max	Skew. (-)	Kurt. (-)	Mean (MJ/pkm)
0	11	6.8251	0.697389	10.218	6.00829	6.28452	6.8266	7.08578	8.03338	0.677216	-0.436002
20	11	6.22058	0.60895	9.78929	5.48835	5.72315	6.36616	6.41173	7.27212	0.554483	-0.586453
40	11	5.72716	0.617484	10.7817	4.79593	5.30618	5.84029	6.08691	6.73569	0.136024	-0.851488
60	11	5.36407	0.529096	9.8637	4.67564	4.94153	5.371	5.64542	6.321	0.508059	-0.635981
80	11	5.08191	0.537055	10.568	4.33978	4.7048	4.95925	5.38728	6.05238	0.41347	-0.68316
100	11	4.89422	0.484793	9.90542	4.18458	4.49897	4.79104	5.25118	5.72669	0.248055	-1.01077
TABLE B12
FUEL COST ESTIMATIONS. UNIT: USD/km IF NOT OTHERWISE SPECIFIED
ConvBi
Occupancy rate (%)	N	Mean	Uc	Cv (%)	K=√2: √2⋅Uc	√2⋅Cv (%)	K=2: 2⋅Uc	2⋅Cv (%)	K=3: 3⋅Uc	3⋅Cv (%)	Mean (MJ/pkm)
0	11	0.551749	0.0436088	7.90375	0.0616722	11.1776	0.0872177	15.8075	0.130827	23.7112
20	11	0.611547	0.0486466	7.95468	0.0687967	11.2496	0.0972932	15.9094	0.14594	23.864	0.0122309
40	11	0.667859	0.0531395	7.9567	0.0751506	11.2525	0.106279	15.9134	0.159419	23.8701	0.00667859
60	11	0.718749	0.0573617	7.98077	0.0811217	11.2865	0.114723	15.9615	0.172085	23.9423	0.00479166
80	11	0.764419	0.0607009	7.94079	0.085844	11.23	0.121402	15.8816	0.182103	23.8224	0.00382209
100	11	0.809182	0.0627702	7.75724	0.0887704	10.9704	0.12554	15.5145	0.188311	23.2717	0.00323673
HybTw
Occupancy rate (%)	N	Mean	Uc	Cv (%)	K=√2: √2⋅Uc	√2⋅Cv (%)	K=2: 2⋅Uc	2⋅Cv (%)	K=3: 3⋅Uc	3⋅Cv (%)	Mean (MJ/pkm)
0	11	0.255115	0.02674	10.4815	0.0378161	14.8231	0.0534801	20.9631	0.0802201	31.4446
20	11	0.269304	0.0285993	10.6197	0.0404455	15.0185	0.0571986	21.2394	0.0857979	31.8591	0.0170446
40	11	0.28186	0.0302592	10.7355	0.042793	15.1823	0.0605185	21.4711	0.0907777	32.2066	0.00891963
60	11	0.293751	0.0318641	10.8473	0.0450627	15.3404	0.0637282	21.6946	0.0955924	32.5419	0.00619729
80	11	0.304534	0.0333614	10.9549	0.0471801	15.4926	0.0667228	21.9098	0.100084	32.8647	0.00481858
100	11	0.314773	0.035027	11.1277	0.0495357	15.737	0.070054	22.2554	0.105081	33.3832	0.00398446
HybAr
Occupancy rate (%)	N	Mean	Uc	Cv (%)	K=√2: √2⋅Uc	√2⋅Cv (%)	K=2: 2⋅Uc	2⋅Cv (%)	K=3: 3⋅Uc	3⋅Cv (%)	Mean (MJ/pkm)
0	11	0.298145	0.0307615	10.3176	0.0435033	14.5913	0.061523	20.6353	0.0922845	30.9529
20	11	0.3184	0.0331077	10.3981	0.0468213	14.7052	0.0662153	20.7962	0.099323	31.1944	0.0103377
40	11	0.33527	0.0354	10.5587	0.0500632	14.9322	0.0708001	21.1173	0.1062	31.676	0.00544269
60	11	0.350325	0.0372369	10.6292	0.0526609	15.032	0.0744738	21.2585	0.111711	31.8877	0.0037914
80	11	0.363264	0.0385961	10.6248	0.0545832	15.0257	0.0771922	21.2496	0.115788	31.8744	0.00294857
100	11	0.374833	0.0392722	10.4772	0.0555392	14.8171	0.0785443	20.9545	0.117817	31.4317	0.00243398
PlugTw
Occupancy rate (%)	N	Mean	Uc	Cv (%)	K=√2: √2⋅Uc	√2⋅Cv (%)	K=2: 2⋅Uc	2⋅Cv (%)	K=3: 3⋅Uc	3⋅Cv (%)	Mean (MJ/pkm)
0	11	0.198162	0.0346254	17.4733	0.0489677	24.7109	0.0692508	34.9466	0.103876	52.4198
20	11	0.219887	0.0362859	16.502	0.0513159	23.3374	0.0725717	33.004	0.108858	49.506	0.0114525
40	11	0.241919	0.0383804	15.865	0.054278	22.4364	0.0767607	31.7299	0.115141	47.5949	0.00629998
60	11	0.259062	0.0403941	15.5925	0.057126	22.0511	0.0807883	31.185	0.121182	46.7774	0.0044976
80	11	0.275479	0.0429544	15.5926	0.0607466	22.0513	0.0859087	31.1852	0.128863	46.7779	0.00358696
100	11	0.288777	0.0439696	15.2261	0.0621824	21.533	0.0879391	30.4523	0.131909	45.6784	0.00300809
Note: Chebyshev's inequality states that 50%, 75% and 88.9% of the expected values are covered by √2, 2 and 3 times of the standard uncertainty away from the mean.

## Sheet: SCENARIO ANALYSIS - BASELINE
SCENARIO ANALYSIS - BASELINE
This sheet contains the input data for the baseline scenario.
TABLE B13
TIME TABLE OF BRT ROUTE 503 AT BUS STOP 'Tubo Praça Carlos Gomes’
Day	Departure time
Monday	05:29:00	05:45:00	05:55:00	06:05:00	06:18:00	06:31:00	06:44:00	06:51:00	07:04:00	07:11:00	07:17:00	07:24:00	07:31:00	07:37:00	07:44:00	07:57:00	08:08:00	08:19:00	08:30:00	08:41:00	08:52:00	09:03:00	09:14:00	09:25:00	09:36:00	09:47:00	09:58:00	10:09:00	10:20:00	10:31:00	10:42:00	10:53:00	11:04:00	11:15:00	11:26:00	11:37:00	11:48:00	11:59:00	12:10:00	12:21:00	12:32:00	12:43:00	12:54:00	13:05:00	13:16:00	13:27:00	13:38:00	13:49:00	14:00:00
Tuesday	05:29:00	05:45:00	05:55:00	06:05:00	06:18:00	06:31:00	06:44:00	06:51:00	07:04:00	07:11:00	07:17:00	07:24:00	07:31:00	07:37:00	07:44:00	07:57:00	08:08:00	08:19:00	08:30:00	08:41:00	08:52:00	09:03:00	09:14:00	09:25:00	09:36:00	09:47:00	09:58:00	10:09:00	10:20:00	10:31:00	10:42:00	10:53:00	11:04:00	11:15:00	11:26:00	11:37:00	11:48:00	11:59:00	12:10:00	12:21:00	12:32:00	12:43:00	12:54:00	13:05:00	13:16:00	13:27:00	13:38:00	13:49:00	14:00:00
Wednesday	05:29:00	05:45:00	05:55:00	06:05:00	06:18:00	06:31:00	06:44:00	06:51:00	07:04:00	07:11:00	07:17:00	07:24:00	07:31:00	07:37:00	07:44:00	07:57:00	08:08:00	08:19:00	08:30:00	08:41:00	08:52:00	09:03:00	09:14:00	09:25:00	09:36:00	09:47:00	09:58:00	10:09:00	10:20:00	10:31:00	10:42:00	10:53:00	11:04:00	11:15:00	11:26:00	11:37:00	11:48:00	11:59:00	12:10:00	12:21:00	12:32:00	12:43:00	12:54:00	13:05:00	13:16:00	13:27:00	13:38:00	13:49:00	14:00:00
Thursday	05:29:00	05:45:00	05:55:00	06:05:00	06:18:00	06:31:00	06:44:00	06:51:00	07:04:00	07:11:00	07:17:00	07:24:00	07:31:00	07:37:00	07:44:00	07:57:00	08:08:00	08:19:00	08:30:00	08:41:00	08:52:00	09:03:00	09:14:00	09:25:00	09:36:00	09:47:00	09:58:00	10:09:00	10:20:00	10:31:00	10:42:00	10:53:00	11:04:00	11:15:00	11:26:00	11:37:00	11:48:00	11:59:00	12:10:00	12:21:00	12:32:00	12:43:00	12:54:00	13:05:00	13:16:00	13:27:00	13:38:00	13:49:00	14:00:00
Friday	05:29:00	05:45:00	05:55:00	06:05:00	06:18:00	06:31:00	06:44:00	06:51:00	07:04:00	07:11:00	07:17:00	07:24:00	07:31:00	07:37:00	07:44:00	07:57:00	08:08:00	08:19:00	08:30:00	08:41:00	08:52:00	09:03:00	09:14:00	09:25:00	09:36:00	09:47:00	09:58:00	10:09:00	10:20:00	10:31:00	10:42:00	10:53:00	11:04:00	11:15:00	11:26:00	11:37:00	11:48:00	11:59:00	12:10:00	12:21:00	12:32:00	12:43:00	12:54:00	13:05:00	13:16:00	13:27:00	13:38:00	13:49:00	14:00:00
Saturday	05:45:00	06:01:00	06:11:00	06:20:00	06:30:00	06:40:00	06:50:00	06:57:00	07:08:00	07:17:00	07:23:00	07:32:00	07:42:00	07:53:00	08:02:00	08:11:00	08:19:00	08:31:00	08:41:00	08:48:00	09:00:00	09:06:00	09:23:00	09:35:00	09:46:00	09:57:00	10:06:00	10:17:00	10:27:00	10:38:00	10:49:00	10:59:00	11:09:00	11:21:00	11:31:00	11:43:00	11:53:00	12:03:00	12:14:00	12:26:00	12:36:00	12:46:00	12:59:00	13:10:00	13:22:00	13:34:00	13:39:00	13:50:00	14:03:00
Sunday	05:50:00	06:01:00	06:14:00	06:27:00	06:40:00	06:53:00	07:06:00	07:19:00	07:32:00	07:45:00	07:58:00	08:11:00	08:24:00	08:37:00	08:50:00	09:03:00	09:16:00	09:29:00	09:42:00	09:55:00	10:08:00	10:21:00	10:34:00	10:47:00	11:00:00	11:13:00	11:26:00	11:39:00	11:52:00	12:05:00	12:18:00	12:31:00	12:44:00	12:57:00	13:10:00	13:23:00	13:36:00	13:49:00	14:02:00	14:15:00	14:28:00	14:41:00	14:54:00	15:07:00	15:20:00	15:33:00	15:46:00	15:59:00	16:12:00
Source: (URBS, 2018b)
TABLE B14
TIME TABLE - NUMBER OF BUSES, HEADYWAY, AGGREGATED PASSENGER CARRYING CAPACITY OF THE BASELINE SCENARIO BY TIME SLICE (TS)
Start	05:00:00	06:00:00	07:00:00	08:00:00	09:00:00	10:00:00	11:00:00	12:00:00	13:00:00	14:00:00	15:00:00	16:00:00	17:00:00	18:00:00	19:00:00	20:00:00	21:00:00	22:00:00	23:00:00
Ende	06:00:00	07:00:00	08:00:00	09:00:00	10:00:00	11:00:00	12:00:00	13:00:00	14:00:00	15:00:00	16:00:00	17:00:00	18:00:00	19:00:00	20:00:00	21:00:00	22:00:00	23:00:00	1900-01-01
TS	[5:00:00, 6:00:00)	[6:00:00, 7:00:00)	[7:00:00, 8:00:00)	[8:00:00, 9:00:00)	[9:00:00, 10:00:00)	[10:00:00, 11:00:00)	[11:00:00, 12:00:00)	[12:00:00, 13:00:00)	[13:00:00, 14:00:00)	[14:00:00, 15:00:00)	[15:00:00, 16:00:00)	[16:00:00, 17:00:00)	[17:00:00, 18:00:00)	[18:00:00, 19:00:00)	[19:00:00, 20:00:00)	[20:00:00, 21:00:00)	[21:00:00, 22:00:00)	[22:00:00, 23:00:00)	[23:00:00, 24:00:00)
Number of buses start operation in TS
Monday-Friday	3	5	8	5	6	5	6	5	5	6	5	6	7	8	8	5	6	5	5
Saturday	1	7	6	6	6	6	5	6	5	5	4	5	5	4	5	5	4	5	4
Sunday	1	5	5	4	5	4	5	5	4	5	5	4	5	4	5	5	4	5	4
Headway (minutes between buses)
Monday-Friday	20	12	7.5	12	10	12	10	12	12	10	12	10	8.57143	7.5	7.5	12	10	12	12
Saturday	60	8.57143	10	10	10	10	12	10	12	12	15	12	12	15	12	12	15	12	15
Sunday	60	12	12	15	12	15	12	12	15	12	12	15	12	15	12	12	15	12	15
Aggregated passenger carrying capacity per hour when using the current conventional bi-articulated bus fleet
Monday-Friday	750	1250	2000	1250	1500	1250	1500	1250	1250	1500	1250	1500	1750	2000	2000	1250	1500	1250	1250
Saturday	250	1750	1500	1500	1500	1500	1250	1500	1250	1250	1000	1250	1250	1000	1250	1250	1000	1250	1000
Sunday	250	1250	1250	1000	1250	1000	1250	1250	1000	1250	1250	1000	1250	1000	1250	1250	1000	1250	1000
[truncated: 60 more columns]

## Sheet: SCENARIO ANALYSIS - RESULTS
SCENARIO ANALYSIS - RESULTS
This sheet contains the results from the scenario analysis that was obtained from the techno-economic optimisation model.
TABLE B15.1						TABLE B15.2						TABLE B15.3						TABLE B15.4						TABLE B15.5						TABLE B15.6						TABLE B15.7
RESULTS OF SCENARIO: Baseline						RESULTS OF SCENARIO: ScConv0						RESULTS OF SCENARIO: ScConv50						RESULTS OF SCENARIO: ScHybrid100						RESULTS OF SCENARIO: ScPlug25						RESULTS OF SCENARIO: ScPlug50						RESULTS OF SCENARIO: ScPlug100
Variable	Value	Day	TS	Bus		Variable	Value	Day	TS	Bus		Variable	Value	Day	TS	Bus		Variable	Value	Day	TS	Bus		Variable	Value	Day	TS	Bus		Variable	Value	Day	TS	Bus		Variable	Value	Day	TS	Bus
WeeklyCTS	61000					WeeklyCTS	100000					WeeklyCTS	79000					WeeklyCTS	100000					WeeklyCTS	110000					WeeklyCTS	113000					WeeklyCTS	147000
AverageHeadway	11.04					AverageHeadway	6.39					AverageHeadway	8.13					AverageHeadway	6.39					AverageHeadway	5.72					AverageHeadway	5.52					AverageHeadway	4.05
AverageHeadway	11.04					AverageHeadway	6.39					AverageHeadway	8.13					AverageHeadway	6.39					AverageHeadway	5.72					AverageHeadway	5.52					AverageHeadway	4.05
Frequency	5.44					Frequency	9.39					Frequency	7.38					Frequency	9.39					Frequency	10.49					Frequency	10.87					Frequency	14.83
Share_ConvBi	100					Share_ConvBi	0					Share_ConvBi	46.4					Share_ConvBi	0					Share_ConvBi	0					Share_ConvBi	0					Share_ConvBi	0
Share_HybTw	0					Share_HybTw	6.5					Share_HybTw	12					Share_HybTw	6.5					Share_HybTw	0					Share_HybTw	0					Share_HybTw	0
Share_HybAr	0					Share_HybAr	88.2					Share_HybAr	39.9					Share_HybAr	93.5					Share_HybAr	59.1					Share_HybAr	50					Share_HybAr	0
Share_PlugTw	0					Share_PlugTw	5.3					Share_PlugTw	1.6					Share_PlugTw	0					Share_PlugTw	40.9					Share_PlugTw	50					Share_PlugTw	100
AggPCC	750	Friday	0506			AggPCC	770	Friday	0506			AggPCC	750	Friday	0506			AggPCC	770	Friday	0506			AggPCC	750	Friday	0506			AggPCC	750	Friday	0506			AggPCC	768	Friday	0506
AggPCC	1250	Friday	0607			AggPCC	1253	Friday	0607			AggPCC	1291	Friday	0607			AggPCC	1311	Friday	0607			AggPCC	1250	Friday	0607			AggPCC	1250	Friday	0607			AggPCC	1344	Friday	0607
AggPCC	2000	Friday	0708			AggPCC	2002	Friday	0708			AggPCC	2020	Friday	0708			AggPCC	2002	Friday	0708			AggPCC	2020	Friday	0708			AggPCC	2000	Friday	0708			AggPCC	2016	Friday	0708
AggPCC	1250	Friday	0809			AggPCC	1253	Friday	0809			AggPCC	1291	Friday	0809			AggPCC	1311	Friday	0809			AggPCC	1250	Friday	0809			AggPCC	1250	Friday	0809			AggPCC	1344	Friday	0809
AggPCC	1500	Friday	0910			AggPCC	1540	Friday	0910			AggPCC	1541	Friday	0910			AggPCC	1540	Friday	0910			AggPCC	1520	Friday	0910			AggPCC	1500	Friday	0910			AggPCC	1536	Friday	0910
AggPCC	1250	Friday	1011			AggPCC	1253	Friday	1011			AggPCC	1291	Friday	1011			AggPCC	1311	Friday	1011			AggPCC	1250	Friday	1011			AggPCC	1250	Friday	1011			AggPCC	1344	Friday	1011
AggPCC	1500	Friday	1112			AggPCC	1540	Friday	1112			AggPCC	1541	Friday	1112			AggPCC	1540	Friday	1112			AggPCC	1520	Friday	1112			AggPCC	1500	Friday	1112			AggPCC	1536	Friday	1112
AggPCC	1250	Friday	1213			AggPCC	1253	Friday	1213			AggPCC	1291	Friday	1213			AggPCC	1311	Friday	1213			AggPCC	1250	Friday	1213			AggPCC	1250	Friday	1213			AggPCC	1344	Friday	1213
AggPCC	1250	Friday	1314			AggPCC	1253	Friday	1314			AggPCC	1291	Friday	1314			AggPCC	1311	Friday	1314			AggPCC	1250	Friday	1314			AggPCC	1250	Friday	1314			AggPCC	1344	Friday	1314
AggPCC	1500	Friday	1415			AggPCC	1540	Friday	1415			AggPCC	1541	Friday	1415			AggPCC	1540	Friday	1415			AggPCC	1520	Friday	1415			AggPCC	1500	Friday	1415			AggPCC	1536	Friday	1415
AggPCC	1250	Friday	1516			AggPCC	1253	Friday	1516			AggPCC	1291	Friday	1516			AggPCC	1311	Friday	1516			AggPCC	1250	Friday	1516			AggPCC	1250	Friday	1516			AggPCC	1344	Friday	1516
AggPCC	1500	Friday	1617			AggPCC	1540	Friday	1617			AggPCC	1541	Friday	1617			AggPCC	1540	Friday	1617			AggPCC	1520	Friday	1617			AggPCC	1500	Friday	1617			AggPCC	1536	Friday	1617
AggPCC	1750	Friday	1718			AggPCC	1773	Friday	1718			AggPCC	1770	Friday	1718			AggPCC	1773	Friday	1718			AggPCC	1770	Friday	1718			AggPCC	1750	Friday	1718			AggPCC	1824	Friday	1718
AggPCC	2000	Friday	1819			AggPCC	2002	Friday	1819			AggPCC	2020	Friday	1819			AggPCC	2002	Friday	1819			AggPCC	2020	Friday	1819			AggPCC	2000	Friday	1819			AggPCC	2016	Friday	1819
AggPCC	2000	Friday	1920			AggPCC	2002	Friday	1920			AggPCC	2020	Friday	1920			AggPCC	2002	Friday	1920			AggPCC	2020	Friday	1920			AggPCC	2000	Friday	1920			AggPCC	2016	Friday	1920
AggPCC	1250	Friday	2021			AggPCC	1253	Friday	2021			AggPCC	1291	Friday	2021			AggPCC	1311	Friday	2021			AggPCC	1250	Friday	2021			AggPCC	1250	Friday	2021			AggPCC	1344	Friday	2021
AggPCC	1500	Friday	2122			AggPCC	1540	Friday	2122			AggPCC	1541	Friday	2122			AggPCC	1540	Friday	2122			AggPCC	1520	Friday	2122			AggPCC	1500	Friday	2122			AggPCC	1536	Friday	2122
AggPCC	1250	Friday	2223			AggPCC	1253	Friday	2223			AggPCC	1291	Friday	2223			AggPCC	1311	Friday	2223			AggPCC	1250	Friday	2223			AggPCC	1250	Friday	2223			AggPCC	1344	Friday	2223
AggPCC	1250	Friday	2324			AggPCC	1253	Friday	2324			AggPCC	1291	Friday	2324			AggPCC	1311	Friday	2324			AggPCC	1250	Friday	2324			AggPCC	1250	Friday	2324			AggPCC	1344	Friday	2324
AggPCC	750	Monday	0506			AggPCC	770	Monday	0506			AggPCC	750	Monday	0506			AggPCC	770	Monday	0506			AggPCC	750	Monday	0506			AggPCC	750	Monday	0506			AggPCC	768	Monday	0506
AggPCC	1250	Monday	0607			AggPCC	1253	Monday	0607			AggPCC	1291	Monday	0607			AggPCC	1311	Monday	0607			AggPCC	1250	Monday	0607			AggPCC	1250	Monday	0607			AggPCC	1344	Monday	0607
AggPCC	2000	Monday	0708			AggPCC	2002	Monday	0708			AggPCC	2020	Monday	0708			AggPCC	2002	Monday	0708			AggPCC	2020	Monday	0708			AggPCC	2000	Monday	0708			AggPCC	2016	Monday	0708
AggPCC	1250	Monday	0809			AggPCC	1253	Monday	0809			AggPCC	1291	Monday	0809			AggPCC	1311	Monday	0809			AggPCC	1250	Monday	0809			AggPCC	1250	Monday	0809			AggPCC	1344	Monday	0809
AggPCC	1500	Monday	0910			AggPCC	1540	Monday	0910			AggPCC	1541	Monday	0910			AggPCC	1540	Monday	0910			AggPCC	1520	Monday	0910			AggPCC	1500	Monday	0910			AggPCC	1536	Monday	0910
AggPCC	1250	Monday	1011			AggPCC	1253	Monday	1011			AggPCC	1291	Monday	1011			AggPCC	1311	Monday	1011			AggPCC	1250	Monday	1011			AggPCC	1250	Monday	1011			AggPCC	1344	Monday	1011
AggPCC	1500	Monday	1112			AggPCC	1540	Monday	1112			AggPCC	1541	Monday	1112			AggPCC	1540	Monday	1112			AggPCC	1520	Monday	1112			AggPCC	1500	Monday	1112			AggPCC	1536	Monday	1112
AggPCC	1250	Monday	1213			AggPCC	1253	Monday	1213			AggPCC	1291	Monday	1213			AggPCC	1311	Monday	1213			AggPCC	1250	Monday	1213			AggPCC	1250	Monday	1213			AggPCC	1344	Monday	1213
AggPCC	1250	Monday	1314			AggPCC	1253	Monday	1314			AggPCC	1291	Monday	1314			AggPCC	1311	Monday	1314			AggPCC	1250	Monday	1314			AggPCC	1250	Monday	1314			AggPCC	1344	Monday	1314
AggPCC	1500	Monday	1415			AggPCC	1540	Monday	1415			AggPCC	1541	Monday	1415			AggPCC	1540	Monday	1415			AggPCC	1520	Monday	1415			AggPCC	1500	Monday	1415			AggPCC	1536	Monday	1415
AggPCC	1250	Monday	1516			AggPCC	1253	Monday	1516			AggPCC	1291	Monday	1516			AggPCC	1311	Monday	1516			AggPCC	1250	Monday	1516			AggPCC	1250	Monday	1516			AggPCC	1344	Monday	1516
AggPCC	1500	Monday	1617			AggPCC	1540	Monday	1617			AggPCC	1541	Monday	1617			AggPCC	1540	Monday	1617			AggPCC	1520	Monday	1617			AggPCC	1500	Monday	1617			AggPCC	1536	Monday	1617
AggPCC	1750	Monday	1718			AggPCC	1773	Monday	1718			AggPCC	1770	Monday	1718			AggPCC	1773	Monday	1718			AggPCC	1770	Monday	1718			AggPCC	1750	Monday	1718			AggPCC	1824	Monday	1718
AggPCC	2000	Monday	1819			AggPCC	2002	Monday	1819			AggPCC	2020	Monday	1819			AggPCC	2002	Monday	1819			AggPCC	2020	Monday	1819			AggPCC	2000	Monday	1819			AggPCC	2016	Monday	1819
AggPCC	2000	Monday	1920			AggPCC	2002	Monday	1920			AggPCC	2020	Monday	1920			AggPCC	2002	Monday	1920			AggPCC	2020	Monday	1920			AggPCC	2000	Monday	1920			AggPCC	2016	Monday	1920
AggPCC	1250	Monday	2021			AggPCC	1253	Monday	2021			AggPCC	1291	Monday	2021			AggPCC	1311	Monday	2021			AggPCC	1250	Monday	2021			AggPCC	1250	Monday	2021			AggPCC	1344	Monday	2021
AggPCC	1500	Monday	2122			AggPCC	1540	Monday	2122			AggPCC	1541	Monday	2122			AggPCC	1540	Monday	2122			AggPCC	1520	Monday	2122			AggPCC	1500	Monday	2122			AggPCC	1536	Monday	2122
AggPCC	1250	Monday	2223			AggPCC	1253	Monday	2223			AggPCC	1291	Monday	2223			AggPCC	1311	Monday	2223			AggPCC	1250	Monday	2223			AggPCC	1250	Monday	2223			AggPCC	1344	Monday	2223
AggPCC	1250	Monday	2324			AggPCC	1253	Monday	2324			AggPCC	1291	Monday	2324			AggPCC	1311	Monday	2324			AggPCC	1250	Monday	2324			AggPCC	1250	Monday	2324			AggPCC	1344	Monday	2324
AggPCC	250	Saturday	0506			AggPCC	250	Saturday	0506			AggPCC	329	Saturday	0506			AggPCC	308	Saturday	0506			AggPCC	250	Saturday	0506			AggPCC	250	Saturday	0506			AggPCC	288	Saturday	0506
AggPCC	1750	Saturday	0607			AggPCC	1773	Saturday	0607			AggPCC	1770	Saturday	0607			AggPCC	1773	Saturday	0607			AggPCC	1770	Saturday	0607			AggPCC	1750	Saturday	0607			AggPCC	1824	Saturday	0607
AggPCC	1500	Saturday	0708			AggPCC	1540	Saturday	0708			AggPCC	1541	Saturday	0708			AggPCC	1540	Saturday	0708			AggPCC	1520	Saturday	0708			AggPCC	1500	Saturday	0708			AggPCC	1536	Saturday	0708
AggPCC	1500	Saturday	0809			AggPCC	1540	Saturday	0809			AggPCC	1541	Saturday	0809			AggPCC	1540	Saturday	0809			AggPCC	1520	Saturday	0809			AggPCC	1500	Saturday	0809			AggPCC	1536	Saturday	0809
AggPCC	1500	Saturday	0910			AggPCC	1540	Saturday	0910			AggPCC	1541	Saturday	0910			AggPCC	1540	Saturday	0910			AggPCC	1520	Saturday	0910			AggPCC	1500	Saturday	0910			AggPCC	1536	Saturday	0910
AggPCC	1500	Saturday	1011			AggPCC	1540	Saturday	1011			AggPCC	1541	Saturday	1011			AggPCC	1540	Saturday	1011			AggPCC	1520	Saturday	1011			AggPCC	1500	Saturday	1011			AggPCC	1536	Saturday	1011
AggPCC	1250	Saturday	1112			AggPCC	1253	Saturday	1112			AggPCC	1291	Saturday	1112			AggPCC	1311	Saturday	1112			AggPCC	1250	Saturday	1112			AggPCC	1250	Saturday	1112			AggPCC	1344	Saturday	1112
AggPCC	1500	Saturday	1213			AggPCC	1540	Saturday	1213			AggPCC	1541	Saturday	1213			AggPCC	1540	Saturday	1213			AggPCC	1520	Saturday	1213			AggPCC	1500	Saturday	1213			AggPCC	1536	Saturday	1213
AggPCC	1250	Saturday	1314			AggPCC	1253	Saturday	1314			AggPCC	1291	Saturday	1314			AggPCC	1311	Saturday	1314			AggPCC	1250	Saturday	1314			AggPCC	1250	Saturday	1314			AggPCC	1344	Saturday	1314
AggPCC	1250	Saturday	1415			AggPCC	1253	Saturday	1415			AggPCC	1291	Saturday	1415			AggPCC	1311	Saturday	1415			AggPCC	1250	Saturday	1415			AggPCC	1250	Saturday	1415			AggPCC	1344	Saturday	1415
AggPCC	1000	Saturday	1516			AggPCC	1003	Saturday	1516			AggPCC	1004	Saturday	1516			AggPCC	1003	Saturday	1516			AggPCC	1000	Saturday	1516			AggPCC	1000	Saturday	1516			AggPCC	1056	Saturday	1516
AggPCC	1250	Saturday	1617			AggPCC	1253	Saturday	1617			AggPCC	1291	Saturday	1617			AggPCC	1311	Saturday	1617			AggPCC	1250	Saturday	1617			AggPCC	1250	Saturday	1617			AggPCC	1344	Saturday	1617
AggPCC	1250	Saturday	1718			AggPCC	1253	Saturday	1718			AggPCC	1291	Saturday	1718			AggPCC	1311	Saturday	1718			AggPCC	1250	Saturday	1718			AggPCC	1250	Saturday	1718			AggPCC	1344	Saturday	1718
AggPCC	1000	Saturday	1819			AggPCC	1003	Saturday	1819			AggPCC	1004	Saturday	1819			AggPCC	1003	Saturday	1819			AggPCC	1000	Saturday	1819			AggPCC	1000	Saturday	1819			AggPCC	1056	Saturday	1819
AggPCC	1250	Saturday	1920			AggPCC	1253	Saturday	1920			AggPCC	1291	Saturday	1920			AggPCC	1311	Saturday	1920			AggPCC	1250	Saturday	1920			AggPCC	1250	Saturday	1920			AggPCC	1344	Saturday	1920
AggPCC	1250	Saturday	2021			AggPCC	1253	Saturday	2021			AggPCC	1291	Saturday	2021			AggPCC	1311	Saturday	2021			AggPCC	1250	Saturday	2021			AggPCC	1250	Saturday	2021			AggPCC	1344	Saturday	2021
AggPCC	1000	Saturday	2122			AggPCC	1003	Saturday	2122			AggPCC	1004	Saturday	2122			AggPCC	1003	Saturday	2122			AggPCC	1000	Saturday	2122			AggPCC	1000	Saturday	2122			AggPCC	1056	Saturday	2122
AggPCC	1250	Saturday	2223			AggPCC	1253	Saturday	2223			AggPCC	1291	Saturday	2223			AggPCC	1311	Saturday	2223			AggPCC	1250	Saturday	2223			AggPCC	1250	Saturday	2223			AggPCC	1344	Saturday	2223
AggPCC	1000	Saturday	2324			AggPCC	1003	Saturday	2324			AggPCC	1004	Saturday	2324			AggPCC	1003	Saturday	2324			AggPCC	1000	Saturday	2324			AggPCC	1000	Saturday	2324			AggPCC	1056	Saturday	2324
AggPCC	250	Sunday	0506			AggPCC	250	Sunday	0506			AggPCC	329	Sunday	0506			AggPCC	308	Sunday	0506			AggPCC	250	Sunday	0506			AggPCC	250	Sunday	0506			AggPCC	288	Sunday	0506
AggPCC	1250	Sunday	0607			AggPCC	1253	Sunday	0607			AggPCC	1291	Sunday	0607			AggPCC	1311	Sunday	0607			AggPCC	1250	Sunday	0607			AggPCC	1250	Sunday	0607			AggPCC	1344	Sunday	0607
AggPCC	1250	Sunday	0708			AggPCC	1253	Sunday	0708			AggPCC	1291	Sunday	0708			AggPCC	1311	Sunday	0708			AggPCC	1250	Sunday	0708			AggPCC	1250	Sunday	0708			AggPCC	1344	Sunday	0708
AggPCC	1000	Sunday	0809			AggPCC	1003	Sunday	0809			AggPCC	1004	Sunday	0809			AggPCC	1003	Sunday	0809			AggPCC	1000	Sunday	0809			AggPCC	1000	Sunday	0809			AggPCC	1056	Sunday	0809
AggPCC	1250	Sunday	0910			AggPCC	1253	Sunday	0910			AggPCC	1291	Sunday	0910			AggPCC	1311	Sunday	0910			AggPCC	1250	Sunday	0910			AggPCC	1250	Sunday	0910			AggPCC	1344	Sunday	0910
AggPCC	1000	Sunday	1011			AggPCC	1003	Sunday	1011			AggPCC	1004	Sunday	1011			AggPCC	1003	Sunday	1011			AggPCC	1000	Sunday	1011			AggPCC	1000	Sunday	1011			AggPCC	1056	Sunday	1011
AggPCC	1250	Sunday	1112			AggPCC	1253	Sunday	1112			AggPCC	1291	Sunday	1112			AggPCC	1311	Sunday	1112			AggPCC	1250	Sunday	1112			AggPCC	1250	Sunday	1112			AggPCC	1344	Sunday	1112
AggPCC	1250	Sunday	1213			AggPCC	1253	Sunday	1213			AggPCC	1291	Sunday	1213			AggPCC	1311	Sunday	1213			AggPCC	1250	Sunday	1213			AggPCC	1250	Sunday	1213			AggPCC	1344	Sunday	1213
AggPCC	1000	Sunday	1314			AggPCC	1003	Sunday	1314			AggPCC	1004	Sunday	1314			AggPCC	1003	Sunday	1314			AggPCC	1000	Sunday	1314			AggPCC	1000	Sunday	1314			AggPCC	1056	Sunday	1314
AggPCC	1250	Sunday	1415			AggPCC	1253	Sunday	1415			AggPCC	1291	Sunday	1415			AggPCC	1311	Sunday	1415			AggPCC	1250	Sunday	1415			AggPCC	1250	Sunday	1415			AggPCC	1344	Sunday	1415
AggPCC	1250	Sunday	1516			AggPCC	1253	Sunday	1516			AggPCC	1291	Sunday	1516			AggPCC	1311	Sunday	1516			AggPCC	1250	Sunday	1516			AggPCC	1250	Sunday	1516			AggPCC	1344	Sunday	1516
AggPCC	1000	Sunday	1617			AggPCC	1003	Sunday	1617			AggPCC	1004	Sunday	1617			AggPCC	1003	Sunday	1617			AggPCC	1000	Sunday	1617			AggPCC	1000	Sunday	1617			AggPCC	1056	Sunday	1617
AggPCC	1250	Sunday	1718			AggPCC	1253	Sunday	1718			AggPCC	1291	Sunday	1718			AggPCC	1311	Sunday	1718			AggPCC	1250	Sunday	1718			AggPCC	1250	Sunday	1718			AggPCC	1344	Sunday	1718
AggPCC	1000	Sunday	1819			AggPCC	1003	Sunday	1819			AggPCC	1004	Sunday	1819			AggPCC	1003	Sunday	1819			AggPCC	1000	Sunday	1819			AggPCC	1000	Sunday	1819			AggPCC	1056	Sunday	1819
AggPCC	1250	Sunday	1920			AggPCC	1253	Sunday	1920			AggPCC	1291	Sunday	1920			AggPCC	1311	Sunday	1920			AggPCC	1250	Sunday	1920			AggPCC	1250	Sunday	1920			AggPCC	1344	Sunday	1920
AggPCC	1250	Sunday	2021			AggPCC	1253	Sunday	2021			AggPCC	1291	Sunday	2021			AggPCC	1311	Sunday	2021			AggPCC	1250	Sunday	2021			AggPCC	1250	Sunday	2021			AggPCC	1344	Sunday	2021
AggPCC	1000	Sunday	2122			AggPCC	1003	Sunday	2122			AggPCC	1004	Sunday	2122			AggPCC	1003	Sunday	2122			AggPCC	1000	Sunday	2122			AggPCC	1000	Sunday	2122			AggPCC	1056	Sunday	2122
AggPCC	1250	Sunday	2223			AggPCC	1253	Sunday	2223			AggPCC	1291	Sunday	2223			AggPCC	1311	Sunday	2223			AggPCC	1250	Sunday	2223			AggPCC	1250	Sunday	2223			AggPCC	1344	Sunday	2223
AggPCC	1000	Sunday	2324			AggPCC	1003	Sunday	2324			AggPCC	1004	Sunday	2324			AggPCC	1003	Sunday	2324			AggPCC	1000	Sunday	2324			AggPCC	1000	Sunday	2324			AggPCC	1056	Sunday	2324
AggPCC	750	Thursday	0506			AggPCC	770	Thursday	0506			AggPCC	750	Thursday	0506			AggPCC	770	Thursday	0506			AggPCC	750	Thursday	0506			AggPCC	750	Thursday	0506			AggPCC	768	Thursday	0506
AggPCC	1250	Thursday	0607			AggPCC	1253	Thursday	0607			AggPCC	1291	Thursday	0607			AggPCC	1311	Thursday	0607			AggPCC	1250	Thursday	0607			AggPCC	1250	Thursday	0607			AggPCC	1344	Thursday	0607
AggPCC	2000	Thursday	0708			AggPCC	2002	Thursday	0708			AggPCC	2020	Thursday	0708			AggPCC	2002	Thursday	0708			AggPCC	2020	Thursday	0708			AggPCC	2000	Thursday	0708			AggPCC	2016	Thursday	0708
AggPCC	1250	Thursday	0809			AggPCC	1253	Thursday	0809			AggPCC	1291	Thursday	0809			AggPCC	1311	Thursday	0809			AggPCC	1250	Thursday	0809			AggPCC	1250	Thursday	0809			AggPCC	1344	Thursday	0809
AggPCC	1500	Thursday	0910			AggPCC	1540	Thursday	0910			AggPCC	1541	Thursday	0910			AggPCC	1540	Thursday	0910			AggPCC	1520	Thursday	0910			AggPCC	1500	Thursday	0910			AggPCC	1536	Thursday	0910
AggPCC	1250	Thursday	1011			AggPCC	1253	Thursday	1011			AggPCC	1291	Thursday	1011			AggPCC	1311	Thursday	1011			AggPCC	1250	Thursday	1011			AggPCC	1250	Thursday	1011			AggPCC	1344	Thursday	1011
AggPCC	1500	Thursday	1112			AggPCC	1540	Thursday	1112			AggPCC	1541	Thursday	1112			AggPCC	1540	Thursday	1112			AggPCC	1520	Thursday	1112			AggPCC	1500	Thursday	1112			AggPCC	1536	Thursday	1112
AggPCC	1250	Thursday	1213			AggPCC	1253	Thursday	1213			AggPCC	1291	Thursday	1213			AggPCC	1311	Thursday	1213			AggPCC	1250	Thursday	1213			AggPCC	1250	Thursday	1213			AggPCC	1344	Thursday	1213
AggPCC	1250	Thursday	1314			AggPCC	1253	Thursday	1314			AggPCC	1291	Thursday	1314			AggPCC	1311	Thursday	1314			AggPCC	1250	Thursday	1314			AggPCC	1250	Thursday	1314			AggPCC	1344	Thursday	1314
AggPCC	1500	Thursday	1415			AggPCC	1540	Thursday	1415			AggPCC	1541	Thursday	1415			AggPCC	1540	Thursday	1415			AggPCC	1520	Thursday	1415			AggPCC	1500	Thursday	1415			AggPCC	1536	Thursday	1415
AggPCC	1250	Thursday	1516			AggPCC	1253	Thursday	1516			AggPCC	1291	Thursday	1516			AggPCC	1311	Thursday	1516			AggPCC	1250	Thursday	1516			AggPCC	1250	Thursday	1516			AggPCC	1344	Thursday	1516
AggPCC	1500	Thursday	1617			AggPCC	1540	Thursday	1617			AggPCC	1541	Thursday	1617			AggPCC	1540	Thursday	1617			AggPCC	1520	Thursday	1617			AggPCC	1500	Thursday	1617			AggPCC	1536	Thursday	1617
AggPCC	1750	Thursday	1718			AggPCC	1773	Thursday	1718			AggPCC	1770	Thursday	1718			AggPCC	1773	Thursday	1718			AggPCC	1770	Thursday	1718			AggPCC	1750	Thursday	1718			AggPCC	1824	Thursday	1718
AggPCC	2000	Thursday	1819			AggPCC	2002	Thursday	1819			AggPCC	2020	Thursday	1819			AggPCC	2002	Thursday	1819			AggPCC	2020	Thursday	1819			AggPCC	2000	Thursday	1819			AggPCC	2016	Thursday	1819
AggPCC	2000	Thursday	1920			AggPCC	2002	Thursday	1920			AggPCC	2020	Thursday	1920			AggPCC	2002	Thursday	1920			AggPCC	2020	Thursday	1920			AggPCC	2000	Thursday	1920			AggPCC	2016	Thursday	1920
AggPCC	1250	Thursday	2021			AggPCC	1253	Thursday	2021			AggPCC	1291	Thursday	2021			AggPCC	1311	Thursday	2021			AggPCC	1250	Thursday	2021			AggPCC	1250	Thursday	2021			AggPCC	1344	Thursday	2021
AggPCC	1500	Thursday	2122			AggPCC	1540	Thursday	2122			AggPCC	1541	Thursday	2122			AggPCC	1540	Thursday	2122			AggPCC	1520	Thursday	2122			AggPCC	1500	Thursday	2122			AggPCC	1536	Thursday	2122
AggPCC	1250	Thursday	2223			AggPCC	1253	Thursday	2223			AggPCC	1291	Thursday	2223			AggPCC	1311	Thursday	2223			AggPCC	1250	Thursday	2223			AggPCC	1250	Thursday	2223			AggPCC	1344	Thursday	2223
AggPCC	1250	Thursday	2324			AggPCC	1253	Thursday	2324			AggPCC	1291	Thursday	2324			AggPCC	1311	Thursday	2324			AggPCC	1250	Thursday	2324			AggPCC	1250	Thursday	2324			AggPCC	1344	Thursday	2324
AggPCC	750	Tuesday	0506			AggPCC	770	Tuesday	0506			AggPCC	750	Tuesday	0506			AggPCC	770	Tuesday	0506			AggPCC	750	Tuesday	0506			AggPCC	750	Tuesday	0506			AggPCC	768	Tuesday	0506
AggPCC	1250	Tuesday	0607			AggPCC	1253	Tuesday	0607			AggPCC	1291	Tuesday	0607			AggPCC	1311	Tuesday	0607			AggPCC	1250	Tuesday	0607			AggPCC	1250	Tuesday	0607			AggPCC	1344	Tuesday	0607
AggPCC	2000	Tuesday	0708			AggPCC	2002	Tuesday	0708			AggPCC	2020	Tuesday	0708			AggPCC	2002	Tuesday	0708			AggPCC	2020	Tuesday	0708			AggPCC	2000	Tuesday	0708			AggPCC	2016	Tuesday	0708
AggPCC	1250	Tuesday	0809			AggPCC	1253	Tuesday	0809			AggPCC	1291	Tuesday	0809			AggPCC	1311	Tuesday	0809			AggPCC	1250	Tuesday	0809			AggPCC	1250	Tuesday	0809			AggPCC	1344	Tuesday	0809
AggPCC	1500	Tuesday	0910			AggPCC	1540	Tuesday	0910			AggPCC	1541	Tuesday	0910			AggPCC	1540	Tuesday	0910			AggPCC	1520	Tuesday	0910			AggPCC	1500	Tuesday	0910			AggPCC	1536	Tuesday	0910
AggPCC	1250	Tuesday	1011			AggPCC	1253	Tuesday	1011			AggPCC	1291	Tuesday	1011			AggPCC	1311	Tuesday	1011			AggPCC	1250	Tuesday	1011			AggPCC	1250	Tuesday	1011			AggPCC	1344	Tuesday	1011
AggPCC	1500	Tuesday	1112			AggPCC	1540	Tuesday	1112			AggPCC	1541	Tuesday	1112			AggPCC	1540	Tuesday	1112			AggPCC	1520	Tuesday	1112			AggPCC	1500	Tuesday	1112			AggPCC	1536	Tuesday	1112
AggPCC	1250	Tuesday	1213			AggPCC	1253	Tuesday	1213			AggPCC	1291	Tuesday	1213			AggPCC	1311	Tuesday	1213			AggPCC	1250	Tuesday	1213			AggPCC	1250	Tuesday	1213			AggPCC	1344	Tuesday	1213
AggPCC	1250	Tuesday	1314			AggPCC	1253	Tuesday	1314			AggPCC	1291	Tuesday	1314			AggPCC	1311	Tuesday	1314			AggPCC	1250	Tuesday	1314			AggPCC	1250	Tuesday	1314			AggPCC	1344	Tuesday	1314
AggPCC	1500	Tuesday	1415			AggPCC	1540	Tuesday	1415			AggPCC	1541	Tuesday	1415			AggPCC	1540	Tuesday	1415			AggPCC	1520	Tuesday	1415			AggPCC	1500	Tuesday	1415			AggPCC	1536	Tuesday	1415
AggPCC	1250	Tuesday	1516			AggPCC	1253	Tuesday	1516			AggPCC	1291	Tuesday	1516			AggPCC	1311	Tuesday	1516			AggPCC	1250	Tuesday	1516			AggPCC	1250	Tuesday	1516			AggPCC	1344	Tuesday	1516
AggPCC	1500	Tuesday	1617			AggPCC	1540	Tuesday	1617			AggPCC	1541	Tuesday	1617			AggPCC	1540	Tuesday	1617			AggPCC	1520	Tuesday	1617			AggPCC	1500	Tuesday	1617			AggPCC	1536	Tuesday	1617
AggPCC	1750	Tuesday	1718			AggPCC	1773	Tuesday	1718			AggPCC	1770	Tuesday	1718			AggPCC	1773	Tuesday	1718			AggPCC	1770	Tuesday	1718			AggPCC	1750	Tuesday	1718			AggPCC	1824	Tuesday	1718
AggPCC	2000	Tuesday	1819			AggPCC	2002	Tuesday	1819			AggPCC	2020	Tuesday	1819			AggPCC	2002	Tuesday	1819			AggPCC	2020	Tuesday	1819			AggPCC	2000	Tuesday	1819			AggPCC	2016	Tuesday	1819
AggPCC	2000	Tuesday	1920			AggPCC	2002	Tuesday	1920			AggPCC	2020	Tuesday	1920			AggPCC	2002	Tuesday	1920			AggPCC	2020	Tuesday	1920			AggPCC	2000	Tuesday	1920			AggPCC	2016	Tuesday	1920
AggPCC	1250	Tuesday	2021			AggPCC	1253	Tuesday	2021			AggPCC	1291	Tuesday	2021			AggPCC	1311	Tuesday	2021			AggPCC	1250	Tuesday	2021			AggPCC	1250	Tuesday	2021			AggPCC	1344	Tuesday	2021
AggPCC	1500	Tuesday	2122			AggPCC	1540	Tuesday	2122			AggPCC	1541	Tuesday	2122			AggPCC	1540	Tuesday	2122			AggPCC	1520	Tuesday	2122			AggPCC	1500	Tuesday	2122			AggPCC	1536	Tuesday	2122
AggPCC	1250	Tuesday	2223			AggPCC	1253	Tuesday	2223			AggPCC	1291	Tuesday	2223			AggPCC	1311	Tuesday	2223			AggPCC	1250	Tuesday	2223			AggPCC	1250	Tuesday	2223			AggPCC	1344	Tuesday	2223
AggPCC	1250	Tuesday	2324			AggPCC	1253	Tuesday	2324			AggPCC	1291	Tuesday	2324			AggPCC	1311	Tuesday	2324			AggPCC	1250	Tuesday	2324			AggPCC	1250	Tuesday	2324			AggPCC	1344	Tuesday	2324
AggPCC	750	Wednesday	0506			AggPCC	770	Wednesday	0506			AggPCC	750	Wednesday	0506			AggPCC	770	Wednesday	0506			AggPCC	750	Wednesday	0506			AggPCC	750	Wednesday	0506			AggPCC	768	Wednesday	0506
AggPCC	1250	Wednesday	0607			AggPCC	1253	Wednesday	0607			AggPCC	1291	Wednesday	0607			AggPCC	1311	Wednesday	0607			AggPCC	1250	Wednesday	0607			AggPCC	1250	Wednesday	0607			AggPCC	1344	Wednesday	0607
AggPCC	2000	Wednesday	0708			AggPCC	2002	Wednesday	0708			AggPCC	2020	Wednesday	0708			AggPCC	2002	Wednesday	0708			AggPCC	2020	Wednesday	0708			AggPCC	2000	Wednesday	0708			AggPCC	2016	Wednesday	0708
AggPCC	1250	Wednesday	0809			AggPCC	1253	Wednesday	0809			AggPCC	1291	Wednesday	0809			AggPCC	1311	Wednesday	0809			AggPCC	1250	Wednesday	0809			AggPCC	1250	Wednesday	0809			AggPCC	1344	Wednesday	0809
AggPCC	1500	Wednesday	0910			AggPCC	1540	Wednesday	0910			AggPCC	1541	Wednesday	0910			AggPCC	1540	Wednesday	0910			AggPCC	1520	Wednesday	0910			AggPCC	1500	Wednesday	0910			AggPCC	1536	Wednesday	0910
AggPCC	1250	Wednesday	1011			AggPCC	1253	Wednesday	1011			AggPCC	1291	Wednesday	1011			AggPCC	1311	Wednesday	1011			AggPCC	1250	Wednesday	1011			AggPCC	1250	Wednesday	1011			AggPCC	1344	Wednesday	1011
AggPCC	1500	Wednesday	1112			AggPCC	1540	Wednesday	1112			AggPCC	1541	Wednesday	1112			AggPCC	1540	Wednesday	1112			AggPCC	1520	Wednesday	1112			AggPCC	1500	Wednesday	1112			AggPCC	1536	Wednesday	1112
AggPCC	1250	Wednesday	1213			AggPCC	1253	Wednesday	1213			AggPCC	1291	Wednesday	1213			AggPCC	1311	Wednesday	1213			AggPCC	1250	Wednesday	1213			AggPCC	1250	Wednesday	1213			AggPCC	1344	Wednesday	1213
AggPCC	1250	Wednesday	1314			AggPCC	1253	Wednesday	1314			AggPCC	1291	Wednesday	1314			AggPCC	1311	Wednesday	1314			AggPCC	1250	Wednesday	1314			AggPCC	1250	Wednesday	1314			AggPCC	1344	Wednesday	1314
AggPCC	1500	Wednesday	1415			AggPCC	1540	Wednesday	1415			AggPCC	1541	Wednesday	1415			AggPCC	1540	Wednesday	1415			AggPCC	1520	Wednesday	1415			AggPCC	1500	Wednesday	1415			AggPCC	1536	Wednesday	1415
AggPCC	1250	Wednesday	1516			AggPCC	1253	Wednesday	1516			AggPCC	1291	Wednesday	1516			AggPCC	1311	Wednesday	1516			AggPCC	1250	Wednesday	1516			AggPCC	1250	Wednesday	1516			AggPCC	1344	Wednesday	1516
AggPCC	1500	Wednesday	1617			AggPCC	1540	Wednesday	1617			AggPCC	1541	Wednesday	1617			AggPCC	1540	Wednesday	1617			AggPCC	1520	Wednesday	1617			AggPCC	1500	Wednesday	1617			AggPCC	1536	Wednesday	1617
AggPCC	1750	Wednesday	1718			AggPCC	1773	Wednesday	1718			AggPCC	1770	Wednesday	1718			AggPCC	1773	Wednesday	1718			AggPCC	1770	Wednesday	1718			AggPCC	1750	Wednesday	1718			AggPCC	1824	Wednesday	1718
AggPCC	2000	Wednesday	1819			AggPCC	2002	Wednesday	1819			AggPCC	2020	Wednesday	1819			AggPCC	2002	Wednesday	1819			AggPCC	2020	Wednesday	1819			AggPCC	2000	Wednesday	1819			AggPCC	2016	Wednesday	1819
AggPCC	2000	Wednesday	1920			AggPCC	2002	Wednesday	1920			AggPCC	2020	Wednesday	1920			AggPCC	2002	Wednesday	1920			AggPCC	2020	Wednesday	1920			AggPCC	2000	Wednesday	1920			AggPCC	2016	Wednesday	1920
AggPCC	1250	Wednesday	2021			AggPCC	1253	Wednesday	2021			AggPCC	1291	Wednesday	2021			AggPCC	1311	Wednesday	2021			AggPCC	1250	Wednesday	2021			AggPCC	1250	Wednesday	2021			AggPCC	1344	Wednesday	2021
AggPCC	1500	Wednesday	2122			AggPCC	1540	Wednesday	2122			AggPCC	1541	Wednesday	2122			AggPCC	1540	Wednesday	2122			AggPCC	1520	Wednesday	2122			AggPCC	1500	Wednesday	2122			AggPCC	1536	Wednesday	2122
AggPCC	1250	Wednesday	2223			AggPCC	1253	Wednesday	2223			AggPCC	1291	Wednesday	2223			AggPCC	1311	Wednesday	2223			AggPCC	1250	Wednesday	2223			AggPCC	1250	Wednesday	2223			AggPCC	1344	Wednesday	2223
AggPCC	1250	Wednesday	2324			AggPCC	1253	Wednesday	2324			AggPCC	1291	Wednesday	2324			AggPCC	1311	Wednesday	2324			AggPCC	1250	Wednesday	2324			AggPCC	1250	Wednesday	2324			AggPCC	1344	Wednesday	2324
num	3	Friday	0506	ConvBi		num	0	Friday	0506	ConvBi		num	2	Friday	0506	ConvBi		num	0	Friday	0506	ConvBi		num	0	Friday	0506	ConvBi		num	0	Friday	0506	ConvBi		num	0	Friday	0506	ConvBi
num	0	Friday	0506	HybAr		num	5	Friday	0506	HybAr		num	1	Friday	0506	HybAr		num	5	Friday	0506	HybAr		num	3	Friday	0506	HybAr		num	3	Friday	0506	HybAr		num	0	Friday	0506	HybAr
num	0	Friday	0506	HybTw		num	0	Friday	0506	HybTw		num	0	Friday	0506	HybTw		num	0	Friday	0506	HybTw		num	0	Friday	0506	HybTw		num	0	Friday	0506	HybTw		num	0	Friday	0506	HybTw
num	0	Friday	0506	PlugTw		num	0	Friday	0506	PlugTw		num	1	Friday	0506	PlugTw		num	0	Friday	0506	PlugTw		num	3	Friday	0506	PlugTw		num	3	Friday	0506	PlugTw		num	8	Friday	0506	PlugTw
num	5	Friday	0607	ConvBi		num	0	Friday	0607	ConvBi		num	3	Friday	0607	ConvBi		num	0	Friday	0607	ConvBi		num	0	Friday	0607	ConvBi		num	0	Friday	0607	ConvBi		num	0	Friday	0607	ConvBi
num	0	Friday	0607	HybAr		num	7	Friday	0607	HybAr		num	3	Friday	0607	HybAr		num	8	Friday	0607	HybAr		num	5	Friday	0607	HybAr		num	5	Friday	0607	HybAr		num	0	Friday	0607	HybAr
num	0	Friday	0607	HybTw		num	1	Friday	0607	HybTw		num	1	Friday	0607	HybTw		num	1	Friday	0607	HybTw		num	0	Friday	0607	HybTw		num	0	Friday	0607	HybTw		num	0	Friday	0607	HybTw
num	0	Friday	0607	PlugTw		num	1	Friday	0607	PlugTw		num	0	Friday	0607	PlugTw		num	0	Friday	0607	PlugTw		num	5	Friday	0607	PlugTw		num	5	Friday	0607	PlugTw		num	14	Friday	0607	PlugTw
num	8	Friday	0708	ConvBi		num	0	Friday	0708	ConvBi		num	5	Friday	0708	ConvBi		num	0	Friday	0708	ConvBi		num	0	Friday	0708	ConvBi		num	0	Friday	0708	ConvBi		num	0	Friday	0708	ConvBi
num	0	Friday	0708	HybAr		num	13	Friday	0708	HybAr		num	5	Friday	0708	HybAr		num	13	Friday	0708	HybAr		num	10	Friday	0708	HybAr		num	8	Friday	0708	HybAr		num	0	Friday	0708	HybAr
num	0	Friday	0708	HybTw		num	0	Friday	0708	HybTw		num	0	Friday	0708	HybTw		num	0	Friday	0708	HybTw		num	0	Friday	0708	HybTw		num	0	Friday	0708	HybTw		num	0	Friday	0708	HybTw
num	0	Friday	0708	PlugTw		num	0	Friday	0708	PlugTw		num	0	Friday	0708	PlugTw		num	0	Friday	0708	PlugTw		num	5	Friday	0708	PlugTw		num	8	Friday	0708	PlugTw		num	21	Friday	0708	PlugTw
num	5	Friday	0809	ConvBi		num	0	Friday	0809	ConvBi		num	3	Friday	0809	ConvBi		num	0	Friday	0809	ConvBi		num	0	Friday	0809	ConvBi		num	0	Friday	0809	ConvBi		num	0	Friday	0809	ConvBi
num	0	Friday	0809	HybAr		num	7	Friday	0809	HybAr		num	3	Friday	0809	HybAr		num	8	Friday	0809	HybAr		num	5	Friday	0809	HybAr		num	5	Friday	0809	HybAr		num	0	Friday	0809	HybAr
num	0	Friday	0809	HybTw		num	1	Friday	0809	HybTw		num	1	Friday	0809	HybTw		num	1	Friday	0809	HybTw		num	0	Friday	0809	HybTw		num	0	Friday	0809	HybTw		num	0	Friday	0809	HybTw
num	0	Friday	0809	PlugTw		num	1	Friday	0809	PlugTw		num	0	Friday	0809	PlugTw		num	0	Friday	0809	PlugTw		num	5	Friday	0809	PlugTw		num	5	Friday	0809	PlugTw		num	14	Friday	0809	PlugTw
num	6	Friday	0910	ConvBi		num	0	Friday	0910	ConvBi		num	4	Friday	0910	ConvBi		num	0	Friday	0910	ConvBi		num	0	Friday	0910	ConvBi		num	0	Friday	0910	ConvBi		num	0	Friday	0910	ConvBi
num	0	Friday	0910	HybAr		num	10	Friday	0910	HybAr		num	3	Friday	0910	HybAr		num	10	Friday	0910	HybAr		num	8	Friday	0910	HybAr		num	6	Friday	0910	HybAr		num	0	Friday	0910	HybAr
num	0	Friday	0910	HybTw		num	0	Friday	0910	HybTw		num	1	Friday	0910	HybTw		num	0	Friday	0910	HybTw		num	0	Friday	0910	HybTw		num	0	Friday	0910	HybTw		num	0	Friday	0910	HybTw
num	0	Friday	0910	PlugTw		num	0	Friday	0910	PlugTw		num	0	Friday	0910	PlugTw		num	0	Friday	0910	PlugTw		num	3	Friday	0910	PlugTw		num	6	Friday	0910	PlugTw		num	16	Friday	0910	PlugTw
num	5	Friday	1011	ConvBi		num	0	Friday	1011	ConvBi		num	3	Friday	1011	ConvBi		num	0	Friday	1011	ConvBi		num	0	Friday	1011	ConvBi		num	0	Friday	1011	ConvBi		num	0	Friday	1011	ConvBi
num	0	Friday	1011	HybAr		num	7	Friday	1011	HybAr		num	3	Friday	1011	HybAr		num	8	Friday	1011	HybAr		num	5	Friday	1011	HybAr		num	5	Friday	1011	HybAr		num	0	Friday	1011	HybAr
num	0	Friday	1011	HybTw		num	1	Friday	1011	HybTw		num	1	Friday	1011	HybTw		num	1	Friday	1011	HybTw		num	0	Friday	1011	HybTw		num	0	Friday	1011	HybTw		num	0	Friday	1011	HybTw
num	0	Friday	1011	PlugTw		num	1	Friday	1011	PlugTw		num	0	Friday	1011	PlugTw		num	0	Friday	1011	PlugTw		num	5	Friday	1011	PlugTw		num	5	Friday	1011	PlugTw		num	14	Friday	1011	PlugTw
num	6	Friday	1112	ConvBi		num	0	Friday	1112	ConvBi		num	4	Friday	1112	ConvBi		num	0	Friday	1112	ConvBi		num	0	Friday	1112	ConvBi		num	0	Friday	1112	ConvBi		num	0	Friday	1112	ConvBi
num	0	Friday	1112	HybAr		num	10	Friday	1112	HybAr		num	3	Friday	1112	HybAr		num	10	Friday	1112	HybAr		num	8	Friday	1112	HybAr		num	6	Friday	1112	HybAr		num	0	Friday	1112	HybAr
num	0	Friday	1112	HybTw		num	0	Friday	1112	HybTw		num	1	Friday	1112	HybTw		num	0	Friday	1112	HybTw		num	0	Friday	1112	HybTw		num	0	Friday	1112	HybTw		num	0	Friday	1112	HybTw
num	0	Friday	1112	PlugTw		num	0	Friday	1112	PlugTw		num	0	Friday	1112	PlugTw		num	0	Friday	1112	PlugTw		num	3	Friday	1112	PlugTw		num	6	Friday	1112	PlugTw		num	16	Friday	1112	PlugTw
num	5	Friday	1213	ConvBi		num	0	Friday	1213	ConvBi		num	3	Friday	1213	ConvBi		num	0	Friday	1213	ConvBi		num	0	Friday	1213	ConvBi		num	0	Friday	1213	ConvBi		num	0	Friday	1213	ConvBi
num	0	Friday	1213	HybAr		num	7	Friday	1213	HybAr		num	3	Friday	1213	HybAr		num	8	Friday	1213	HybAr		num	5	Friday	1213	HybAr		num	5	Friday	1213	HybAr		num	0	Friday	1213	HybAr
num	0	Friday	1213	HybTw		num	1	Friday	1213	HybTw		num	1	Friday	1213	HybTw		num	1	Friday	1213	HybTw		num	0	Friday	1213	HybTw		num	0	Friday	1213	HybTw		num	0	Friday	1213	HybTw
num	0	Friday	1213	PlugTw		num	1	Friday	1213	PlugTw		num	0	Friday	1213	PlugTw		num	0	Friday	1213	PlugTw		num	5	Friday	1213	PlugTw		num	5	Friday	1213	PlugTw		num	14	Friday	1213	PlugTw
num	5	Friday	1314	ConvBi		num	0	Friday	1314	ConvBi		num	3	Friday	1314	ConvBi		num	0	Friday	1314	ConvBi		num	0	Friday	1314	ConvBi		num	0	Friday	1314	ConvBi		num	0	Friday	1314	ConvBi
num	0	Friday	1314	HybAr		num	7	Friday	1314	HybAr		num	3	Friday	1314	HybAr		num	8	Friday	1314	HybAr		num	5	Friday	1314	HybAr		num	5	Friday	1314	HybAr		num	0	Friday	1314	HybAr
num	0	Friday	1314	HybTw		num	1	Friday	1314	HybTw		num	1	Friday	1314	HybTw		num	1	Friday	1314	HybTw		num	0	Friday	1314	HybTw		num	0	Friday	1314	HybTw		num	0	Friday	1314	HybTw
num	0	Friday	1314	PlugTw		num	1	Friday	1314	PlugTw		num	0	Friday	1314	PlugTw		num	0	Friday	1314	PlugTw		num	5	Friday	1314	PlugTw		num	5	Friday	1314	PlugTw		num	14	Friday	1314	PlugTw
num	6	Friday	1415	ConvBi		num	0	Friday	1415	ConvBi		num	4	Friday	1415	ConvBi		num	0	Friday	1415	ConvBi		num	0	Friday	1415	ConvBi		num	0	Friday	1415	ConvBi		num	0	Friday	1415	ConvBi
num	0	Friday	1415	HybAr		num	10	Friday	1415	HybAr		num	3	Friday	1415	HybAr		num	10	Friday	1415	HybAr		num	8	Friday	1415	HybAr		num	6	Friday	1415	HybAr		num	0	Friday	1415	HybAr
num	0	Friday	1415	HybTw		num	0	Friday	1415	HybTw		num	1	Friday	1415	HybTw		num	0	Friday	1415	HybTw		num	0	Friday	1415	HybTw		num	0	Friday	1415	HybTw		num	0	Friday	1415	HybTw
num	0	Friday	1415	PlugTw		num	0	Friday	1415	PlugTw		num	0	Friday	1415	PlugTw		num	0	Friday	1415	PlugTw		num	3	Friday	1415	PlugTw		num	6	Friday	1415	PlugTw		num	16	Friday	1415	PlugTw
num	5	Friday	1516	ConvBi		num	0	Friday	1516	ConvBi		num	3	Friday	1516	ConvBi		num	0	Friday	1516	ConvBi		num	0	Friday	1516	ConvBi		num	0	Friday	1516	ConvBi		num	0	Friday	1516	ConvBi
num	0	Friday	1516	HybAr		num	7	Friday	1516	HybAr		num	3	Friday	1516	HybAr		num	8	Friday	1516	HybAr		num	5	Friday	1516	HybAr		num	5	Friday	1516	HybAr		num	0	Friday	1516	HybAr
num	0	Friday	1516	HybTw		num	1	Friday	1516	HybTw		num	1	Friday	1516	HybTw		num	1	Friday	1516	HybTw		num	0	Friday	1516	HybTw		num	0	Friday	1516	HybTw		num	0	Friday	1516	HybTw
num	0	Friday	1516	PlugTw		num	1	Friday	1516	PlugTw		num	0	Friday	1516	PlugTw		num	0	Friday	1516	PlugTw		num	5	Friday	1516	PlugTw		num	5	Friday	1516	PlugTw		num	14	Friday	1516	PlugTw
num	6	Friday	1617	ConvBi		num	0	Friday	1617	ConvBi		num	4	Friday	1617	ConvBi		num	0	Friday	1617	ConvBi		num	0	Friday	1617	ConvBi		num	0	Friday	1617	ConvBi		num	0	Friday	1617	ConvBi
num	0	Friday	1617	HybAr		num	10	Friday	1617	HybAr		num	3	Friday	1617	HybAr		num	10	Friday	1617	HybAr		num	8	Friday	1617	HybAr		num	6	Friday	1617	HybAr		num	0	Friday	1617	HybAr
num	0	Friday	1617	HybTw		num	0	Friday	1617	HybTw		num	1	Friday	1617	HybTw		num	0	Friday	1617	HybTw		num	0	Friday	1617	HybTw		num	0	Friday	1617	HybTw		num	0	Friday	1617	HybTw
num	0	Friday	1617	PlugTw		num	0	Friday	1617	PlugTw		num	0	Friday	1617	PlugTw		num	0	Friday	1617	PlugTw		num	3	Friday	1617	PlugTw		num	6	Friday	1617	PlugTw		num	16	Friday	1617	PlugTw
num	7	Friday	1718	ConvBi		num	0	Friday	1718	ConvBi		num	4	Friday	1718	ConvBi		num	0	Friday	1718	ConvBi		num	0	Friday	1718	ConvBi		num	0	Friday	1718	ConvBi		num	0	Friday	1718	ConvBi
num	0	Friday	1718	HybAr		num	11	Friday	1718	HybAr		num	5	Friday	1718	HybAr		num	11	Friday	1718	HybAr		num	9	Friday	1718	HybAr		num	7	Friday	1718	HybAr		num	0	Friday	1718	HybAr
num	0	Friday	1718	HybTw		num	1	Friday	1718	HybTw		num	0	Friday	1718	HybTw		num	1	Friday	1718	HybTw		num	0	Friday	1718	HybTw		num	0	Friday	1718	HybTw		num	0	Friday	1718	HybTw
num	0	Friday	1718	PlugTw		num	0	Friday	1718	PlugTw		num	0	Friday	1718	PlugTw		num	0	Friday	1718	PlugTw		num	4	Friday	1718	PlugTw		num	7	Friday	1718	PlugTw		num	19	Friday	1718	PlugTw
num	8	Friday	1819	ConvBi		num	0	Friday	1819	ConvBi		num	5	Friday	1819	ConvBi		num	0	Friday	1819	ConvBi		num	0	Friday	1819	ConvBi		num	0	Friday	1819	ConvBi		num	0	Friday	1819	ConvBi
num	0	Friday	1819	HybAr		num	13	Friday	1819	HybAr		num	5	Friday	1819	HybAr		num	13	Friday	1819	HybAr		num	10	Friday	1819	HybAr		num	8	Friday	1819	HybAr		num	0	Friday	1819	HybAr
num	0	Friday	1819	HybTw		num	0	Friday	1819	HybTw		num	0	Friday	1819	HybTw		num	0	Friday	1819	HybTw		num	0	Friday	1819	HybTw		num	0	Friday	1819	HybTw		num	0	Friday	1819	HybTw
num	0	Friday	1819	PlugTw		num	0	Friday	1819	PlugTw		num	0	Friday	1819	PlugTw		num	0	Friday	1819	PlugTw		num	5	Friday	1819	PlugTw		num	8	Friday	1819	PlugTw		num	21	Friday	1819	PlugTw
num	8	Friday	1920	ConvBi		num	0	Friday	1920	ConvBi		num	5	Friday	1920	ConvBi		num	0	Friday	1920	ConvBi		num	0	Friday	1920	ConvBi		num	0	Friday	1920	ConvBi		num	0	Friday	1920	ConvBi
num	0	Friday	1920	HybAr		num	13	Friday	1920	HybAr		num	5	Friday	1920	HybAr		num	13	Friday	1920	HybAr		num	10	Friday	1920	HybAr		num	8	Friday	1920	HybAr		num	0	Friday	1920	HybAr
num	0	Friday	1920	HybTw		num	0	Friday	1920	HybTw		num	0	Friday	1920	HybTw		num	0	Friday	1920	HybTw		num	0	Friday	1920	HybTw		num	0	Friday	1920	HybTw		num	0	Friday	1920	HybTw
num	0	Friday	1920	PlugTw		num	0	Friday	1920	PlugTw		num	0	Friday	1920	PlugTw		num	0	Friday	1920	PlugTw		num	5	Friday	1920	PlugTw		num	8	Friday	1920	PlugTw		num	21	Friday	1920	PlugTw
num	5	Friday	2021	ConvBi		num	0	Friday	2021	ConvBi		num	3	Friday	2021	ConvBi		num	0	Friday	2021	ConvBi		num	0	Friday	2021	ConvBi		num	0	Friday	2021	ConvBi		num	0	Friday	2021	ConvBi
num	0	Friday	2021	HybAr		num	7	Friday	2021	HybAr		num	3	Friday	2021	HybAr		num	8	Friday	2021	HybAr		num	5	Friday	2021	HybAr		num	5	Friday	2021	HybAr		num	0	Friday	2021	HybAr
num	0	Friday	2021	HybTw		num	1	Friday	2021	HybTw		num	1	Friday	2021	HybTw		num	1	Friday	2021	HybTw		num	0	Friday	2021	HybTw		num	0	Friday	2021	HybTw		num	0	Friday	2021	HybTw
num	0	Friday	2021	PlugTw		num	1	Friday	2021	PlugTw		num	0	Friday	2021	PlugTw		num	0	Friday	2021	PlugTw		num	5	Friday	2021	PlugTw		num	5	Friday	2021	PlugTw		num	14	Friday	2021	PlugTw
num	6	Friday	2122	ConvBi		num	0	Friday	2122	ConvBi		num	4	Friday	2122	ConvBi		num	0	Friday	2122	ConvBi		num	0	Friday	2122	ConvBi		num	0	Friday	2122	ConvBi		num	0	Friday	2122	ConvBi
num	0	Friday	2122	HybAr		num	10	Friday	2122	HybAr		num	3	Friday	2122	HybAr		num	10	Friday	2122	HybAr		num	8	Friday	2122	HybAr		num	6	Friday	2122	HybAr		num	0	Friday	2122	HybAr
num	0	Friday	2122	HybTw		num	0	Friday	2122	HybTw		num	1	Friday	2122	HybTw		num	0	Friday	2122	HybTw		num	0	Friday	2122	HybTw		num	0	Friday	2122	HybTw		num	0	Friday	2122	HybTw
num	0	Friday	2122	PlugTw		num	0	Friday	2122	PlugTw		num	0	Friday	2122	PlugTw		num	0	Friday	2122	PlugTw		num	3	Friday	2122	PlugTw		num	6	Friday	2122	PlugTw		num	16	Friday	2122	PlugTw
num	5	Friday	2223	ConvBi		num	0	Friday	2223	ConvBi		num	3	Friday	2223	ConvBi		num	0	Friday	2223	ConvBi		num	0	Friday	2223	ConvBi		num	0	Friday	2223	ConvBi		num	0	Friday	2223	ConvBi
num	0	Friday	2223	HybAr		num	7	Friday	2223	HybAr		num	3	Friday	2223	HybAr		num	8	Friday	2223	HybAr		num	5	Friday	2223	HybAr		num	5	Friday	2223	HybAr		num	0	Friday	2223	HybAr
num	0	Friday	2223	HybTw		num	1	Friday	2223	HybTw		num	1	Friday	2223	HybTw		num	1	Friday	2223	HybTw		num	0	Friday	2223	HybTw		num	0	Friday	2223	HybTw		num	0	Friday	2223	HybTw
num	0	Friday	2223	PlugTw		num	1	Friday	2223	PlugTw		num	0	Friday	2223	PlugTw		num	0	Friday	2223	PlugTw		num	5	Friday	2223	PlugTw		num	5	Friday	2223	PlugTw		num	14	Friday	2223	PlugTw
num	5	Friday	2324	ConvBi		num	0	Friday	2324	ConvBi		num	3	Friday	2324	ConvBi		num	0	Friday	2324	ConvBi		num	0	Friday	2324	ConvBi		num	0	Friday	2324	ConvBi		num	0	Friday	2324	ConvBi
num	0	Friday	2324	HybAr		num	7	Friday	2324	HybAr		num	3	Friday	2324	HybAr		num	8	Friday	2324	HybAr		num	5	Friday	2324	HybAr		num	5	Friday	2324	HybAr		num	0	Friday	2324	HybAr
num	0	Friday	2324	HybTw		num	1	Friday	2324	HybTw		num	1	Friday	2324	HybTw		num	1	Friday	2324	HybTw		num	0	Friday	2324	HybTw		num	0	Friday	2324	HybTw		num	0	Friday	2324	HybTw
num	0	Friday	2324	PlugTw		num	1	Friday	2324	PlugTw		num	0	Friday	2324	PlugTw		num	0	Friday	2324	PlugTw		num	5	Friday	2324	PlugTw		num	5	Friday	2324	PlugTw		num	14	Friday	2324	PlugTw
num	3	Monday	0506	ConvBi		num	0	Monday	0506	ConvBi		num	2	Monday	0506	ConvBi		num	0	Monday	0506	ConvBi		num	0	Monday	0506	ConvBi		num	0	Monday	0506	ConvBi		num	0	Monday	0506	ConvBi
num	0	Monday	0506	HybAr		num	5	Monday	0506	HybAr		num	1	Monday	0506	HybAr		num	5	Monday	0506	HybAr		num	3	Monday	0506	HybAr		num	3	Monday	0506	HybAr		num	0	Monday	0506	HybAr
num	0	Monday	0506	HybTw		num	0	Monday	0506	HybTw		num	0	Monday	0506	HybTw		num	0	Monday	0506	HybTw		num	0	Monday	0506	HybTw		num	0	Monday	0506	HybTw		num	0	Monday	0506	HybTw
num	0	Monday	0506	PlugTw		num	0	Monday	0506	PlugTw		num	1	Monday	0506	PlugTw		num	0	Monday	0506	PlugTw		num	3	Monday	0506	PlugTw		num	3	Monday	0506	PlugTw		num	8	Monday	0506	PlugTw
num	5	Monday	0607	ConvBi		num	0	Monday	0607	ConvBi		num	3	Monday	0607	ConvBi		num	0	Monday	0607	ConvBi		num	0	Monday	0607	ConvBi		num	0	Monday	0607	ConvBi		num	0	Monday	0607	ConvBi
num	0	Monday	0607	HybAr		num	7	Monday	0607	HybAr		num	3	Monday	0607	HybAr		num	8	Monday	0607	HybAr		num	5	Monday	0607	HybAr		num	5	Monday	0607	HybAr		num	0	Monday	0607	HybAr
num	0	Monday	0607	HybTw		num	1	Monday	0607	HybTw		num	1	Monday	0607	HybTw		num	1	Monday	0607	HybTw		num	0	Monday	0607	HybTw		num	0	Monday	0607	HybTw		num	0	Monday	0607	HybTw
num	0	Monday	0607	PlugTw		num	1	Monday	0607	PlugTw		num	0	Monday	0607	PlugTw		num	0	Monday	0607	PlugTw		num	5	Monday	0607	PlugTw		num	5	Monday	0607	PlugTw		num	14	Monday	0607	PlugTw
num	8	Monday	0708	ConvBi		num	0	Monday	0708	ConvBi		num	5	Monday	0708	ConvBi		num	0	Monday	0708	ConvBi		num	0	Monday	0708	ConvBi		num	0	Monday	0708	ConvBi		num	0	Monday	0708	ConvBi
num	0	Monday	0708	HybAr		num	13	Monday	0708	HybAr		num	5	Monday	0708	HybAr		num	13	Monday	0708	HybAr		num	10	Monday	0708	HybAr		num	8	Monday	0708	HybAr		num	0	Monday	0708	HybAr
num	0	Monday	0708	HybTw		num	0	Monday	0708	HybTw		num	0	Monday	0708	HybTw		num	0	Monday	0708	HybTw		num	0	Monday	0708	HybTw		num	0	Monday	0708	HybTw		num	0	Monday	0708	HybTw
num	0	Monday	0708	PlugTw		num	0	Monday	0708	PlugTw		num	0	Monday	0708	PlugTw		num	0	Monday	0708	PlugTw		num	5	Monday	0708	PlugTw		num	8	Monday	0708	PlugTw		num	21	Monday	0708	PlugTw
num	5	Monday	0809	ConvBi		num	0	Monday	0809	ConvBi		num	3	Monday	0809	ConvBi		num	0	Monday	0809	ConvBi		num	0	Monday	0809	ConvBi		num	0	Monday	0809	ConvBi		num	0	Monday	0809	ConvBi
num	0	Monday	0809	HybAr		num	7	Monday	0809	HybAr		num	3	Monday	0809	HybAr		num	8	Monday	0809	HybAr		num	5	Monday	0809	HybAr		num	5	Monday	0809	HybAr		num	0	Monday	0809	HybAr
num	0	Monday	0809	HybTw		num	1	Monday	0809	HybTw		num	1	Monday	0809	HybTw		num	1	Monday	0809	HybTw		num	0	Monday	0809	HybTw		num	0	Monday	0809	HybTw		num	0	Monday	0809	HybTw
num	0	Monday	0809	PlugTw		num	1	Monday	0809	PlugTw		num	0	Monday	0809	PlugTw		num	0	Monday	0809	PlugTw		num	5	Monday	0809	PlugTw		num	5	Monday	0809	PlugTw		num	14	Monday	0809	PlugTw
num	6	Monday	0910	ConvBi		num	0	Monday	0910	ConvBi		num	4	Monday	0910	ConvBi		num	0	Monday	0910	ConvBi		num	0	Monday	0910	ConvBi		num	0	Monday	0910	ConvBi		num	0	Monday	0910	ConvBi
num	0	Monday	0910	HybAr		num	10	Monday	0910	HybAr		num	3	Monday	0910	HybAr		num	10	Monday	0910	HybAr		num	8	Monday	0910	HybAr		num	6	Monday	0910	HybAr		num	0	Monday	0910	HybAr
num	0	Monday	0910	HybTw		num	0	Monday	0910	HybTw		num	1	Monday	0910	HybTw		num	0	Monday	0910	HybTw		num	0	Monday	0910	HybTw		num	0	Monday	0910	HybTw		num	0	Monday	0910	HybTw
num	0	Monday	0910	PlugTw		num	0	Monday	0910	PlugTw		num	0	Monday	0910	PlugTw		num	0	Monday	0910	PlugTw		num	3	Monday	0910	PlugTw		num	6	Monday	0910	PlugTw		num	16	Monday	0910	PlugTw
num	5	Monday	1011	ConvBi		num	0	Monday	1011	ConvBi		num	3	Monday	1011	ConvBi		num	0	Monday	1011	ConvBi		num	0	Monday	1011	ConvBi		num	0	Monday	1011	ConvBi		num	0	Monday	1011	ConvBi
num	0	Monday	1011	HybAr		num	7	Monday	1011	HybAr		num	3	Monday	1011	HybAr		num	8	Monday	1011	HybAr		num	5	Monday	1011	HybAr		num	5	Monday	1011	HybAr		num	0	Monday	1011	HybAr
num	0	Monday	1011	HybTw		num	1	Monday	1011	HybTw		num	1	Monday	1011	HybTw		num	1	Monday	1011	HybTw		num	0	Monday	1011	HybTw		num	0	Monday	1011	HybTw		num	0	Monday	1011	HybTw
num	0	Monday	1011	PlugTw		num	1	Monday	1011	PlugTw		num	0	Monday	1011	PlugTw		num	0	Monday	1011	PlugTw		num	5	Monday	1011	PlugTw		num	5	Monday	1011	PlugTw		num	14	Monday	1011	PlugTw
num	6	Monday	1112	ConvBi		num	0	Monday	1112	ConvBi		num	4	Monday	1112	ConvBi		num	0	Monday	1112	ConvBi		num	0	Monday	1112	ConvBi		num	0	Monday	1112	ConvBi		num	0	Monday	1112	ConvBi
num	0	Monday	1112	HybAr		num	10	Monday	1112	HybAr		num	3	Monday	1112	HybAr		num	10	Monday	1112	HybAr		num	8	Monday	1112	HybAr		num	6	Monday	1112	HybAr		num	0	Monday	1112	HybAr
num	0	Monday	1112	HybTw		num	0	Monday	1112	HybTw		num	1	Monday	1112	HybTw		num	0	Monday	1112	HybTw		num	0	Monday	1112	HybTw		num	0	Monday	1112	HybTw		num	0	Monday	1112	HybTw
num	0	Monday	1112	PlugTw		num	0	Monday	1112	PlugTw		num	0	Monday	1112	PlugTw		num	0	Monday	1112	PlugTw		num	3	Monday	1112	PlugTw		num	6	Monday	1112	PlugTw		num	16	Monday	1112	PlugTw
num	5	Monday	1213	ConvBi		num	0	Monday	1213	ConvBi		num	3	Monday	1213	ConvBi		num	0	Monday	1213	ConvBi		num	0	Monday	1213	ConvBi		num	0	Monday	1213	ConvBi		num	0	Monday	1213	ConvBi
num	0	Monday	1213	HybAr		num	7	Monday	1213	HybAr		num	3	Monday	1213	HybAr		num	8	Monday	1213	HybAr		num	5	Monday	1213	HybAr		num	5	Monday	1213	HybAr		num	0	Monday	1213	HybAr
num	0	Monday	1213	HybTw		num	1	Monday	1213	HybTw		num	1	Monday	1213	HybTw		num	1	Monday	1213	HybTw		num	0	Monday	1213	HybTw		num	0	Monday	1213	HybTw		num	0	Monday	1213	HybTw
num	0	Monday	1213	PlugTw		num	1	Monday	1213	PlugTw		num	0	Monday	1213	PlugTw		num	0	Monday	1213	PlugTw		num	5	Monday	1213	PlugTw		num	5	Monday	1213	PlugTw		num	14	Monday	1213	PlugTw
num	5	Monday	1314	ConvBi		num	0	Monday	1314	ConvBi		num	3	Monday	1314	ConvBi		num	0	Monday	1314	ConvBi		num	0	Monday	1314	ConvBi		num	0	Monday	1314	ConvBi		num	0	Monday	1314	ConvBi
num	0	Monday	1314	HybAr		num	7	Monday	1314	HybAr		num	3	Monday	1314	HybAr		num	8	Monday	1314	HybAr		num	5	Monday	1314	HybAr		num	5	Monday	1314	HybAr		num	0	Monday	1314	HybAr
num	0	Monday	1314	HybTw		num	1	Monday	1314	HybTw		num	1	Monday	1314	HybTw		num	1	Monday	1314	HybTw		num	0	Monday	1314	HybTw		num	0	Monday	1314	HybTw		num	0	Monday	1314	HybTw
num	0	Monday	1314	PlugTw		num	1	Monday	1314	PlugTw		num	0	Monday	1314	PlugTw		num	0	Monday	1314	PlugTw		num	5	Monday	1314	PlugTw		num	5	Monday	1314	PlugTw		num	14	Monday	1314	PlugTw
num	6	Monday	1415	ConvBi		num	0	Monday	1415	ConvBi		num	4	Monday	1415	ConvBi		num	0	Monday	1415	ConvBi		num	0	Monday	1415	ConvBi		num	0	Monday	1415	ConvBi		num	0	Monday	1415	ConvBi
num	0	Monday	1415	HybAr		num	10	Monday	1415	HybAr		num	3	Monday	1415	HybAr		num	10	Monday	1415	HybAr		num	8	Monday	1415	HybAr		num	6	Monday	1415	HybAr		num	0	Monday	1415	HybAr
num	0	Monday	1415	HybTw		num	0	Monday	1415	HybTw		num	1	Monday	1415	HybTw		num	0	Monday	1415	HybTw		num	0	Monday	1415	HybTw		num	0	Monday	1415	HybTw		num	0	Monday	1415	HybTw
num	0	Monday	1415	PlugTw		num	0	Monday	1415	PlugTw		num	0	Monday	1415	PlugTw		num	0	Monday	1415	PlugTw		num	3	Monday	1415	PlugTw		num	6	Monday	1415	PlugTw		num	16	Monday	1415	PlugTw
num	5	Monday	1516	ConvBi		num	0	Monday	1516	ConvBi		num	3	Monday	1516	ConvBi		num	0	Monday	1516	ConvBi		num	0	Monday	1516	ConvBi		num	0	Monday	1516	ConvBi		num	0	Monday	1516	ConvBi
num	0	Monday	1516	HybAr		num	7	Monday	1516	HybAr		num	3	Monday	1516	HybAr		num	8	Monday	1516	HybAr		num	5	Monday	1516	HybAr		num	5	Monday	1516	HybAr		num	0	Monday	1516	HybAr
num	0	Monday	1516	HybTw		num	1	Monday	1516	HybTw		num	1	Monday	1516	HybTw		num	1	Monday	1516	HybTw		num	0	Monday	1516	HybTw		num	0	Monday	1516	HybTw		num	0	Monday	1516	HybTw
num	0	Monday	1516	PlugTw		num	1	Monday	1516	PlugTw		num	0	Monday	1516	PlugTw		num	0	Monday	1516	PlugTw		num	5	Monday	1516	PlugTw		num	5	Monday	1516	PlugTw		num	14	Monday	1516	PlugTw
num	6	Monday	1617	ConvBi		num	0	Monday	1617	ConvBi		num	4	Monday	1617	ConvBi		num	0	Monday	1617	ConvBi		num	0	Monday	1617	ConvBi		num	0	Monday	1617	ConvBi		num	0	Monday	1617	ConvBi
num	0	Monday	1617	HybAr		num	10	Monday	1617	HybAr		num	3	Monday	1617	HybAr		num	10	Monday	1617	HybAr		num	8	Monday	1617	HybAr		num	6	Monday	1617	HybAr		num	0	Monday	1617	HybAr
num	0	Monday	1617	HybTw		num	0	Monday	1617	HybTw		num	1	Monday	1617	HybTw		num	0	Monday	1617	HybTw		num	0	Monday	1617	HybTw		num	0	Monday	1617	HybTw		num	0	Monday	1617	HybTw
num	0	Monday	1617	PlugTw		num	0	Monday	1617	PlugTw		num	0	Monday	1617	PlugTw		num	0	Monday	1617	PlugTw		num	3	Monday	1617	PlugTw		num	6	Monday	1617	PlugTw		num	16	Monday	1617	PlugTw
num	7	Monday	1718	ConvBi		num	0	Monday	1718	ConvBi		num	4	Monday	1718	ConvBi		num	0	Monday	1718	ConvBi		num	0	Monday	1718	ConvBi		num	0	Monday	1718	ConvBi		num	0	Monday	1718	ConvBi
num	0	Monday	1718	HybAr		num	11	Monday	1718	HybAr		num	5	Monday	1718	HybAr		num	11	Monday	1718	HybAr		num	9	Monday	1718	HybAr		num	7	Monday	1718	HybAr		num	0	Monday	1718	HybAr
num	0	Monday	1718	HybTw		num	1	Monday	1718	HybTw		num	0	Monday	1718	HybTw		num	1	Monday	1718	HybTw		num	0	Monday	1718	HybTw		num	0	Monday	1718	HybTw		num	0	Monday	1718	HybTw
num	0	Monday	1718	PlugTw		num	0	Monday	1718	PlugTw		num	0	Monday	1718	PlugTw		num	0	Monday	1718	PlugTw		num	4	Monday	1718	PlugTw		num	7	Monday	1718	PlugTw		num	19	Monday	1718	PlugTw
num	8	Monday	1819	ConvBi		num	0	Monday	1819	ConvBi		num	5	Monday	1819	ConvBi		num	0	Monday	1819	ConvBi		num	0	Monday	1819	ConvBi		num	0	Monday	1819	ConvBi		num	0	Monday	1819	ConvBi
num	0	Monday	1819	HybAr		num	13	Monday	1819	HybAr		num	5	Monday	1819	HybAr		num	13	Monday	1819	HybAr		num	10	Monday	1819	HybAr		num	8	Monday	1819	HybAr		num	0	Monday	1819	HybAr
num	0	Monday	1819	HybTw		num	0	Monday	1819	HybTw		num	0	Monday	1819	HybTw		num	0	Monday	1819	HybTw		num	0	Monday	1819	HybTw		num	0	Monday	1819	HybTw		num	0	Monday	1819	HybTw
num	0	Monday	1819	PlugTw		num	0	Monday	1819	PlugTw		num	0	Monday	1819	PlugTw		num	0	Monday	1819	PlugTw		num	5	Monday	1819	PlugTw		num	8	Monday	1819	PlugTw		num	21	Monday	1819	PlugTw
num	8	Monday	1920	ConvBi		num	0	Monday	1920	ConvBi		num	5	Monday	1920	ConvBi		num	0	Monday	1920	ConvBi		num	0	Monday	1920	ConvBi		num	0	Monday	1920	ConvBi		num	0	Monday	1920	ConvBi
num	0	Monday	1920	HybAr		num	13	Monday	1920	HybAr		num	5	Monday	1920	HybAr		num	13	Monday	1920	HybAr		num	10	Monday	1920	HybAr		num	8	Monday	1920	HybAr		num	0	Monday	1920	HybAr
num	0	Monday	1920	HybTw		num	0	Monday	1920	HybTw		num	0	Monday	1920	HybTw		num	0	Monday	1920	HybTw		num	0	Monday	1920	HybTw		num	0	Monday	1920	HybTw		num	0	Monday	1920	HybTw
num	0	Monday	1920	PlugTw		num	0	Monday	1920	PlugTw		num	0	Monday	1920	PlugTw		num	0	Monday	1920	PlugTw		num	5	Monday	1920	PlugTw		num	8	Monday	1920	PlugTw		num	21	Monday	1920	PlugTw
num	5	Monday	2021	ConvBi		num	0	Monday	2021	ConvBi		num	3	Monday	2021	ConvBi		num	0	Monday	2021	ConvBi		num	0	Monday	2021	ConvBi		num	0	Monday	2021	ConvBi		num	0	Monday	2021	ConvBi
num	0	Monday	2021	HybAr		num	7	Monday	2021	HybAr		num	3	Monday	2021	HybAr		num	8	Monday	2021	HybAr		num	5	Monday	2021	HybAr		num	5	Monday	2021	HybAr		num	0	Monday	2021	HybAr
num	0	Monday	2021	HybTw		num	1	Monday	2021	HybTw		num	1	Monday	2021	HybTw		num	1	Monday	2021	HybTw		num	0	Monday	2021	HybTw		num	0	Monday	2021	HybTw		num	0	Monday	2021	HybTw
num	0	Monday	2021	PlugTw		num	1	Monday	2021	PlugTw		num	0	Monday	2021	PlugTw		num	0	Monday	2021	PlugTw		num	5	Monday	2021	PlugTw		num	5	Monday	2021	PlugTw		num	14	Monday	2021	PlugTw
num	6	Monday	2122	ConvBi		num	0	Monday	2122	ConvBi		num	4	Monday	2122	ConvBi		num	0	Monday	2122	ConvBi		num	0	Monday	2122	ConvBi		num	0	Monday	2122	ConvBi		num	0	Monday	2122	ConvBi
num	0	Monday	2122	HybAr		num	10	Monday	2122	HybAr		num	3	Monday	2122	HybAr		num	10	Monday	2122	HybAr		num	8	Monday	2122	HybAr		num	6	Monday	2122	HybAr		num	0	Monday	2122	HybAr
num	0	Monday	2122	HybTw		num	0	Monday	2122	HybTw		num	1	Monday	2122	HybTw		num	0	Monday	2122	HybTw		num	0	Monday	2122	HybTw		num	0	Monday	2122	HybTw		num	0	Monday	2122	HybTw
num	0	Monday	2122	PlugTw		num	0	Monday	2122	PlugTw		num	0	Monday	2122	PlugTw		num	0	Monday	2122	PlugTw		num	3	Monday	2122	PlugTw		num	6	Monday	2122	PlugTw		num	16	Monday	2122	PlugTw
num	5	Monday	2223	ConvBi		num	0	Monday	2223	ConvBi		num	3	Monday	2223	ConvBi		num	0	Monday	2223	ConvBi		num	0	Monday	2223	ConvBi		num	0	Monday	2223	ConvBi		num	0	Monday	2223	ConvBi
num	0	Monday	2223	HybAr		num	7	Monday	2223	HybAr		num	3	Monday	2223	HybAr		num	8	Monday	2223	HybAr		num	5	Monday	2223	HybAr		num	5	Monday	2223	HybAr		num	0	Monday	2223	HybAr
num	0	Monday	2223	HybTw		num	1	Monday	2223	HybTw		num	1	Monday	2223	HybTw		num	1	Monday	2223	HybTw		num	0	Monday	2223	HybTw		num	0	Monday	2223	HybTw		num	0	Monday	2223	HybTw
num	0	Monday	2223	PlugTw		num	1	Monday	2223	PlugTw		num	0	Monday	2223	PlugTw		num	0	Monday	2223	PlugTw		num	5	Monday	2223	PlugTw		num	5	Monday	2223	PlugTw		num	14	Monday	2223	PlugTw
num	5	Monday	2324	ConvBi		num	0	Monday	2324	ConvBi		num	3	Monday	2324	ConvBi		num	0	Monday	2324	ConvBi		num	0	Monday	2324	ConvBi		num	0	Monday	2324	ConvBi		num	0	Monday	2324	ConvBi
num	0	Monday	2324	HybAr		num	7	Monday	2324	HybAr		num	3	Monday	2324	HybAr		num	8	Monday	2324	HybAr		num	5	Monday	2324	HybAr		num	5	Monday	2324	HybAr		num	0	Monday	2324	HybAr
num	0	Monday	2324	HybTw		num	1	Monday	2324	HybTw		num	1	Monday	2324	HybTw		num	1	Monday	2324	HybTw		num	0	Monday	2324	HybTw		num	0	Monday	2324	HybTw		num	0	Monday	2324	HybTw
num	0	Monday	2324	PlugTw		num	1	Monday	2324	PlugTw		num	0	Monday	2324	PlugTw		num	0	Monday	2324	PlugTw		num	5	Monday	2324	PlugTw		num	5	Monday	2324	PlugTw		num	14	Monday	2324	PlugTw
num	1	Saturday	0506	ConvBi		num	0	Saturday	0506	ConvBi		num	1	Saturday	0506	ConvBi		num	0	Saturday	0506	ConvBi		num	0	Saturday	0506	ConvBi		num	0	Saturday	0506	ConvBi		num	0	Saturday	0506	ConvBi
num	0	Saturday	0506	HybAr		num	1	Saturday	0506	HybAr		num	0	Saturday	0506	HybAr		num	2	Saturday	0506	HybAr		num	1	Saturday	0506	HybAr		num	1	Saturday	0506	HybAr		num	0	Saturday	0506	HybAr
num	0	Saturday	0506	HybTw		num	0	Saturday	0506	HybTw		num	1	Saturday	0506	HybTw		num	0	Saturday	0506	HybTw		num	0	Saturday	0506	HybTw		num	0	Saturday	0506	HybTw		num	0	Saturday	0506	HybTw
num	0	Saturday	0506	PlugTw		num	1	Saturday	0506	PlugTw		num	0	Saturday	0506	PlugTw		num	0	Saturday	0506	PlugTw		num	1	Saturday	0506	PlugTw		num	1	Saturday	0506	PlugTw		num	3	Saturday	0506	PlugTw
num	7	Saturday	0607	ConvBi		num	0	Saturday	0607	ConvBi		num	4	Saturday	0607	ConvBi		num	0	Saturday	0607	ConvBi		num	0	Saturday	0607	ConvBi		num	0	Saturday	0607	ConvBi		num	0	Saturday	0607	ConvBi
num	0	Saturday	0607	HybAr		num	11	Saturday	0607	HybAr		num	5	Saturday	0607	HybAr		num	11	Saturday	0607	HybAr		num	9	Saturday	0607	HybAr		num	7	Saturday	0607	HybAr		num	0	Saturday	0607	HybAr
num	0	Saturday	0607	HybTw		num	1	Saturday	0607	HybTw		num	0	Saturday	0607	HybTw		num	1	Saturday	0607	HybTw		num	0	Saturday	0607	HybTw		num	0	Saturday	0607	HybTw		num	0	Saturday	0607	HybTw
num	0	Saturday	0607	PlugTw		num	0	Saturday	0607	PlugTw		num	0	Saturday	0607	PlugTw		num	0	Saturday	0607	PlugTw		num	4	Saturday	0607	PlugTw		num	7	Saturday	0607	PlugTw		num	19	Saturday	0607	PlugTw
num	6	Saturday	0708	ConvBi		num	0	Saturday	0708	ConvBi		num	4	Saturday	0708	ConvBi		num	0	Saturday	0708	ConvBi		num	0	Saturday	0708	ConvBi		num	0	Saturday	0708	ConvBi		num	0	Saturday	0708	ConvBi
num	0	Saturday	0708	HybAr		num	10	Saturday	0708	HybAr		num	3	Saturday	0708	HybAr		num	10	Saturday	0708	HybAr		num	8	Saturday	0708	HybAr		num	6	Saturday	0708	HybAr		num	0	Saturday	0708	HybAr
num	0	Saturday	0708	HybTw		num	0	Saturday	0708	HybTw		num	1	Saturday	0708	HybTw		num	0	Saturday	0708	HybTw		num	0	Saturday	0708	HybTw		num	0	Saturday	0708	HybTw		num	0	Saturday	0708	HybTw
num	0	Saturday	0708	PlugTw		num	0	Saturday	0708	PlugTw		num	0	Saturday	0708	PlugTw		num	0	Saturday	0708	PlugTw		num	3	Saturday	0708	PlugTw		num	6	Saturday	0708	PlugTw		num	16	Saturday	0708	PlugTw
num	6	Saturday	0809	ConvBi		num	0	Saturday	0809	ConvBi		num	4	Saturday	0809	ConvBi		num	0	Saturday	0809	ConvBi		num	0	Saturday	0809	ConvBi		num	0	Saturday	0809	ConvBi		num	0	Saturday	0809	ConvBi
num	0	Saturday	0809	HybAr		num	10	Saturday	0809	HybAr		num	3	Saturday	0809	HybAr		num	10	Saturday	0809	HybAr		num	8	Saturday	0809	HybAr		num	6	Saturday	0809	HybAr		num	0	Saturday	0809	HybAr
num	0	Saturday	0809	HybTw		num	0	Saturday	0809	HybTw		num	1	Saturday	0809	HybTw		num	0	Saturday	0809	HybTw		num	0	Saturday	0809	HybTw		num	0	Saturday	0809	HybTw		num	0	Saturday	0809	HybTw
num	0	Saturday	0809	PlugTw		num	0	Saturday	0809	PlugTw		num	0	Saturday	0809	PlugTw		num	0	Saturday	0809	PlugTw		num	3	Saturday	0809	PlugTw		num	6	Saturday	0809	PlugTw		num	16	Saturday	0809	PlugTw
num	6	Saturday	0910	ConvBi		num	0	Saturday	0910	ConvBi		num	4	Saturday	0910	ConvBi		num	0	Saturday	0910	ConvBi		num	0	Saturday	0910	ConvBi		num	0	Saturday	0910	ConvBi		num	0	Saturday	0910	ConvBi
num	0	Saturday	0910	HybAr		num	10	Saturday	0910	HybAr		num	3	Saturday	0910	HybAr		num	10	Saturday	0910	HybAr		num	8	Saturday	0910	HybAr		num	6	Saturday	0910	HybAr		num	0	Saturday	0910	HybAr
num	0	Saturday	0910	HybTw		num	0	Saturday	0910	HybTw		num	1	Saturday	0910	HybTw		num	0	Saturday	0910	HybTw		num	0	Saturday	0910	HybTw		num	0	Saturday	0910	HybTw		num	0	Saturday	0910	HybTw
num	0	Saturday	0910	PlugTw		num	0	Saturday	0910	PlugTw		num	0	Saturday	0910	PlugTw		num	0	Saturday	0910	PlugTw		num	3	Saturday	0910	PlugTw		num	6	Saturday	0910	PlugTw		num	16	Saturday	0910	PlugTw
num	6	Saturday	1011	ConvBi		num	0	Saturday	1011	ConvBi		num	4	Saturday	1011	ConvBi		num	0	Saturday	1011	ConvBi		num	0	Saturday	1011	ConvBi		num	0	Saturday	1011	ConvBi		num	0	Saturday	1011	ConvBi
num	0	Saturday	1011	HybAr		num	10	Saturday	1011	HybAr		num	3	Saturday	1011	HybAr		num	10	Saturday	1011	HybAr		num	8	Saturday	1011	HybAr		num	6	Saturday	1011	HybAr		num	0	Saturday	1011	HybAr
num	0	Saturday	1011	HybTw		num	0	Saturday	1011	HybTw		num	1	Saturday	1011	HybTw		num	0	Saturday	1011	HybTw		num	0	Saturday	1011	HybTw		num	0	Saturday	1011	HybTw		num	0	Saturday	1011	HybTw
num	0	Saturday	1011	PlugTw		num	0	Saturday	1011	PlugTw		num	0	Saturday	1011	PlugTw		num	0	Saturday	1011	PlugTw		num	3	Saturday	1011	PlugTw		num	6	Saturday	1011	PlugTw		num	16	Saturday	1011	PlugTw
num	5	Saturday	1112	ConvBi		num	0	Saturday	1112	ConvBi		num	3	Saturday	1112	ConvBi		num	0	Saturday	1112	ConvBi		num	0	Saturday	1112	ConvBi		num	0	Saturday	1112	ConvBi		num	0	Saturday	1112	ConvBi
num	0	Saturday	1112	HybAr		num	7	Saturday	1112	HybAr		num	3	Saturday	1112	HybAr		num	8	Saturday	1112	HybAr		num	5	Saturday	1112	HybAr		num	5	Saturday	1112	HybAr		num	0	Saturday	1112	HybAr
num	0	Saturday	1112	HybTw		num	1	Saturday	1112	HybTw		num	1	Saturday	1112	HybTw		num	1	Saturday	1112	HybTw		num	0	Saturday	1112	HybTw		num	0	Saturday	1112	HybTw		num	0	Saturday	1112	HybTw
num	0	Saturday	1112	PlugTw		num	1	Saturday	1112	PlugTw		num	0	Saturday	1112	PlugTw		num	0	Saturday	1112	PlugTw		num	5	Saturday	1112	PlugTw		num	5	Saturday	1112	PlugTw		num	14	Saturday	1112	PlugTw
num	6	Saturday	1213	ConvBi		num	0	Saturday	1213	ConvBi		num	4	Saturday	1213	ConvBi		num	0	Saturday	1213	ConvBi		num	0	Saturday	1213	ConvBi		num	0	Saturday	1213	ConvBi		num	0	Saturday	1213	ConvBi
num	0	Saturday	1213	HybAr		num	10	Saturday	1213	HybAr		num	3	Saturday	1213	HybAr		num	10	Saturday	1213	HybAr		num	8	Saturday	1213	HybAr		num	6	Saturday	1213	HybAr		num	0	Saturday	1213	HybAr
num	0	Saturday	1213	HybTw		num	0	Saturday	1213	HybTw		num	1	Saturday	1213	HybTw		num	0	Saturday	1213	HybTw		num	0	Saturday	1213	HybTw		num	0	Saturday	1213	HybTw		num	0	Saturday	1213	HybTw
num	0	Saturday	1213	PlugTw		num	0	Saturday	1213	PlugTw		num	0	Saturday	1213	PlugTw		num	0	Saturday	1213	PlugTw		num	3	Saturday	1213	PlugTw		num	6	Saturday	1213	PlugTw		num	16	Saturday	1213	PlugTw
num	5	Saturday	1314	ConvBi		num	0	Saturday	1314	ConvBi		num	3	Saturday	1314	ConvBi		num	0	Saturday	1314	ConvBi		num	0	Saturday	1314	ConvBi		num	0	Saturday	1314	ConvBi		num	0	Saturday	1314	ConvBi
num	0	Saturday	1314	HybAr		num	7	Saturday	1314	HybAr		num	3	Saturday	1314	HybAr		num	8	Saturday	1314	HybAr		num	5	Saturday	1314	HybAr		num	5	Saturday	1314	HybAr		num	0	Saturday	1314	HybAr
num	0	Saturday	1314	HybTw		num	1	Saturday	1314	HybTw		num	1	Saturday	1314	HybTw		num	1	Saturday	1314	HybTw		num	0	Saturday	1314	HybTw		num	0	Saturday	1314	HybTw		num	0	Saturday	1314	HybTw
num	0	Saturday	1314	PlugTw		num	1	Saturday	1314	PlugTw		num	0	Saturday	1314	PlugTw		num	0	Saturday	1314	PlugTw		num	5	Saturday	1314	PlugTw		num	5	Saturday	1314	PlugTw		num	14	Saturday	1314	PlugTw
num	5	Saturday	1415	ConvBi		num	0	Saturday	1415	ConvBi		num	3	Saturday	1415	ConvBi		num	0	Saturday	1415	ConvBi		num	0	Saturday	1415	ConvBi		num	0	Saturday	1415	ConvBi		num	0	Saturday	1415	ConvBi
num	0	Saturday	1415	HybAr		num	7	Saturday	1415	HybAr		num	3	Saturday	1415	HybAr		num	8	Saturday	1415	HybAr		num	5	Saturday	1415	HybAr		num	5	Saturday	1415	HybAr		num	0	Saturday	1415	HybAr
num	0	Saturday	1415	HybTw		num	1	Saturday	1415	HybTw		num	1	Saturday	1415	HybTw		num	1	Saturday	1415	HybTw		num	0	Saturday	1415	HybTw		num	0	Saturday	1415	HybTw		num	0	Saturday	1415	HybTw
num	0	Saturday	1415	PlugTw		num	1	Saturday	1415	PlugTw		num	0	Saturday	1415	PlugTw		num	0	Saturday	1415	PlugTw		num	5	Saturday	1415	PlugTw		num	5	Saturday	1415	PlugTw		num	14	Saturday	1415	PlugTw
num	4	Saturday	1516	ConvBi		num	0	Saturday	1516	ConvBi		num	3	Saturday	1516	ConvBi		num	0	Saturday	1516	ConvBi		num	0	Saturday	1516	ConvBi		num	0	Saturday	1516	ConvBi		num	0	Saturday	1516	ConvBi
num	0	Saturday	1516	HybAr		num	6	Saturday	1516	HybAr		num	0	Saturday	1516	HybAr		num	6	Saturday	1516	HybAr		num	4	Saturday	1516	HybAr		num	4	Saturday	1516	HybAr		num	0	Saturday	1516	HybAr
num	0	Saturday	1516	HybTw		num	1	Saturday	1516	HybTw		num	2	Saturday	1516	HybTw		num	1	Saturday	1516	HybTw		num	0	Saturday	1516	HybTw		num	0	Saturday	1516	HybTw		num	0	Saturday	1516	HybTw
num	0	Saturday	1516	PlugTw		num	0	Saturday	1516	PlugTw		num	1	Saturday	1516	PlugTw		num	0	Saturday	1516	PlugTw		num	4	Saturday	1516	PlugTw		num	4	Saturday	1516	PlugTw		num	11	Saturday	1516	PlugTw
num	5	Saturday	1617	ConvBi		num	0	Saturday	1617	ConvBi		num	3	Saturday	1617	ConvBi		num	0	Saturday	1617	ConvBi		num	0	Saturday	1617	ConvBi		num	0	Saturday	1617	ConvBi		num	0	Saturday	1617	ConvBi
num	0	Saturday	1617	HybAr		num	7	Saturday	1617	HybAr		num	3	Saturday	1617	HybAr		num	8	Saturday	1617	HybAr		num	5	Saturday	1617	HybAr		num	5	Saturday	1617	HybAr		num	0	Saturday	1617	HybAr
num	0	Saturday	1617	HybTw		num	1	Saturday	1617	HybTw		num	1	Saturday	1617	HybTw		num	1	Saturday	1617	HybTw		num	0	Saturday	1617	HybTw		num	0	Saturday	1617	HybTw		num	0	Saturday	1617	HybTw
num	0	Saturday	1617	PlugTw		num	1	Saturday	1617	PlugTw		num	0	Saturday	1617	PlugTw		num	0	Saturday	1617	PlugTw		num	5	Saturday	1617	PlugTw		num	5	Saturday	1617	PlugTw		num	14	Saturday	1617	PlugTw
num	5	Saturday	1718	ConvBi		num	0	Saturday	1718	ConvBi		num	3	Saturday	1718	ConvBi		num	0	Saturday	1718	ConvBi		num	0	Saturday	1718	ConvBi		num	0	Saturday	1718	ConvBi		num	0	Saturday	1718	ConvBi
num	0	Saturday	1718	HybAr		num	7	Saturday	1718	HybAr		num	3	Saturday	1718	HybAr		num	8	Saturday	1718	HybAr		num	5	Saturday	1718	HybAr		num	5	Saturday	1718	HybAr		num	0	Saturday	1718	HybAr
num	0	Saturday	1718	HybTw		num	1	Saturday	1718	HybTw		num	1	Saturday	1718	HybTw		num	1	Saturday	1718	HybTw		num	0	Saturday	1718	HybTw		num	0	Saturday	1718	HybTw		num	0	Saturday	1718	HybTw
num	0	Saturday	1718	PlugTw		num	1	Saturday	1718	PlugTw		num	0	Saturday	1718	PlugTw		num	0	Saturday	1718	PlugTw		num	5	Saturday	1718	PlugTw		num	5	Saturday	1718	PlugTw		num	14	Saturday	1718	PlugTw
num	4	Saturday	1819	ConvBi		num	0	Saturday	1819	ConvBi		num	3	Saturday	1819	ConvBi		num	0	Saturday	1819	ConvBi		num	0	Saturday	1819	ConvBi		num	0	Saturday	1819	ConvBi		num	0	Saturday	1819	ConvBi
num	0	Saturday	1819	HybAr		num	6	Saturday	1819	HybAr		num	0	Saturday	1819	HybAr		num	6	Saturday	1819	HybAr		num	4	Saturday	1819	HybAr		num	4	Saturday	1819	HybAr		num	0	Saturday	1819	HybAr
num	0	Saturday	1819	HybTw		num	1	Saturday	1819	HybTw		num	2	Saturday	1819	HybTw		num	1	Saturday	1819	HybTw		num	0	Saturday	1819	HybTw		num	0	Saturday	1819	HybTw		num	0	Saturday	1819	HybTw
num	0	Saturday	1819	PlugTw		num	0	Saturday	1819	PlugTw		num	1	Saturday	1819	PlugTw		num	0	Saturday	1819	PlugTw		num	4	Saturday	1819	PlugTw		num	4	Saturday	1819	PlugTw		num	11	Saturday	1819	PlugTw
num	5	Saturday	1920	ConvBi		num	0	Saturday	1920	ConvBi		num	3	Saturday	1920	ConvBi		num	0	Saturday	1920	ConvBi		num	0	Saturday	1920	ConvBi		num	0	Saturday	1920	ConvBi		num	0	Saturday	1920	ConvBi
num	0	Saturday	1920	HybAr		num	7	Saturday	1920	HybAr		num	3	Saturday	1920	HybAr		num	8	Saturday	1920	HybAr		num	5	Saturday	1920	HybAr		num	5	Saturday	1920	HybAr		num	0	Saturday	1920	HybAr
num	0	Saturday	1920	HybTw		num	1	Saturday	1920	HybTw		num	1	Saturday	1920	HybTw		num	1	Saturday	1920	HybTw		num	0	Saturday	1920	HybTw		num	0	Saturday	1920	HybTw		num	0	Saturday	1920	HybTw
num	0	Saturday	1920	PlugTw		num	1	Saturday	1920	PlugTw		num	0	Saturday	1920	PlugTw		num	0	Saturday	1920	PlugTw		num	5	Saturday	1920	PlugTw		num	5	Saturday	1920	PlugTw		num	14	Saturday	1920	PlugTw
num	5	Saturday	2021	ConvBi		num	0	Saturday	2021	ConvBi		num	3	Saturday	2021	ConvBi		num	0	Saturday	2021	ConvBi		num	0	Saturday	2021	ConvBi		num	0	Saturday	2021	ConvBi		num	0	Saturday	2021	ConvBi
num	0	Saturday	2021	HybAr		num	7	Saturday	2021	HybAr		num	3	Saturday	2021	HybAr		num	8	Saturday	2021	HybAr		num	5	Saturday	2021	HybAr		num	5	Saturday	2021	HybAr		num	0	Saturday	2021	HybAr
num	0	Saturday	2021	HybTw		num	1	Saturday	2021	HybTw		num	1	Saturday	2021	HybTw		num	1	Saturday	2021	HybTw		num	0	Saturday	2021	HybTw		num	0	Saturday	2021	HybTw		num	0	Saturday	2021	HybTw
num	0	Saturday	2021	PlugTw		num	1	Saturday	2021	PlugTw		num	0	Saturday	2021	PlugTw		num	0	Saturday	2021	PlugTw		num	5	Saturday	2021	PlugTw		num	5	Saturday	2021	PlugTw		num	14	Saturday	2021	PlugTw
num	4	Saturday	2122	ConvBi		num	0	Saturday	2122	ConvBi		num	3	Saturday	2122	ConvBi		num	0	Saturday	2122	ConvBi		num	0	Saturday	2122	ConvBi		num	0	Saturday	2122	ConvBi		num	0	Saturday	2122	ConvBi
num	0	Saturday	2122	HybAr		num	6	Saturday	2122	HybAr		num	0	Saturday	2122	HybAr		num	6	Saturday	2122	HybAr		num	4	Saturday	2122	HybAr		num	4	Saturday	2122	HybAr		num	0	Saturday	2122	HybAr
num	0	Saturday	2122	HybTw		num	1	Saturday	2122	HybTw		num	2	Saturday	2122	HybTw		num	1	Saturday	2122	HybTw		num	0	Saturday	2122	HybTw		num	0	Saturday	2122	HybTw		num	0	Saturday	2122	HybTw
num	0	Saturday	2122	PlugTw		num	0	Saturday	2122	PlugTw		num	1	Saturday	2122	PlugTw		num	0	Saturday	2122	PlugTw		num	4	Saturday	2122	PlugTw		num	4	Saturday	2122	PlugTw		num	11	Saturday	2122	PlugTw
num	5	Saturday	2223	ConvBi		num	0	Saturday	2223	ConvBi		num	3	Saturday	2223	ConvBi		num	0	Saturday	2223	ConvBi		num	0	Saturday	2223	ConvBi		num	0	Saturday	2223	ConvBi		num	0	Saturday	2223	ConvBi
num	0	Saturday	2223	HybAr		num	7	Saturday	2223	HybAr		num	3	Saturday	2223	HybAr		num	8	Saturday	2223	HybAr		num	5	Saturday	2223	HybAr		num	5	Saturday	2223	HybAr		num	0	Saturday	2223	HybAr
num	0	Saturday	2223	HybTw		num	1	Saturday	2223	HybTw		num	1	Saturday	2223	HybTw		num	1	Saturday	2223	HybTw		num	0	Saturday	2223	HybTw		num	0	Saturday	2223	HybTw		num	0	Saturday	2223	HybTw
num	0	Saturday	2223	PlugTw		num	1	Saturday	2223	PlugTw		num	0	Saturday	2223	PlugTw		num	0	Saturday	2223	PlugTw		num	5	Saturday	2223	PlugTw		num	5	Saturday	2223	PlugTw		num	14	Saturday	2223	PlugTw
num	4	Saturday	2324	ConvBi		num	0	Saturday	2324	ConvBi		num	3	Saturday	2324	ConvBi		num	0	Saturday	2324	ConvBi		num	0	Saturday	2324	ConvBi		num	0	Saturday	2324	ConvBi		num	0	Saturday	2324	ConvBi
num	0	Saturday	2324	HybAr		num	6	Saturday	2324	HybAr		num	0	Saturday	2324	HybAr		num	6	Saturday	2324	HybAr		num	4	Saturday	2324	HybAr		num	4	Saturday	2324	HybAr		num	0	Saturday	2324	HybAr
num	0	Saturday	2324	HybTw		num	1	Saturday	2324	HybTw		num	2	Saturday	2324	HybTw		num	1	Saturday	2324	HybTw		num	0	Saturday	2324	HybTw		num	0	Saturday	2324	HybTw		num	0	Saturday	2324	HybTw
num	0	Saturday	2324	PlugTw		num	0	Saturday	2324	PlugTw		num	1	Saturday	2324	PlugTw		num	0	Saturday	2324	PlugTw		num	4	Saturday	2324	PlugTw		num	4	Saturday	2324	PlugTw		num	11	Saturday	2324	PlugTw
num	1	Sunday	0506	ConvBi		num	0	Sunday	0506	ConvBi		num	1	Sunday	0506	ConvBi		num	0	Sunday	0506	ConvBi		num	0	Sunday	0506	ConvBi		num	0	Sunday	0506	ConvBi		num	0	Sunday	0506	ConvBi
num	0	Sunday	0506	HybAr		num	1	Sunday	0506	HybAr		num	0	Sunday	0506	HybAr		num	2	Sunday	0506	HybAr		num	1	Sunday	0506	HybAr		num	1	Sunday	0506	HybAr		num	0	Sunday	0506	HybAr
num	0	Sunday	0506	HybTw		num	0	Sunday	0506	HybTw		num	1	Sunday	0506	HybTw		num	0	Sunday	0506	HybTw		num	0	Sunday	0506	HybTw		num	0	Sunday	0506	HybTw		num	0	Sunday	0506	HybTw
num	0	Sunday	0506	PlugTw		num	1	Sunday	0506	PlugTw		num	0	Sunday	0506	PlugTw		num	0	Sunday	0506	PlugTw		num	1	Sunday	0506	PlugTw		num	1	Sunday	0506	PlugTw		num	3	Sunday	0506	PlugTw
num	5	Sunday	0607	ConvBi		num	0	Sunday	0607	ConvBi		num	3	Sunday	0607	ConvBi		num	0	Sunday	0607	ConvBi		num	0	Sunday	0607	ConvBi		num	0	Sunday	0607	ConvBi		num	0	Sunday	0607	ConvBi
num	0	Sunday	0607	HybAr		num	7	Sunday	0607	HybAr		num	3	Sunday	0607	HybAr		num	8	Sunday	0607	HybAr		num	5	Sunday	0607	HybAr		num	5	Sunday	0607	HybAr		num	0	Sunday	0607	HybAr
num	0	Sunday	0607	HybTw		num	1	Sunday	0607	HybTw		num	1	Sunday	0607	HybTw		num	1	Sunday	0607	HybTw		num	0	Sunday	0607	HybTw		num	0	Sunday	0607	HybTw		num	0	Sunday	0607	HybTw
num	0	Sunday	0607	PlugTw		num	1	Sunday	0607	PlugTw		num	0	Sunday	0607	PlugTw		num	0	Sunday	0607	PlugTw		num	5	Sunday	0607	PlugTw		num	5	Sunday	0607	PlugTw		num	14	Sunday	0607	PlugTw
num	5	Sunday	0708	ConvBi		num	0	Sunday	0708	ConvBi		num	3	Sunday	0708	ConvBi		num	0	Sunday	0708	ConvBi		num	0	Sunday	0708	ConvBi		num	0	Sunday	0708	ConvBi		num	0	Sunday	0708	ConvBi
num	0	Sunday	0708	HybAr		num	7	Sunday	0708	HybAr		num	3	Sunday	0708	HybAr		num	8	Sunday	0708	HybAr		num	5	Sunday	0708	HybAr		num	5	Sunday	0708	HybAr		num	0	Sunday	0708	HybAr
num	0	Sunday	0708	HybTw		num	1	Sunday	0708	HybTw		num	1	Sunday	0708	HybTw		num	1	Sunday	0708	HybTw		num	0	Sunday	0708	HybTw		num	0	Sunday	0708	HybTw		num	0	Sunday	0708	HybTw
num	0	Sunday	0708	PlugTw		num	1	Sunday	0708	PlugTw		num	0	Sunday	0708	PlugTw		num	0	Sunday	0708	PlugTw		num	5	Sunday	0708	PlugTw		num	5	Sunday	0708	PlugTw		num	14	Sunday	0708	PlugTw
num	4	Sunday	0809	ConvBi		num	0	Sunday	0809	ConvBi		num	3	Sunday	0809	ConvBi		num	0	Sunday	0809	ConvBi		num	0	Sunday	0809	ConvBi		num	0	Sunday	0809	ConvBi		num	0	Sunday	0809	ConvBi
num	0	Sunday	0809	HybAr		num	6	Sunday	0809	HybAr		num	0	Sunday	0809	HybAr		num	6	Sunday	0809	HybAr		num	4	Sunday	0809	HybAr		num	4	Sunday	0809	HybAr		num	0	Sunday	0809	HybAr
num	0	Sunday	0809	HybTw		num	1	Sunday	0809	HybTw		num	2	Sunday	0809	HybTw		num	1	Sunday	0809	HybTw		num	0	Sunday	0809	HybTw		num	0	Sunday	0809	HybTw		num	0	Sunday	0809	HybTw
num	0	Sunday	0809	PlugTw		num	0	Sunday	0809	PlugTw		num	1	Sunday	0809	PlugTw		num	0	Sunday	0809	PlugTw		num	4	Sunday	0809	PlugTw		num	4	Sunday	0809	PlugTw		num	11	Sunday	0809	PlugTw
num	5	Sunday	0910	ConvBi		num	0	Sunday	0910	ConvBi		num	3	Sunday	0910	ConvBi		num	0	Sunday	0910	ConvBi		num	0	Sunday	0910	ConvBi		num	0	Sunday	0910	ConvBi		num	0	Sunday	0910	ConvBi
num	0	Sunday	0910	HybAr		num	7	Sunday	0910	HybAr		num	3	Sunday	0910	HybAr		num	8	Sunday	0910	HybAr		num	5	Sunday	0910	HybAr		num	5	Sunday	0910	HybAr		num	0	Sunday	0910	HybAr
num	0	Sunday	0910	HybTw		num	1	Sunday	0910	HybTw		num	1	Sunday	0910	HybTw		num	1	Sunday	0910	HybTw		num	0	Sunday	0910	HybTw		num	0	Sunday	0910	HybTw		num	0	Sunday	0910	HybTw
num	0	Sunday	0910	PlugTw		num	1	Sunday	0910	PlugTw		num	0	Sunday	0910	PlugTw		num	0	Sunday	0910	PlugTw		num	5	Sunday	0910	PlugTw		num	5	Sunday	0910	PlugTw		num	14	Sunday	0910	PlugTw
num	4	Sunday	1011	ConvBi		num	0	Sunday	1011	ConvBi		num	3	Sunday	1011	ConvBi		num	0	Sunday	1011	ConvBi		num	0	Sunday	1011	ConvBi		num	0	Sunday	1011	ConvBi		num	0	Sunday	1011	ConvBi
num	0	Sunday	1011	HybAr		num	6	Sunday	1011	HybAr		num	0	Sunday	1011	HybAr		num	6	Sunday	1011	HybAr		num	4	Sunday	1011	HybAr		num	4	Sunday	1011	HybAr		num	0	Sunday	1011	HybAr
num	0	Sunday	1011	HybTw		num	1	Sunday	1011	HybTw		num	2	Sunday	1011	HybTw		num	1	Sunday	1011	HybTw		num	0	Sunday	1011	HybTw		num	0	Sunday	1011	HybTw		num	0	Sunday	1011	HybTw
num	0	Sunday	1011	PlugTw		num	0	Sunday	1011	PlugTw		num	1	Sunday	1011	PlugTw		num	0	Sunday	1011	PlugTw		num	4	Sunday	1011	PlugTw		num	4	Sunday	1011	PlugTw		num	11	Sunday	1011	PlugTw
num	5	Sunday	1112	ConvBi		num	0	Sunday	1112	ConvBi		num	3	Sunday	1112	ConvBi		num	0	Sunday	1112	ConvBi		num	0	Sunday	1112	ConvBi		num	0	Sunday	1112	ConvBi		num	0	Sunday	1112	ConvBi
num	0	Sunday	1112	HybAr		num	7	Sunday	1112	HybAr		num	3	Sunday	1112	HybAr		num	8	Sunday	1112	HybAr		num	5	Sunday	1112	HybAr		num	5	Sunday	1112	HybAr		num	0	Sunday	1112	HybAr
num	0	Sunday	1112	HybTw		num	1	Sunday	1112	HybTw		num	1	Sunday	1112	HybTw		num	1	Sunday	1112	HybTw		num	0	Sunday	1112	HybTw		num	0	Sunday	1112	HybTw		num	0	Sunday	1112	HybTw
num	0	Sunday	1112	PlugTw		num	1	Sunday	1112	PlugTw		num	0	Sunday	1112	PlugTw		num	0	Sunday	1112	PlugTw		num	5	Sunday	1112	PlugTw		num	5	Sunday	1112	PlugTw		num	14	Sunday	1112	PlugTw
num	5	Sunday	1213	ConvBi		num	0	Sunday	1213	ConvBi		num	3	Sunday	1213	ConvBi		num	0	Sunday	1213	ConvBi		num	0	Sunday	1213	ConvBi		num	0	Sunday	1213	ConvBi		num	0	Sunday	1213	ConvBi
num	0	Sunday	1213	HybAr		num	7	Sunday	1213	HybAr		num	3	Sunday	1213	HybAr		num	8	Sunday	1213	HybAr		num	5	Sunday	1213	HybAr		num	5	Sunday	1213	HybAr		num	0	Sunday	1213	HybAr
num	0	Sunday	1213	HybTw		num	1	Sunday	1213	HybTw		num	1	Sunday	1213	HybTw		num	1	Sunday	1213	HybTw		num	0	Sunday	1213	HybTw		num	0	Sunday	1213	HybTw		num	0	Sunday	1213	HybTw
num	0	Sunday	1213	PlugTw		num	1	Sunday	1213	PlugTw		num	0	Sunday	1213	PlugTw		num	0	Sunday	1213	PlugTw		num	5	Sunday	1213	PlugTw		num	5	Sunday	1213	PlugTw		num	14	Sunday	1213	PlugTw
num	4	Sunday	1314	ConvBi		num	0	Sunday	1314	ConvBi		num	3	Sunday	1314	ConvBi		num	0	Sunday	1314	ConvBi		num	0	Sunday	1314	ConvBi		num	0	Sunday	1314	ConvBi		num	0	Sunday	1314	ConvBi
num	0	Sunday	1314	HybAr		num	6	Sunday	1314	HybAr		num	0	Sunday	1314	HybAr		num	6	Sunday	1314	HybAr		num	4	Sunday	1314	HybAr		num	4	Sunday	1314	HybAr		num	0	Sunday	1314	HybAr
num	0	Sunday	1314	HybTw		num	1	Sunday	1314	HybTw		num	2	Sunday	1314	HybTw		num	1	Sunday	1314	HybTw		num	0	Sunday	1314	HybTw		num	0	Sunday	1314	HybTw		num	0	Sunday	1314	HybTw
num	0	Sunday	1314	PlugTw		num	0	Sunday	1314	PlugTw		num	1	Sunday	1314	PlugTw		num	0	Sunday	1314	PlugTw		num	4	Sunday	1314	PlugTw		num	4	Sunday	1314	PlugTw		num	11	Sunday	1314	PlugTw
num	5	Sunday	1415	ConvBi		num	0	Sunday	1415	ConvBi		num	3	Sunday	1415	ConvBi		num	0	Sunday	1415	ConvBi		num	0	Sunday	1415	ConvBi		num	0	Sunday	1415	ConvBi		num	0	Sunday	1415	ConvBi
num	0	Sunday	1415	HybAr		num	7	Sunday	1415	HybAr		num	3	Sunday	1415	HybAr		num	8	Sunday	1415	HybAr		num	5	Sunday	1415	HybAr		num	5	Sunday	1415	HybAr		num	0	Sunday	1415	HybAr
num	0	Sunday	1415	HybTw		num	1	Sunday	1415	HybTw		num	1	Sunday	1415	HybTw		num	1	Sunday	1415	HybTw		num	0	Sunday	1415	HybTw		num	0	Sunday	1415	HybTw		num	0	Sunday	1415	HybTw
num	0	Sunday	1415	PlugTw		num	1	Sunday	1415	PlugTw		num	0	Sunday	1415	PlugTw		num	0	Sunday	1415	PlugTw		num	5	Sunday	1415	PlugTw		num	5	Sunday	1415	PlugTw		num	14	Sunday	1415	PlugTw
num	5	Sunday	1516	ConvBi		num	0	Sunday	1516	ConvBi		num	3	Sunday	1516	ConvBi		num	0	Sunday	1516	ConvBi		num	0	Sunday	1516	ConvBi		num	0	Sunday	1516	ConvBi		num	0	Sunday	1516	ConvBi
num	0	Sunday	1516	HybAr		num	7	Sunday	1516	HybAr		num	3	Sunday	1516	HybAr		num	8	Sunday	1516	HybAr		num	5	Sunday	1516	HybAr		num	5	Sunday	1516	HybAr		num	0	Sunday	1516	HybAr
num	0	Sunday	1516	HybTw		num	1	Sunday	1516	HybTw		num	1	Sunday	1516	HybTw		num	1	Sunday	1516	HybTw		num	0	Sunday	1516	HybTw		num	0	Sunday	1516	HybTw		num	0	Sunday	1516	HybTw
num	0	Sunday	1516	PlugTw		num	1	Sunday	1516	PlugTw		num	0	Sunday	1516	PlugTw		num	0	Sunday	1516	PlugTw		num	5	Sunday	1516	PlugTw		num	5	Sunday	1516	PlugTw		num	14	Sunday	1516	PlugTw
num	4	Sunday	1617	ConvBi		num	0	Sunday	1617	ConvBi		num	3	Sunday	1617	ConvBi		num	0	Sunday	1617	ConvBi		num	0	Sunday	1617	ConvBi		num	0	Sunday	1617	ConvBi		num	0	Sunday	1617	ConvBi
num	0	Sunday	1617	HybAr		num	6	Sunday	1617	HybAr		num	0	Sunday	1617	HybAr		num	6	Sunday	1617	HybAr		num	4	Sunday	1617	HybAr		num	4	Sunday	1617	HybAr		num	0	Sunday	1617	HybAr
num	0	Sunday	1617	HybTw		num	1	Sunday	1617	HybTw		num	2	Sunday	1617	HybTw		num	1	Sunday	1617	HybTw		num	0	Sunday	1617	HybTw		num	0	Sunday	1617	HybTw		num	0	Sunday	1617	HybTw
num	0	Sunday	1617	PlugTw		num	0	Sunday	1617	PlugTw		num	1	Sunday	1617	PlugTw		num	0	Sunday	1617	PlugTw		num	4	Sunday	1617	PlugTw		num	4	Sunday	1617	PlugTw		num	11	Sunday	1617	PlugTw
num	5	Sunday	1718	ConvBi		num	0	Sunday	1718	ConvBi		num	3	Sunday	1718	ConvBi		num	0	Sunday	1718	ConvBi		num	0	Sunday	1718	ConvBi		num	0	Sunday	1718	ConvBi		num	0	Sunday	1718	ConvBi
num	0	Sunday	1718	HybAr		num	7	Sunday	1718	HybAr		num	3	Sunday	1718	HybAr		num	8	Sunday	1718	HybAr		num	5	Sunday	1718	HybAr		num	5	Sunday	1718	HybAr		num	0	Sunday	1718	HybAr
num	0	Sunday	1718	HybTw		num	1	Sunday	1718	HybTw		num	1	Sunday	1718	HybTw		num	1	Sunday	1718	HybTw		num	0	Sunday	1718	HybTw		num	0	Sunday	1718	HybTw		num	0	Sunday	1718	HybTw
num	0	Sunday	1718	PlugTw		num	1	Sunday	1718	PlugTw		num	0	Sunday	1718	PlugTw		num	0	Sunday	1718	PlugTw		num	5	Sunday	1718	PlugTw		num	5	Sunday	1718	PlugTw		num	14	Sunday	1718	PlugTw
num	4	Sunday	1819	ConvBi		num	0	Sunday	1819	ConvBi		num	3	Sunday	1819	ConvBi		num	0	Sunday	1819	ConvBi		num	0	Sunday	1819	ConvBi		num	0	Sunday	1819	ConvBi		num	0	Sunday	1819	ConvBi
num	0	Sunday	1819	HybAr		num	6	Sunday	1819	HybAr		num	0	Sunday	1819	HybAr		num	6	Sunday	1819	HybAr		num	4	Sunday	1819	HybAr		num	4	Sunday	1819	HybAr		num	0	Sunday	1819	HybAr
num	0	Sunday	1819	HybTw		num	1	Sunday	1819	HybTw		num	2	Sunday	1819	HybTw		num	1	Sunday	1819	HybTw		num	0	Sunday	1819	HybTw		num	0	Sunday	1819	HybTw		num	0	Sunday	1819	HybTw
num	0	Sunday	1819	PlugTw		num	0	Sunday	1819	PlugTw		num	1	Sunday	1819	PlugTw		num	0	Sunday	1819	PlugTw		num	4	Sunday	1819	PlugTw		num	4	Sunday	1819	PlugTw		num	11	Sunday	1819	PlugTw
num	5	Sunday	1920	ConvBi		num	0	Sunday	1920	ConvBi		num	3	Sunday	1920	ConvBi		num	0	Sunday	1920	ConvBi		num	0	Sunday	1920	ConvBi		num	0	Sunday	1920	ConvBi		num	0	Sunday	1920	ConvBi
num	0	Sunday	1920	HybAr		num	7	Sunday	1920	HybAr		num	3	Sunday	1920	HybAr		num	8	Sunday	1920	HybAr		num	5	Sunday	1920	HybAr		num	5	Sunday	1920	HybAr		num	0	Sunday	1920	HybAr
num	0	Sunday	1920	HybTw		num	1	Sunday	1920	HybTw		num	1	Sunday	1920	HybTw		num	1	Sunday	1920	HybTw		num	0	Sunday	1920	HybTw		num	0	Sunday	1920	HybTw		num	0	Sunday	1920	HybTw
num	0	Sunday	1920	PlugTw		num	1	Sunday	1920	PlugTw		num	0	Sunday	1920	PlugTw		num	0	Sunday	1920	PlugTw		num	5	Sunday	1920	PlugTw		num	5	Sunday	1920	PlugTw		num	14	Sunday	1920	PlugTw
num	5	Sunday	2021	ConvBi		num	0	Sunday	2021	ConvBi		num	3	Sunday	2021	ConvBi		num	0	Sunday	2021	ConvBi		num	0	Sunday	2021	ConvBi		num	0	Sunday	2021	ConvBi		num	0	Sunday	2021	ConvBi
num	0	Sunday	2021	HybAr		num	7	Sunday	2021	HybAr		num	3	Sunday	2021	HybAr		num	8	Sunday	2021	HybAr		num	5	Sunday	2021	HybAr		num	5	Sunday	2021	HybAr		num	0	Sunday	2021	HybAr
num	0	Sunday	2021	HybTw		num	1	Sunday	2021	HybTw		num	1	Sunday	2021	HybTw		num	1	Sunday	2021	HybTw		num	0	Sunday	2021	HybTw		num	0	Sunday	2021	HybTw		num	0	Sunday	2021	HybTw
num	0	Sunday	2021	PlugTw		num	1	Sunday	2021	PlugTw		num	0	Sunday	2021	PlugTw		num	0	Sunday	2021	PlugTw		num	5	Sunday	2021	PlugTw		num	5	Sunday	2021	PlugTw		num	14	Sunday	2021	PlugTw
num	4	Sunday	2122	ConvBi		num	0	Sunday	2122	ConvBi		num	3	Sunday	2122	ConvBi		num	0	Sunday	2122	ConvBi		num	0	Sunday	2122	ConvBi		num	0	Sunday	2122	ConvBi		num	0	Sunday	2122	ConvBi
num	0	Sunday	2122	HybAr		num	6	Sunday	2122	HybAr		num	0	Sunday	2122	HybAr		num	6	Sunday	2122	HybAr		num	4	Sunday	2122	HybAr		num	4	Sunday	2122	HybAr		num	0	Sunday	2122	HybAr
num	0	Sunday	2122	HybTw		num	1	Sunday	2122	HybTw		num	2	Sunday	2122	HybTw		num	1	Sunday	2122	HybTw		num	0	Sunday	2122	HybTw		num	0	Sunday	2122	HybTw		num	0	Sunday	2122	HybTw
num	0	Sunday	2122	PlugTw		num	0	Sunday	2122	PlugTw		num	1	Sunday	2122	PlugTw		num	0	Sunday	2122	PlugTw		num	4	Sunday	2122	PlugTw		num	4	Sunday	2122	PlugTw		num	11	Sunday	2122	PlugTw
num	5	Sunday	2223	ConvBi		num	0	Sunday	2223	ConvBi		num	3	Sunday	2223	ConvBi		num	0	Sunday	2223	ConvBi		num	0	Sunday	2223	ConvBi		num	0	Sunday	2223	ConvBi		num	0	Sunday	2223	ConvBi
num	0	Sunday	2223	HybAr		num	7	Sunday	2223	HybAr		num	3	Sunday	2223	HybAr		num	8	Sunday	2223	HybAr		num	5	Sunday	2223	HybAr		num	5	Sunday	2223	HybAr		num	0	Sunday	2223	HybAr
num	0	Sunday	2223	HybTw		num	1	Sunday	2223	HybTw		num	1	Sunday	2223	HybTw		num	1	Sunday	2223	HybTw		num	0	Sunday	2223	HybTw		num	0	Sunday	2223	HybTw		num	0	Sunday	2223	HybTw
num	0	Sunday	2223	PlugTw		num	1	Sunday	2223	PlugTw		num	0	Sunday	2223	PlugTw		num	0	Sunday	2223	PlugTw		num	5	Sunday	2223	PlugTw		num	5	Sunday	2223	PlugTw		num	14	Sunday	2223	PlugTw
num	4	Sunday	2324	ConvBi		num	0	Sunday	2324	ConvBi		num	3	Sunday	2324	ConvBi		num	0	Sunday	2324	ConvBi		num	0	Sunday	2324	ConvBi		num	0	Sunday	2324	ConvBi		num	0	Sunday	2324	ConvBi
num	0	Sunday	2324	HybAr		num	6	Sunday	2324	HybAr		num	0	Sunday	2324	HybAr		num	6	Sunday	2324	HybAr		num	4	Sunday	2324	HybAr		num	4	Sunday	2324	HybAr		num	0	Sunday	2324	HybAr
num	0	Sunday	2324	HybTw		num	1	Sunday	2324	HybTw		num	2	Sunday	2324	HybTw		num	1	Sunday	2324	HybTw		num	0	Sunday	2324	HybTw		num	0	Sunday	2324	HybTw		num	0	Sunday	2324	HybTw
num	0	Sunday	2324	PlugTw		num	0	Sunday	2324	PlugTw		num	1	Sunday	2324	PlugTw		num	0	Sunday	2324	PlugTw		num	4	Sunday	2324	PlugTw		num	4	Sunday	2324	PlugTw		num	11	Sunday	2324	PlugTw
num	3	Thursday	0506	ConvBi		num	0	Thursday	0506	ConvBi		num	2	Thursday	0506	ConvBi		num	0	Thursday	0506	ConvBi		num	0	Thursday	0506	ConvBi		num	0	Thursday	0506	ConvBi		num	0	Thursday	0506	ConvBi
num	0	Thursday	0506	HybAr		num	5	Thursday	0506	HybAr		num	1	Thursday	0506	HybAr		num	5	Thursday	0506	HybAr		num	3	Thursday	0506	HybAr		num	3	Thursday	0506	HybAr		num	0	Thursday	0506	HybAr
num	0	Thursday	0506	HybTw		num	0	Thursday	0506	HybTw		num	0	Thursday	0506	HybTw		num	0	Thursday	0506	HybTw		num	0	Thursday	0506	HybTw		num	0	Thursday	0506	HybTw		num	0	Thursday	0506	HybTw
num	0	Thursday	0506	PlugTw		num	0	Thursday	0506	PlugTw		num	1	Thursday	0506	PlugTw		num	0	Thursday	0506	PlugTw		num	3	Thursday	0506	PlugTw		num	3	Thursday	0506	PlugTw		num	8	Thursday	0506	PlugTw
num	5	Thursday	0607	ConvBi		num	0	Thursday	0607	ConvBi		num	3	Thursday	0607	ConvBi		num	0	Thursday	0607	ConvBi		num	0	Thursday	0607	ConvBi		num	0	Thursday	0607	ConvBi		num	0	Thursday	0607	ConvBi
num	0	Thursday	0607	HybAr		num	7	Thursday	0607	HybAr		num	3	Thursday	0607	HybAr		num	8	Thursday	0607	HybAr		num	5	Thursday	0607	HybAr		num	5	Thursday	0607	HybAr		num	0	Thursday	0607	HybAr
num	0	Thursday	0607	HybTw		num	1	Thursday	0607	HybTw		num	1	Thursday	0607	HybTw		num	1	Thursday	0607	HybTw		num	0	Thursday	0607	HybTw		num	0	Thursday	0607	HybTw		num	0	Thursday	0607	HybTw
num	0	Thursday	0607	PlugTw		num	1	Thursday	0607	PlugTw		num	0	Thursday	0607	PlugTw		num	0	Thursday	0607	PlugTw		num	5	Thursday	0607	PlugTw		num	5	Thursday	0607	PlugTw		num	14	Thursday	0607	PlugTw
num	8	Thursday	0708	ConvBi		num	0	Thursday	0708	ConvBi		num	5	Thursday	0708	ConvBi		num	0	Thursday	0708	ConvBi		num	0	Thursday	0708	ConvBi		num	0	Thursday	0708	ConvBi		num	0	Thursday	0708	ConvBi
num	0	Thursday	0708	HybAr		num	13	Thursday	0708	HybAr		num	5	Thursday	0708	HybAr		num	13	Thursday	0708	HybAr		num	10	Thursday	0708	HybAr		num	8	Thursday	0708	HybAr		num	0	Thursday	0708	HybAr
num	0	Thursday	0708	HybTw		num	0	Thursday	0708	HybTw		num	0	Thursday	0708	HybTw		num	0	Thursday	0708	HybTw		num	0	Thursday	0708	HybTw		num	0	Thursday	0708	HybTw		num	0	Thursday	0708	HybTw
num	0	Thursday	0708	PlugTw		num	0	Thursday	0708	PlugTw		num	0	Thursday	0708	PlugTw		num	0	Thursday	0708	PlugTw		num	5	Thursday	0708	PlugTw		num	8	Thursday	0708	PlugTw		num	21	Thursday	0708	PlugTw
num	5	Thursday	0809	ConvBi		num	0	Thursday	0809	ConvBi		num	3	Thursday	0809	ConvBi		num	0	Thursday	0809	ConvBi		num	0	Thursday	0809	ConvBi		num	0	Thursday	0809	ConvBi		num	0	Thursday	0809	ConvBi
num	0	Thursday	0809	HybAr		num	7	Thursday	0809	HybAr		num	3	Thursday	0809	HybAr		num	8	Thursday	0809	HybAr		num	5	Thursday	0809	HybAr		num	5	Thursday	0809	HybAr		num	0	Thursday	0809	HybAr
num	0	Thursday	0809	HybTw		num	1	Thursday	0809	HybTw		num	1	Thursday	0809	HybTw		num	1	Thursday	0809	HybTw		num	0	Thursday	0809	HybTw		num	0	Thursday	0809	HybTw		num	0	Thursday	0809	HybTw
num	0	Thursday	0809	PlugTw		num	1	Thursday	0809	PlugTw		num	0	Thursday	0809	PlugTw		num	0	Thursday	0809	PlugTw		num	5	Thursday	0809	PlugTw		num	5	Thursday	0809	PlugTw		num	14	Thursday	0809	PlugTw
num	6	Thursday	0910	ConvBi		num	0	Thursday	0910	ConvBi		num	4	Thursday	0910	ConvBi		num	0	Thursday	0910	ConvBi		num	0	Thursday	0910	ConvBi		num	0	Thursday	0910	ConvBi		num	0	Thursday	0910	ConvBi
num	0	Thursday	0910	HybAr		num	10	Thursday	0910	HybAr		num	3	Thursday	0910	HybAr		num	10	Thursday	0910	HybAr		num	8	Thursday	0910	HybAr		num	6	Thursday	0910	HybAr		num	0	Thursday	0910	HybAr
num	0	Thursday	0910	HybTw		num	0	Thursday	0910	HybTw		num	1	Thursday	0910	HybTw		num	0	Thursday	0910	HybTw		num	0	Thursday	0910	HybTw		num	0	Thursday	0910	HybTw		num	0	Thursday	0910	HybTw
num	0	Thursday	0910	PlugTw		num	0	Thursday	0910	PlugTw		num	0	Thursday	0910	PlugTw		num	0	Thursday	0910	PlugTw		num	3	Thursday	0910	PlugTw		num	6	Thursday	0910	PlugTw		num	16	Thursday	0910	PlugTw
num	5	Thursday	1011	ConvBi		num	0	Thursday	1011	ConvBi		num	3	Thursday	1011	ConvBi		num	0	Thursday	1011	ConvBi		num	0	Thursday	1011	ConvBi		num	0	Thursday	1011	ConvBi		num	0	Thursday	1011	ConvBi
num	0	Thursday	1011	HybAr		num	7	Thursday	1011	HybAr		num	3	Thursday	1011	HybAr		num	8	Thursday	1011	HybAr		num	5	Thursday	1011	HybAr		num	5	Thursday	1011	HybAr		num	0	Thursday	1011	HybAr
num	0	Thursday	1011	HybTw		num	1	Thursday	1011	HybTw		num	1	Thursday	1011	HybTw		num	1	Thursday	1011	HybTw		num	0	Thursday	1011	HybTw		num	0	Thursday	1011	HybTw		num	0	Thursday	1011	HybTw
num	0	Thursday	1011	PlugTw		num	1	Thursday	1011	PlugTw		num	0	Thursday	1011	PlugTw		num	0	Thursday	1011	PlugTw		num	5	Thursday	1011	PlugTw		num	5	Thursday	1011	PlugTw		num	14	Thursday	1011	PlugTw
num	6	Thursday	1112	ConvBi		num	0	Thursday	1112	ConvBi		num	4	Thursday	1112	ConvBi		num	0	Thursday	1112	ConvBi		num	0	Thursday	1112	ConvBi		num	0	Thursday	1112	ConvBi		num	0	Thursday	1112	ConvBi
num	0	Thursday	1112	HybAr		num	10	Thursday	1112	HybAr		num	3	Thursday	1112	HybAr		num	10	Thursday	1112	HybAr		num	8	Thursday	1112	HybAr		num	6	Thursday	1112	HybAr		num	0	Thursday	1112	HybAr
num	0	Thursday	1112	HybTw		num	0	Thursday	1112	HybTw		num	1	Thursday	1112	HybTw		num	0	Thursday	1112	HybTw		num	0	Thursday	1112	HybTw		num	0	Thursday	1112	HybTw		num	0	Thursday	1112	HybTw
num	0	Thursday	1112	PlugTw		num	0	Thursday	1112	PlugTw		num	0	Thursday	1112	PlugTw		num	0	Thursday	1112	PlugTw		num	3	Thursday	1112	PlugTw		num	6	Thursday	1112	PlugTw		num	16	Thursday	1112	PlugTw
num	5	Thursday	1213	ConvBi		num	0	Thursday	1213	ConvBi		num	3	Thursday	1213	ConvBi		num	0	Thursday	1213	ConvBi		num	0	Thursday	1213	ConvBi		num	0	Thursday	1213	ConvBi		num	0	Thursday	1213	ConvBi
num	0	Thursday	1213	HybAr		num	7	Thursday	1213	HybAr		num	3	Thursday	1213	HybAr		num	8	Thursday	1213	HybAr		num	5	Thursday	1213	HybAr		num	5	Thursday	1213	HybAr		num	0	Thursday	1213	HybAr
num	0	Thursday	1213	HybTw		num	1	Thursday	1213	HybTw		num	1	Thursday	1213	HybTw		num	1	Thursday	1213	HybTw		num	0	Thursday	1213	HybTw		num	0	Thursday	1213	HybTw		num	0	Thursday	1213	HybTw
num	0	Thursday	1213	PlugTw		num	1	Thursday	1213	PlugTw		num	0	Thursday	1213	PlugTw		num	0	Thursday	1213	PlugTw		num	5	Thursday	1213	PlugTw		num	5	Thursday	1213	PlugTw		num	14	Thursday	1213	PlugTw
num	5	Thursday	1314	ConvBi		num	0	Thursday	1314	ConvBi		num	3	Thursday	1314	ConvBi		num	0	Thursday	1314	ConvBi		num	0	Thursday	1314	ConvBi		num	0	Thursday	1314	ConvBi		num	0	Thursday	1314	ConvBi
num	0	Thursday	1314	HybAr		num	7	Thursday	1314	HybAr		num	3	Thursday	1314	HybAr		num	8	Thursday	1314	HybAr		num	5	Thursday	1314	HybAr		num	5	Thursday	1314	HybAr		num	0	Thursday	1314	HybAr
num	0	Thursday	1314	HybTw		num	1	Thursday	1314	HybTw		num	1	Thursday	1314	HybTw		num	1	Thursday	1314	HybTw		num	0	Thursday	1314	HybTw		num	0	Thursday	1314	HybTw		num	0	Thursday	1314	HybTw
num	0	Thursday	1314	PlugTw		num	1	Thursday	1314	PlugTw		num	0	Thursday	1314	PlugTw		num	0	Thursday	1314	PlugTw		num	5	Thursday	1314	PlugTw		num	5	Thursday	1314	PlugTw		num	14	Thursday	1314	PlugTw
num	6	Thursday	1415	ConvBi		num	0	Thursday	1415	ConvBi		num	4	Thursday	1415	ConvBi		num	0	Thursday	1415	ConvBi		num	0	Thursday	1415	ConvBi		num	0	Thursday	1415	ConvBi		num	0	Thursday	1415	ConvBi
num	0	Thursday	1415	HybAr		num	10	Thursday	1415	HybAr		num	3	Thursday	1415	HybAr		num	10	Thursday	1415	HybAr		num	8	Thursday	1415	HybAr		num	6	Thursday	1415	HybAr		num	0	Thursday	1415	HybAr
num	0	Thursday	1415	HybTw		num	0	Thursday	1415	HybTw		num	1	Thursday	1415	HybTw		num	0	Thursday	1415	HybTw		num	0	Thursday	1415	HybTw		num	0	Thursday	1415	HybTw		num	0	Thursday	1415	HybTw
num	0	Thursday	1415	PlugTw		num	0	Thursday	1415	PlugTw		num	0	Thursday	1415	PlugTw		num	0	Thursday	1415	PlugTw		num	3	Thursday	1415	PlugTw		num	6	Thursday	1415	PlugTw		num	16	Thursday	1415	PlugTw
num	5	Thursday	1516	ConvBi		num	0	Thursday	1516	ConvBi		num	3	Thursday	1516	ConvBi		num	0	Thursday	1516	ConvBi		num	0	Thursday	1516	ConvBi		num	0	Thursday	1516	ConvBi		num	0	Thursday	1516	ConvBi
num	0	Thursday	1516	HybAr		num	7	Thursday	1516	HybAr		num	3	Thursday	1516	HybAr		num	8	Thursday	1516	HybAr		num	5	Thursday	1516	HybAr		num	5	Thursday	1516	HybAr		num	0	Thursday	1516	HybAr
num	0	Thursday	1516	HybTw		num	1	Thursday	1516	HybTw		num	1	Thursday	1516	HybTw		num	1	Thursday	1516	HybTw		num	0	Thursday	1516	HybTw		num	0	Thursday	1516	HybTw		num	0	Thursday	1516	HybTw
num	0	Thursday	1516	PlugTw		num	1	Thursday	1516	PlugTw		num	0	Thursday	1516	PlugTw		num	0	Thursday	1516	PlugTw		num	5	Thursday	1516	PlugTw		num	5	Thursday	1516	PlugTw		num	14	Thursday	1516	PlugTw
num	6	Thursday	1617	ConvBi		num	0	Thursday	1617	ConvBi		num	4	Thursday	1617	ConvBi		num	0	Thursday	1617	ConvBi		num	0	Thursday	1617	ConvBi		num	0	Thursday	1617	ConvBi		num	0	Thursday	1617	ConvBi
num	0	Thursday	1617	HybAr		num	10	Thursday	1617	HybAr		num	3	Thursday	1617	HybAr		num	10	Thursday	1617	HybAr		num	8	Thursday	1617	HybAr		num	6	Thursday	1617	HybAr		num	0	Thursday	1617	HybAr
num	0	Thursday	1617	HybTw		num	0	Thursday	1617	HybTw		num	1	Thursday	1617	HybTw		num	0	Thursday	1617	HybTw		num	0	Thursday	1617	HybTw		num	0	Thursday	1617	HybTw		num	0	Thursday	1617	HybTw
num	0	Thursday	1617	PlugTw		num	0	Thursday	1617	PlugTw		num	0	Thursday	1617	PlugTw		num	0	Thursday	1617	PlugTw		num	3	Thursday	1617	PlugTw		num	6	Thursday	1617	PlugTw		num	16	Thursday	1617	PlugTw
num	7	Thursday	1718	ConvBi		num	0	Thursday	1718	ConvBi		num	4	Thursday	1718	ConvBi		num	0	Thursday	1718	ConvBi		num	0	Thursday	1718	ConvBi		num	0	Thursday	1718	ConvBi		num	0	Thursday	1718	ConvBi
num	0	Thursday	1718	HybAr		num	11	Thursday	1718	HybAr		num	5	Thursday	1718	HybAr		num	11	Thursday	1718	HybAr		num	9	Thursday	1718	HybAr		num	7	Thursday	1718	HybAr		num	0	Thursday	1718	HybAr
num	0	Thursday	1718	HybTw		num	1	Thursday	1718	HybTw		num	0	Thursday	1718	HybTw		num	1	Thursday	1718	HybTw		num	0	Thursday	1718	HybTw		num	0	Thursday	1718	HybTw		num	0	Thursday	1718	HybTw
num	0	Thursday	1718	PlugTw		num	0	Thursday	1718	PlugTw		num	0	Thursday	1718	PlugTw		num	0	Thursday	1718	PlugTw		num	4	Thursday	1718	PlugTw		num	7	Thursday	1718	PlugTw		num	19	Thursday	1718	PlugTw
num	8	Thursday	1819	ConvBi		num	0	Thursday	1819	ConvBi		num	5	Thursday	1819	ConvBi		num	0	Thursday	1819	ConvBi		num	0	Thursday	1819	ConvBi		num	0	Thursday	1819	ConvBi		num	0	Thursday	1819	ConvBi
num	0	Thursday	1819	HybAr		num	13	Thursday	1819	HybAr		num	5	Thursday	1819	HybAr		num	13	Thursday	1819	HybAr		num	10	Thursday	1819	HybAr		num	8	Thursday	1819	HybAr		num	0	Thursday	1819	HybAr
num	0	Thursday	1819	HybTw		num	0	Thursday	1819	HybTw		num	0	Thursday	1819	HybTw		num	0	Thursday	1819	HybTw		num	0	Thursday	1819	HybTw		num	0	Thursday	1819	HybTw		num	0	Thursday	1819	HybTw
num	0	Thursday	1819	PlugTw		num	0	Thursday	1819	PlugTw		num	0	Thursday	1819	PlugTw		num	0	Thursday	1819	PlugTw		num	5	Thursday	1819	PlugTw		num	8	Thursday	1819	PlugTw		num	21	Thursday	1819	PlugTw
num	8	Thursday	1920	ConvBi		num	0	Thursday	1920	ConvBi		num	5	Thursday	1920	ConvBi		num	0	Thursday	1920	ConvBi		num	0	Thursday	1920	ConvBi		num	0	Thursday	1920	ConvBi		num	0	Thursday	1920	ConvBi
num	0	Thursday	1920	HybAr		num	13	Thursday	1920	HybAr		num	5	Thursday	1920	HybAr		num	13	Thursday	1920	HybAr		num	10	Thursday	1920	HybAr		num	8	Thursday	1920	HybAr		num	0	Thursday	1920	HybAr
num	0	Thursday	1920	HybTw		num	0	Thursday	1920	HybTw		num	0	Thursday	1920	HybTw		num	0	Thursday	1920	HybTw		num	0	Thursday	1920	HybTw		num	0	Thursday	1920	HybTw		num	0	Thursday	1920	HybTw
num	0	Thursday	1920	PlugTw		num	0	Thursday	1920	PlugTw		num	0	Thursday	1920	PlugTw		num	0	Thursday	1920	PlugTw		num	5	Thursday	1920	PlugTw		num	8	Thursday	1920	PlugTw		num	21	Thursday	1920	PlugTw
num	5	Thursday	2021	ConvBi		num	0	Thursday	2021	ConvBi		num	3	Thursday	2021	ConvBi		num	0	Thursday	2021	ConvBi		num	0	Thursday	2021	ConvBi		num	0	Thursday	2021	ConvBi		num	0	Thursday	2021	ConvBi
num	0	Thursday	2021	HybAr		num	7	Thursday	2021	HybAr		num	3	Thursday	2021	HybAr		num	8	Thursday	2021	HybAr		num	5	Thursday	2021	HybAr		num	5	Thursday	2021	HybAr		num	0	Thursday	2021	HybAr
num	0	Thursday	2021	HybTw		num	1	Thursday	2021	HybTw		num	1	Thursday	2021	HybTw		num	1	Thursday	2021	HybTw		num	0	Thursday	2021	HybTw		num	0	Thursday	2021	HybTw		num	0	Thursday	2021	HybTw
num	0	Thursday	2021	PlugTw		num	1	Thursday	2021	PlugTw		num	0	Thursday	2021	PlugTw		num	0	Thursday	2021	PlugTw		num	5	Thursday	2021	PlugTw		num	5	Thursday	2021	PlugTw		num	14	Thursday	2021	PlugTw
num	6	Thursday	2122	ConvBi		num	0	Thursday	2122	ConvBi		num	4	Thursday	2122	ConvBi		num	0	Thursday	2122	ConvBi		num	0	Thursday	2122	ConvBi		num	0	Thursday	2122	ConvBi		num	0	Thursday	2122	ConvBi
num	0	Thursday	2122	HybAr		num	10	Thursday	2122	HybAr		num	3	Thursday	2122	HybAr		num	10	Thursday	2122	HybAr		num	8	Thursday	2122	HybAr		num	6	Thursday	2122	HybAr		num	0	Thursday	2122	HybAr
num	0	Thursday	2122	HybTw		num	0	Thursday	2122	HybTw		num	1	Thursday	2122	HybTw		num	0	Thursday	2122	HybTw		num	0	Thursday	2122	HybTw		num	0	Thursday	2122	HybTw		num	0	Thursday	2122	HybTw
num	0	Thursday	2122	PlugTw		num	0	Thursday	2122	PlugTw		num	0	Thursday	2122	PlugTw		num	0	Thursday	2122	PlugTw		num	3	Thursday	2122	PlugTw		num	6	Thursday	2122	PlugTw		num	16	Thursday	2122	PlugTw
num	5	Thursday	2223	ConvBi		num	0	Thursday	2223	ConvBi		num	3	Thursday	2223	ConvBi		num	0	Thursday	2223	ConvBi		num	0	Thursday	2223	ConvBi		num	0	Thursday	2223	ConvBi		num	0	Thursday	2223	ConvBi
num	0	Thursday	2223	HybAr		num	7	Thursday	2223	HybAr		num	3	Thursday	2223	HybAr		num	8	Thursday	2223	HybAr		num	5	Thursday	2223	HybAr		num	5	Thursday	2223	HybAr		num	0	Thursday	2223	HybAr
num	0	Thursday	2223	HybTw		num	1	Thursday	2223	HybTw		num	1	Thursday	2223	HybTw		num	1	Thursday	2223	HybTw		num	0	Thursday	2223	HybTw		num	0	Thursday	2223	HybTw		num	0	Thursday	2223	HybTw
num	0	Thursday	2223	PlugTw		num	1	Thursday	2223	PlugTw		num	0	Thursday	2223	PlugTw		num	0	Thursday	2223	PlugTw		num	5	Thursday	2223	PlugTw		num	5	Thursday	2223	PlugTw		num	14	Thursday	2223	PlugTw
num	5	Thursday	2324	ConvBi		num	0	Thursday	2324	ConvBi		num	3	Thursday	2324	ConvBi		num	0	Thursday	2324	ConvBi		num	0	Thursday	2324	ConvBi		num	0	Thursday	2324	ConvBi		num	0	Thursday	2324	ConvBi
num	0	Thursday	2324	HybAr		num	7	Thursday	2324	HybAr		num	3	Thursday	2324	HybAr		num	8	Thursday	2324	HybAr		num	5	Thursday	2324	HybAr		num	5	Thursday	2324	HybAr		num	0	Thursday	2324	HybAr
num	0	Thursday	2324	HybTw		num	1	Thursday	2324	HybTw		num	1	Thursday	2324	HybTw		num	1	Thursday	2324	HybTw		num	0	Thursday	2324	HybTw		num	0	Thursday	2324	HybTw		num	0	Thursday	2324	HybTw
num	0	Thursday	2324	PlugTw		num	1	Thursday	2324	PlugTw		num	0	Thursday	2324	PlugTw		num	0	Thursday	2324	PlugTw		num	5	Thursday	2324	PlugTw		num	5	Thursday	2324	PlugTw		num	14	Thursday	2324	PlugTw
num	3	Tuesday	0506	ConvBi		num	0	Tuesday	0506	ConvBi		num	2	Tuesday	0506	ConvBi		num	0	Tuesday	0506	ConvBi		num	0	Tuesday	0506	ConvBi		num	0	Tuesday	0506	ConvBi		num	0	Tuesday	0506	ConvBi
num	0	Tuesday	0506	HybAr		num	5	Tuesday	0506	HybAr		num	1	Tuesday	0506	HybAr		num	5	Tuesday	0506	HybAr		num	3	Tuesday	0506	HybAr		num	3	Tuesday	0506	HybAr		num	0	Tuesday	0506	HybAr
num	0	Tuesday	0506	HybTw		num	0	Tuesday	0506	HybTw		num	0	Tuesday	0506	HybTw		num	0	Tuesday	0506	HybTw		num	0	Tuesday	0506	HybTw		num	0	Tuesday	0506	HybTw		num	0	Tuesday	0506	HybTw
num	0	Tuesday	0506	PlugTw		num	0	Tuesday	0506	PlugTw		num	1	Tuesday	0506	PlugTw		num	0	Tuesday	0506	PlugTw		num	3	Tuesday	0506	PlugTw		num	3	Tuesday	0506	PlugTw		num	8	Tuesday	0506	PlugTw
num	5	Tuesday	0607	ConvBi		num	0	Tuesday	0607	ConvBi		num	3	Tuesday	0607	ConvBi		num	0	Tuesday	0607	ConvBi		num	0	Tuesday	0607	ConvBi		num	0	Tuesday	0607	ConvBi		num	0	Tuesday	0607	ConvBi
num	0	Tuesday	0607	HybAr		num	7	Tuesday	0607	HybAr		num	3	Tuesday	0607	HybAr		num	8	Tuesday	0607	HybAr		num	5	Tuesday	0607	HybAr		num	5	Tuesday	0607	HybAr		num	0	Tuesday	0607	HybAr
num	0	Tuesday	0607	HybTw		num	1	Tuesday	0607	HybTw		num	1	Tuesday	0607	HybTw		num	1	Tuesday	0607	HybTw		num	0	Tuesday	0607	HybTw		num	0	Tuesday	0607	HybTw		num	0	Tuesday	0607	HybTw
num	0	Tuesday	0607	PlugTw		num	1	Tuesday	0607	PlugTw		num	0	Tuesday	0607	PlugTw		num	0	Tuesday	0607	PlugTw		num	5	Tuesday	0607	PlugTw		num	5	Tuesday	0607	PlugTw		num	14	Tuesday	0607	PlugTw
num	8	Tuesday	0708	ConvBi		num	0	Tuesday	0708	ConvBi		num	5	Tuesday	0708	ConvBi		num	0	Tuesday	0708	ConvBi		num	0	Tuesday	0708	ConvBi		num	0	Tuesday	0708	ConvBi		num	0	Tuesday	0708	ConvBi
num	0	Tuesday	0708	HybAr		num	13	Tuesday	0708	HybAr		num	5	Tuesday	0708	HybAr		num	13	Tuesday	0708	HybAr		num	10	Tuesday	0708	HybAr		num	8	Tuesday	0708	HybAr		num	0	Tuesday	0708	HybAr
num	0	Tuesday	0708	HybTw		num	0	Tuesday	0708	HybTw		num	0	Tuesday	0708	HybTw		num	0	Tuesday	0708	HybTw		num	0	Tuesday	0708	HybTw		num	0	Tuesday	0708	HybTw		num	0	Tuesday	0708	HybTw
num	0	Tuesday	0708	PlugTw		num	0	Tuesday	0708	PlugTw		num	0	Tuesday	0708	PlugTw		num	0	Tuesday	0708	PlugTw		num	5	Tuesday	0708	PlugTw		num	8	Tuesday	0708	PlugTw		num	21	Tuesday	0708	PlugTw
num	5	Tuesday	0809	ConvBi		num	0	Tuesday	0809	ConvBi		num	3	Tuesday	0809	ConvBi		num	0	Tuesday	0809	ConvBi		num	0	Tuesday	0809	ConvBi		num	0	Tuesday	0809	ConvBi		num	0	Tuesday	0809	ConvBi
num	0	Tuesday	0809	HybAr		num	7	Tuesday	0809	HybAr		num	3	Tuesday	0809	HybAr		num	8	Tuesday	0809	HybAr		num	5	Tuesday	0809	HybAr		num	5	Tuesday	0809	HybAr		num	0	Tuesday	0809	HybAr
num	0	Tuesday	0809	HybTw		num	1	Tuesday	0809	HybTw		num	1	Tuesday	0809	HybTw		num	1	Tuesday	0809	HybTw		num	0	Tuesday	0809	HybTw		num	0	Tuesday	0809	HybTw		num	0	Tuesday	0809	HybTw
num	0	Tuesday	0809	PlugTw		num	1	Tuesday	0809	PlugTw		num	0	Tuesday	0809	PlugTw		num	0	Tuesday	0809	PlugTw		num	5	Tuesday	0809	PlugTw		num	5	Tuesday	0809	PlugTw		num	14	Tuesday	0809	PlugTw
num	6	Tuesday	0910	ConvBi		num	0	Tuesday	0910	ConvBi		num	4	Tuesday	0910	ConvBi		num	0	Tuesday	0910	ConvBi		num	0	Tuesday	0910	ConvBi		num	0	Tuesday	0910	ConvBi		num	0	Tuesday	0910	ConvBi
num	0	Tuesday	0910	HybAr		num	10	Tuesday	0910	HybAr		num	3	Tuesday	0910	HybAr		num	10	Tuesday	0910	HybAr		num	8	Tuesday	0910	HybAr		num	6	Tuesday	0910	HybAr		num	0	Tuesday	0910	HybAr
num	0	Tuesday	0910	HybTw		num	0	Tuesday	0910	HybTw		num	1	Tuesday	0910	HybTw		num	0	Tuesday	0910	HybTw		num	0	Tuesday	0910	HybTw		num	0	Tuesday	0910	HybTw		num	0	Tuesday	0910	HybTw
num	0	Tuesday	0910	PlugTw		num	0	Tuesday	0910	PlugTw		num	0	Tuesday	0910	PlugTw		num	0	Tuesday	0910	PlugTw		num	3	Tuesday	0910	PlugTw		num	6	Tuesday	0910	PlugTw		num	16	Tuesday	0910	PlugTw
num	5	Tuesday	1011	ConvBi		num	0	Tuesday	1011	ConvBi		num	3	Tuesday	1011	ConvBi		num	0	Tuesday	1011	ConvBi		num	0	Tuesday	1011	ConvBi		num	0	Tuesday	1011	ConvBi		num	0	Tuesday	1011	ConvBi
num	0	Tuesday	1011	HybAr		num	7	Tuesday	1011	HybAr		num	3	Tuesday	1011	HybAr		num	8	Tuesday	1011	HybAr		num	5	Tuesday	1011	HybAr		num	5	Tuesday	1011	HybAr		num	0	Tuesday	1011	HybAr
num	0	Tuesday	1011	HybTw		num	1	Tuesday	1011	HybTw		num	1	Tuesday	1011	HybTw		num	1	Tuesday	1011	HybTw		num	0	Tuesday	1011	HybTw		num	0	Tuesday	1011	HybTw		num	0	Tuesday	1011	HybTw
num	0	Tuesday	1011	PlugTw		num	1	Tuesday	1011	PlugTw		num	0	Tuesday	1011	PlugTw		num	0	Tuesday	1011	PlugTw		num	5	Tuesday	1011	PlugTw		num	5	Tuesday	1011	PlugTw		num	14	Tuesday	1011	PlugTw
num	6	Tuesday	1112	ConvBi		num	0	Tuesday	1112	ConvBi		num	4	Tuesday	1112	ConvBi		num	0	Tuesday	1112	ConvBi		num	0	Tuesday	1112	ConvBi		num	0	Tuesday	1112	ConvBi		num	0	Tuesday	1112	ConvBi
num	0	Tuesday	1112	HybAr		num	10	Tuesday	1112	HybAr		num	3	Tuesday	1112	HybAr		num	10	Tuesday	1112	HybAr		num	8	Tuesday	1112	HybAr		num	6	Tuesday	1112	HybAr		num	0	Tuesday	1112	HybAr
num	0	Tuesday	1112	HybTw		num	0	Tuesday	1112	HybTw		num	1	Tuesday	1112	HybTw		num	0	Tuesday	1112	HybTw		num	0	Tuesday	1112	HybTw		num	0	Tuesday	1112	HybTw		num	0	Tuesday	1112	HybTw
num	0	Tuesday	1112	PlugTw		num	0	Tuesday	1112	PlugTw		num	0	Tuesday	1112	PlugTw		num	0	Tuesday	1112	PlugTw		num	3	Tuesday	1112	PlugTw		num	6	Tuesday	1112	PlugTw		num	16	Tuesday	1112	PlugTw
num	5	Tuesday	1213	ConvBi		num	0	Tuesday	1213	ConvBi		num	3	Tuesday	1213	ConvBi		num	0	Tuesday	1213	ConvBi		num	0	Tuesday	1213	ConvBi		num	0	Tuesday	1213	ConvBi		num	0	Tuesday	1213	ConvBi
num	0	Tuesday	1213	HybAr		num	7	Tuesday	1213	HybAr		num	3	Tuesday	1213	HybAr		num	8	Tuesday	1213	HybAr		num	5	Tuesday	1213	HybAr		num	5	Tuesday	1213	HybAr		num	0	Tuesday	1213	HybAr
num	0	Tuesday	1213	HybTw		num	1	Tuesday	1213	HybTw		num	1	Tuesday	1213	HybTw		num	1	Tuesday	1213	HybTw		num	0	Tuesday	1213	HybTw		num	0	Tuesday	1213	HybTw		num	0	Tuesday	1213	HybTw
num	0	Tuesday	1213	PlugTw		num	1	Tuesday	1213	PlugTw		num	0	Tuesday	1213	PlugTw		num	0	Tuesday	1213	PlugTw		num	5	Tuesday	1213	PlugTw		num	5	Tuesday	1213	PlugTw		num	14	Tuesday	1213	PlugTw
num	5	Tuesday	1314	ConvBi		num	0	Tuesday	1314	ConvBi		num	3	Tuesday	1314	ConvBi		num	0	Tuesday	1314	ConvBi		num	0	Tuesday	1314	ConvBi		num	0	Tuesday	1314	ConvBi		num	0	Tuesday	1314	ConvBi
num	0	Tuesday	1314	HybAr		num	7	Tuesday	1314	HybAr		num	3	Tuesday	1314	HybAr		num	8	Tuesday	1314	HybAr		num	5	Tuesday	1314	HybAr		num	5	Tuesday	1314	HybAr		num	0	Tuesday	1314	HybAr
num	0	Tuesday	1314	HybTw		num	1	Tuesday	1314	HybTw		num	1	Tuesday	1314	HybTw		num	1	Tuesday	1314	HybTw		num	0	Tuesday	1314	HybTw		num	0	Tuesday	1314	HybTw		num	0	Tuesday	1314	HybTw
num	0	Tuesday	1314	PlugTw		num	1	Tuesday	1314	PlugTw		num	0	Tuesday	1314	PlugTw		num	0	Tuesday	1314	PlugTw		num	5	Tuesday	1314	PlugTw		num	5	Tuesday	1314	PlugTw		num	14	Tuesday	1314	PlugTw
num	6	Tuesday	1415	ConvBi		num	0	Tuesday	1415	ConvBi		num	4	Tuesday	1415	ConvBi		num	0	Tuesday	1415	ConvBi		num	0	Tuesday	1415	ConvBi		num	0	Tuesday	1415	ConvBi		num	0	Tuesday	1415	ConvBi
num	0	Tuesday	1415	HybAr		num	10	Tuesday	1415	HybAr		num	3	Tuesday	1415	HybAr		num	10	Tuesday	1415	HybAr		num	8	Tuesday	1415	HybAr		num	6	Tuesday	1415	HybAr		num	0	Tuesday	1415	HybAr
num	0	Tuesday	1415	HybTw		num	0	Tuesday	1415	HybTw		num	1	Tuesday	1415	HybTw		num	0	Tuesday	1415	HybTw		num	0	Tuesday	1415	HybTw		num	0	Tuesday	1415	HybTw		num	0	Tuesday	1415	HybTw
num	0	Tuesday	1415	PlugTw		num	0	Tuesday	1415	PlugTw		num	0	Tuesday	1415	PlugTw		num	0	Tuesday	1415	PlugTw		num	3	Tuesday	1415	PlugTw		num	6	Tuesday	1415	PlugTw		num	16	Tuesday	1415	PlugTw
num	5	Tuesday	1516	ConvBi		num	0	Tuesday	1516	ConvBi		num	3	Tuesday	1516	ConvBi		num	0	Tuesday	1516	ConvBi		num	0	Tuesday	1516	ConvBi		num	0	Tuesday	1516	ConvBi		num	0	Tuesday	1516	ConvBi
num	0	Tuesday	1516	HybAr		num	7	Tuesday	1516	HybAr		num	3	Tuesday	1516	HybAr		num	8	Tuesday	1516	HybAr		num	5	Tuesday	1516	HybAr		num	5	Tuesday	1516	HybAr		num	0	Tuesday	1516	HybAr
num	0	Tuesday	1516	HybTw		num	1	Tuesday	1516	HybTw		num	1	Tuesday	1516	HybTw		num	1	Tuesday	1516	HybTw		num	0	Tuesday	1516	HybTw		num	0	Tuesday	1516	HybTw		num	0	Tuesday	1516	HybTw
num	0	Tuesday	1516	PlugTw		num	1	Tuesday	1516	PlugTw		num	0	Tuesday	1516	PlugTw		num	0	Tuesday	1516	PlugTw		num	5	Tuesday	1516	PlugTw		num	5	Tuesday	1516	PlugTw		num	14	Tuesday	1516	PlugTw
num	6	Tuesday	1617	ConvBi		num	0	Tuesday	1617	ConvBi		num	4	Tuesday	1617	ConvBi		num	0	Tuesday	1617	ConvBi		num	0	Tuesday	1617	ConvBi		num	0	Tuesday	1617	ConvBi		num	0	Tuesday	1617	ConvBi
num	0	Tuesday	1617	HybAr		num	10	Tuesday	1617	HybAr		num	3	Tuesday	1617	HybAr		num	10	Tuesday	1617	HybAr		num	8	Tuesday	1617	HybAr		num	6	Tuesday	1617	HybAr		num	0	Tuesday	1617	HybAr
num	0	Tuesday	1617	HybTw		num	0	Tuesday	1617	HybTw		num	1	Tuesday	1617	HybTw		num	0	Tuesday	1617	HybTw		num	0	Tuesday	1617	HybTw		num	0	Tuesday	1617	HybTw		num	0	Tuesday	1617	HybTw
num	0	Tuesday	1617	PlugTw		num	0	Tuesday	1617	PlugTw		num	0	Tuesday	1617	PlugTw		num	0	Tuesday	1617	PlugTw		num	3	Tuesday	1617	PlugTw		num	6	Tuesday	1617	PlugTw		num	16	Tuesday	1617	PlugTw
num	7	Tuesday	1718	ConvBi		num	0	Tuesday	1718	ConvBi		num	4	Tuesday	1718	ConvBi		num	0	Tuesday	1718	ConvBi		num	0	Tuesday	1718	ConvBi		num	0	Tuesday	1718	ConvBi		num	0	Tuesday	1718	ConvBi
num	0	Tuesday	1718	HybAr		num	11	Tuesday	1718	HybAr		num	5	Tuesday	1718	HybAr		num	11	Tuesday	1718	HybAr		num	9	Tuesday	1718	HybAr		num	7	Tuesday	1718	HybAr		num	0	Tuesday	1718	HybAr
num	0	Tuesday	1718	HybTw		num	1	Tuesday	1718	HybTw		num	0	Tuesday	1718	HybTw		num	1	Tuesday	1718	HybTw		num	0	Tuesday	1718	HybTw		num	0	Tuesday	1718	HybTw		num	0	Tuesday	1718	HybTw
num	0	Tuesday	1718	PlugTw		num	0	Tuesday	1718	PlugTw		num	0	Tuesday	1718	PlugTw		num	0	Tuesday	1718	PlugTw		num	4	Tuesday	1718	PlugTw		num	7	Tuesday	1718	PlugTw		num	19	Tuesday	1718	PlugTw
num	8	Tuesday	1819	ConvBi		num	0	Tuesday	1819	ConvBi		num	5	Tuesday	1819	ConvBi		num	0	Tuesday	1819	ConvBi		num	0	Tuesday	1819	ConvBi		num	0	Tuesday	1819	ConvBi		num	0	Tuesday	1819	ConvBi
num	0	Tuesday	1819	HybAr		num	13	Tuesday	1819	HybAr		num	5	Tuesday	1819	HybAr		num	13	Tuesday	1819	HybAr		num	10	Tuesday	1819	HybAr		num	8	Tuesday	1819	HybAr		num	0	Tuesday	1819	HybAr
num	0	Tuesday	1819	HybTw		num	0	Tuesday	1819	HybTw		num	0	Tuesday	1819	HybTw		num	0	Tuesday	1819	HybTw		num	0	Tuesday	1819	HybTw		num	0	Tuesday	1819	HybTw		num	0	Tuesday	1819	HybTw
num	0	Tuesday	1819	PlugTw		num	0	Tuesday	1819	PlugTw		num	0	Tuesday	1819	PlugTw		num	0	Tuesday	1819	PlugTw		num	5	Tuesday	1819	PlugTw		num	8	Tuesday	1819	PlugTw		num	21	Tuesday	1819	PlugTw
num	8	Tuesday	1920	ConvBi		num	0	Tuesday	1920	ConvBi		num	5	Tuesday	1920	ConvBi		num	0	Tuesday	1920	ConvBi		num	0	Tuesday	1920	ConvBi		num	0	Tuesday	1920	ConvBi		num	0	Tuesday	1920	ConvBi
num	0	Tuesday	1920	HybAr		num	13	Tuesday	1920	HybAr		num	5	Tuesday	1920	HybAr		num	13	Tuesday	1920	HybAr		num	10	Tuesday	1920	HybAr		num	8	Tuesday	1920	HybAr		num	0	Tuesday	1920	HybAr
num	0	Tuesday	1920	HybTw		num	0	Tuesday	1920	HybTw		num	0	Tuesday	1920	HybTw		num	0	Tuesday	1920	HybTw		num	0	Tuesday	1920	HybTw		num	0	Tuesday	1920	HybTw		num	0	Tuesday	1920	HybTw
num	0	Tuesday	1920	PlugTw		num	0	Tuesday	1920	PlugTw		num	0	Tuesday	1920	PlugTw		num	0	Tuesday	1920	PlugTw		num	5	Tuesday	1920	PlugTw		num	8	Tuesday	1920	PlugTw		num	21	Tuesday	1920	PlugTw
num	5	Tuesday	2021	ConvBi		num	0	Tuesday	2021	ConvBi		num	3	Tuesday	2021	ConvBi		num	0	Tuesday	2021	ConvBi		num	0	Tuesday	2021	ConvBi		num	0	Tuesday	2021	ConvBi		num	0	Tuesday	2021	ConvBi
num	0	Tuesday	2021	HybAr		num	7	Tuesday	2021	HybAr		num	3	Tuesday	2021	HybAr		num	8	Tuesday	2021	HybAr		num	5	Tuesday	2021	HybAr		num	5	Tuesday	2021	HybAr		num	0	Tuesday	2021	HybAr
num	0	Tuesday	2021	HybTw		num	1	Tuesday	2021	HybTw		num	1	Tuesday	2021	HybTw		num	1	Tuesday	2021	HybTw		num	0	Tuesday	2021	HybTw		num	0	Tuesday	2021	HybTw		num	0	Tuesday	2021	HybTw
num	0	Tuesday	2021	PlugTw		num	1	Tuesday	2021	PlugTw		num	0	Tuesday	2021	PlugTw		num	0	Tuesday	2021	PlugTw		num	5	Tuesday	2021	PlugTw		num	5	Tuesday	2021	PlugTw		num	14	Tuesday	2021	PlugTw
num	6	Tuesday	2122	ConvBi		num	0	Tuesday	2122	ConvBi		num	4	Tuesday	2122	ConvBi		num	0	Tuesday	2122	ConvBi		num	0	Tuesday	2122	ConvBi		num	0	Tuesday	2122	ConvBi		num	0	Tuesday	2122	ConvBi
num	0	Tuesday	2122	HybAr		num	10	Tuesday	2122	HybAr		num	3	Tuesday	2122	HybAr		num	10	Tuesday	2122	HybAr		num	8	Tuesday	2122	HybAr		num	6	Tuesday	2122	HybAr		num	0	Tuesday	2122	HybAr
num	0	Tuesday	2122	HybTw		num	0	Tuesday	2122	HybTw		num	1	Tuesday	2122	HybTw		num	0	Tuesday	2122	HybTw		num	0	Tuesday	2122	HybTw		num	0	Tuesday	2122	HybTw		num	0	Tuesday	2122	HybTw
num	0	Tuesday	2122	PlugTw		num	0	Tuesday	2122	PlugTw		num	0	Tuesday	2122	PlugTw		num	0	Tuesday	2122	PlugTw		num	3	Tuesday	2122	PlugTw		num	6	Tuesday	2122	PlugTw		num	16	Tuesday	2122	PlugTw
num	5	Tuesday	2223	ConvBi		num	0	Tuesday	2223	ConvBi		num	3	Tuesday	2223	ConvBi		num	0	Tuesday	2223	ConvBi		num	0	Tuesday	2223	ConvBi		num	0	Tuesday	2223	ConvBi		num	0	Tuesday	2223	ConvBi
num	0	Tuesday	2223	HybAr		num	7	Tuesday	2223	HybAr		num	3	Tuesday	2223	HybAr		num	8	Tuesday	2223	HybAr		num	5	Tuesday	2223	HybAr		num	5	Tuesday	2223	HybAr		num	0	Tuesday	2223	HybAr
num	0	Tuesday	2223	HybTw		num	1	Tuesday	2223	HybTw		num	1	Tuesday	2223	HybTw		num	1	Tuesday	2223	HybTw		num	0	Tuesday	2223	HybTw		num	0	Tuesday	2223	HybTw		num	0	Tuesday	2223	HybTw
num	0	Tuesday	2223	PlugTw		num	1	Tuesday	2223	PlugTw		num	0	Tuesday	2223	PlugTw		num	0	Tuesday	2223	PlugTw		num	5	Tuesday	2223	PlugTw		num	5	Tuesday	2223	PlugTw		num	14	Tuesday	2223	PlugTw
num	5	Tuesday	2324	ConvBi		num	0	Tuesday	2324	ConvBi		num	3	Tuesday	2324	ConvBi		num	0	Tuesday	2324	ConvBi		num	0	Tuesday	2324	ConvBi		num	0	Tuesday	2324	ConvBi		num	0	Tuesday	2324	ConvBi
num	0	Tuesday	2324	HybAr		num	7	Tuesday	2324	HybAr		num	3	Tuesday	2324	HybAr		num	8	Tuesday	2324	HybAr		num	5	Tuesday	2324	HybAr		num	5	Tuesday	2324	HybAr		num	0	Tuesday	2324	HybAr
num	0	Tuesday	2324	HybTw		num	1	Tuesday	2324	HybTw		num	1	Tuesday	2324	HybTw		num	1	Tuesday	2324	HybTw		num	0	Tuesday	2324	HybTw		num	0	Tuesday	2324	HybTw		num	0	Tuesday	2324	HybTw
num	0	Tuesday	2324	PlugTw		num	1	Tuesday	2324	PlugTw		num	0	Tuesday	2324	PlugTw		num	0	Tuesday	2324	PlugTw		num	5	Tuesday	2324	PlugTw		num	5	Tuesday	2324	PlugTw		num	14	Tuesday	2324	PlugTw
num	3	Wednesday	0506	ConvBi		num	0	Wednesday	0506	ConvBi		num	2	Wednesday	0506	ConvBi		num	0	Wednesday	0506	ConvBi		num	0	Wednesday	0506	ConvBi		num	0	Wednesday	0506	ConvBi		num	0	Wednesday	0506	ConvBi
num	0	Wednesday	0506	HybAr		num	5	Wednesday	0506	HybAr		num	1	Wednesday	0506	HybAr		num	5	Wednesday	0506	HybAr		num	3	Wednesday	0506	HybAr		num	3	Wednesday	0506	HybAr		num	0	Wednesday	0506	HybAr
num	0	Wednesday	0506	HybTw		num	0	Wednesday	0506	HybTw		num	0	Wednesday	0506	HybTw		num	0	Wednesday	0506	HybTw		num	0	Wednesday	0506	HybTw		num	0	Wednesday	0506	HybTw		num	0	Wednesday	0506	HybTw
num	0	Wednesday	0506	PlugTw		num	0	Wednesday	0506	PlugTw		num	1	Wednesday	0506	PlugTw		num	0	Wednesday	0506	PlugTw		num	3	Wednesday	0506	PlugTw		num	3	Wednesday	0506	PlugTw		num	8	Wednesday	0506	PlugTw
num	5	Wednesday	0607	ConvBi		num	0	Wednesday	0607	ConvBi		num	3	Wednesday	0607	ConvBi		num	0	Wednesday	0607	ConvBi		num	0	Wednesday	0607	ConvBi		num	0	Wednesday	0607	ConvBi		num	0	Wednesday	0607	ConvBi
num	0	Wednesday	0607	HybAr		num	7	Wednesday	0607	HybAr		num	3	Wednesday	0607	HybAr		num	8	Wednesday	0607	HybAr		num	5	Wednesday	0607	HybAr		num	5	Wednesday	0607	HybAr		num	0	Wednesday	0607	HybAr
num	0	Wednesday	0607	HybTw		num	1	Wednesday	0607	HybTw		num	1	Wednesday	0607	HybTw		num	1	Wednesday	0607	HybTw		num	0	Wednesday	0607	HybTw		num	0	Wednesday	0607	HybTw		num	0	Wednesday	0607	HybTw
num	0	Wednesday	0607	PlugTw		num	1	Wednesday	0607	PlugTw		num	0	Wednesday	0607	PlugTw		num	0	Wednesday	0607	PlugTw		num	5	Wednesday	0607	PlugTw		num	5	Wednesday	0607	PlugTw		num	14	Wednesday	0607	PlugTw
num	8	Wednesday	0708	ConvBi		num	0	Wednesday	0708	ConvBi		num	5	Wednesday	0708	ConvBi		num	0	Wednesday	0708	ConvBi		num	0	Wednesday	0708	ConvBi		num	0	Wednesday	0708	ConvBi		num	0	Wednesday	0708	ConvBi
num	0	Wednesday	0708	HybAr		num	13	Wednesday	0708	HybAr		num	5	Wednesday	0708	HybAr		num	13	Wednesday	0708	HybAr		num	10	Wednesday	0708	HybAr		num	8	Wednesday	0708	HybAr		num	0	Wednesday	0708	HybAr
num	0	Wednesday	0708	HybTw		num	0	Wednesday	0708	HybTw		num	0	Wednesday	0708	HybTw		num	0	Wednesday	0708	HybTw		num	0	Wednesday	0708	HybTw		num	0	Wednesday	0708	HybTw		num	0	Wednesday	0708	HybTw
num	0	Wednesday	0708	PlugTw		num	0	Wednesday	0708	PlugTw		num	0	Wednesday	0708	PlugTw		num	0	Wednesday	0708	PlugTw		num	5	Wednesday	0708	PlugTw		num	8	Wednesday	0708	PlugTw		num	21	Wednesday	0708	PlugTw
num	5	Wednesday	0809	ConvBi		num	0	Wednesday	0809	ConvBi		num	3	Wednesday	0809	ConvBi		num	0	Wednesday	0809	ConvBi		num	0	Wednesday	0809	ConvBi		num	0	Wednesday	0809	ConvBi		num	0	Wednesday	0809	ConvBi
num	0	Wednesday	0809	HybAr		num	7	Wednesday	0809	HybAr		num	3	Wednesday	0809	HybAr		num	8	Wednesday	0809	HybAr		num	5	Wednesday	0809	HybAr		num	5	Wednesday	0809	HybAr		num	0	Wednesday	0809	HybAr
num	0	Wednesday	0809	HybTw		num	1	Wednesday	0809	HybTw		num	1	Wednesday	0809	HybTw		num	1	Wednesday	0809	HybTw		num	0	Wednesday	0809	HybTw		num	0	Wednesday	0809	HybTw		num	0	Wednesday	0809	HybTw
num	0	Wednesday	0809	PlugTw		num	1	Wednesday	0809	PlugTw		num	0	Wednesday	0809	PlugTw		num	0	Wednesday	0809	PlugTw		num	5	Wednesday	0809	PlugTw		num	5	Wednesday	0809	PlugTw		num	14	Wednesday	0809	PlugTw
num	6	Wednesday	0910	ConvBi		num	0	Wednesday	0910	ConvBi		num	4	Wednesday	0910	ConvBi		num	0	Wednesday	0910	ConvBi		num	0	Wednesday	0910	ConvBi		num	0	Wednesday	0910	ConvBi		num	0	Wednesday	0910	ConvBi
num	0	Wednesday	0910	HybAr		num	10	Wednesday	0910	HybAr		num	3	Wednesday	0910	HybAr		num	10	Wednesday	0910	HybAr		num	8	Wednesday	0910	HybAr		num	6	Wednesday	0910	HybAr		num	0	Wednesday	0910	HybAr
num	0	Wednesday	0910	HybTw		num	0	Wednesday	0910	HybTw		num	1	Wednesday	0910	HybTw		num	0	Wednesday	0910	HybTw		num	0	Wednesday	0910	HybTw		num	0	Wednesday	0910	HybTw		num	0	Wednesday	0910	HybTw
num	0	Wednesday	0910	PlugTw		num	0	Wednesday	0910	PlugTw		num	0	Wednesday	0910	PlugTw		num	0	Wednesday	0910	PlugTw		num	3	Wednesday	0910	PlugTw		num	6	Wednesday	0910	PlugTw		num	16	Wednesday	0910	PlugTw
num	5	Wednesday	1011	ConvBi		num	0	Wednesday	1011	ConvBi		num	3	Wednesday	1011	ConvBi		num	0	Wednesday	1011	ConvBi		num	0	Wednesday	1011	ConvBi		num	0	Wednesday	1011	ConvBi		num	0	Wednesday	1011	ConvBi
num	0	Wednesday	1011	HybAr		num	7	Wednesday	1011	HybAr		num	3	Wednesday	1011	HybAr		num	8	Wednesday	1011	HybAr		num	5	Wednesday	1011	HybAr		num	5	Wednesday	1011	HybAr		num	0	Wednesday	1011	HybAr
num	0	Wednesday	1011	HybTw		num	1	Wednesday	1011	HybTw		num	1	Wednesday	1011	HybTw		num	1	Wednesday	1011	HybTw		num	0	Wednesday	1011	HybTw		num	0	Wednesday	1011	HybTw		num	0	Wednesday	1011	HybTw
num	0	Wednesday	1011	PlugTw		num	1	Wednesday	1011	PlugTw		num	0	Wednesday	1011	PlugTw		num	0	Wednesday	1011	PlugTw		num	5	Wednesday	1011	PlugTw		num	5	Wednesday	1011	PlugTw		num	14	Wednesday	1011	PlugTw
num	6	Wednesday	1112	ConvBi		num	0	Wednesday	1112	ConvBi		num	4	Wednesday	1112	ConvBi		num	0	Wednesday	1112	ConvBi		num	0	Wednesday	1112	ConvBi		num	0	Wednesday	1112	ConvBi		num	0	Wednesday	1112	ConvBi
num	0	Wednesday	1112	HybAr		num	10	Wednesday	1112	HybAr		num	3	Wednesday	1112	HybAr		num	10	Wednesday	1112	HybAr		num	8	Wednesday	1112	HybAr		num	6	Wednesday	1112	HybAr		num	0	Wednesday	1112	HybAr
num	0	Wednesday	1112	HybTw		num	0	Wednesday	1112	HybTw		num	1	Wednesday	1112	HybTw		num	0	Wednesday	1112	HybTw		num	0	Wednesday	1112	HybTw		num	0	Wednesday	1112	HybTw		num	0	Wednesday	1112	HybTw
num	0	Wednesday	1112	PlugTw		num	0	Wednesday	1112	PlugTw		num	0	Wednesday	1112	PlugTw		num	0	Wednesday	1112	PlugTw		num	3	Wednesday	1112	PlugTw		num	6	Wednesday	1112	PlugTw		num	16	Wednesday	1112	PlugTw
num	5	Wednesday	1213	ConvBi		num	0	Wednesday	1213	ConvBi		num	3	Wednesday	1213	ConvBi		num	0	Wednesday	1213	ConvBi		num	0	Wednesday	1213	ConvBi		num	0	Wednesday	1213	ConvBi		num	0	Wednesday	1213	ConvBi
num	0	Wednesday	1213	HybAr		num	7	Wednesday	1213	HybAr		num	3	Wednesday	1213	HybAr		num	8	Wednesday	1213	HybAr		num	5	Wednesday	1213	HybAr		num	5	Wednesday	1213	HybAr		num	0	Wednesday	1213	HybAr
num	0	Wednesday	1213	HybTw		num	1	Wednesday	1213	HybTw		num	1	Wednesday	1213	HybTw		num	1	Wednesday	1213	HybTw		num	0	Wednesday	1213	HybTw		num	0	Wednesday	1213	HybTw		num	0	Wednesday	1213	HybTw
num	0	Wednesday	1213	PlugTw		num	1	Wednesday	1213	PlugTw		num	0	Wednesday	1213	PlugTw		num	0	Wednesday	1213	PlugTw		num	5	Wednesday	1213	PlugTw		num	5	Wednesday	1213	PlugTw		num	14	Wednesday	1213	PlugTw
num	5	Wednesday	1314	ConvBi		num	0	Wednesday	1314	ConvBi		num	3	Wednesday	1314	ConvBi		num	0	Wednesday	1314	ConvBi		num	0	Wednesday	1314	ConvBi		num	0	Wednesday	1314	ConvBi		num	0	Wednesday	1314	ConvBi
num	0	Wednesday	1314	HybAr		num	7	Wednesday	1314	HybAr		num	3	Wednesday	1314	HybAr		num	8	Wednesday	1314	HybAr		num	5	Wednesday	1314	HybAr		num	5	Wednesday	1314	HybAr		num	0	Wednesday	1314	HybAr
num	0	Wednesday	1314	HybTw		num	1	Wednesday	1314	HybTw		num	1	Wednesday	1314	HybTw		num	1	Wednesday	1314	HybTw		num	0	Wednesday	1314	HybTw		num	0	Wednesday	1314	HybTw		num	0	Wednesday	1314	HybTw
num	0	Wednesday	1314	PlugTw		num	1	Wednesday	1314	PlugTw		num	0	Wednesday	1314	PlugTw		num	0	Wednesday	1314	PlugTw		num	5	Wednesday	1314	PlugTw		num	5	Wednesday	1314	PlugTw		num	14	Wednesday	1314	PlugTw
num	6	Wednesday	1415	ConvBi		num	0	Wednesday	1415	ConvBi		num	4	Wednesday	1415	ConvBi		num	0	Wednesday	1415	ConvBi		num	0	Wednesday	1415	ConvBi		num	0	Wednesday	1415	ConvBi		num	0	Wednesday	1415	ConvBi
num	0	Wednesday	1415	HybAr		num	10	Wednesday	1415	HybAr		num	3	Wednesday	1415	HybAr		num	10	Wednesday	1415	HybAr		num	8	Wednesday	1415	HybAr		num	6	Wednesday	1415	HybAr		num	0	Wednesday	1415	HybAr
num	0	Wednesday	1415	HybTw		num	0	Wednesday	1415	HybTw		num	1	Wednesday	1415	HybTw		num	0	Wednesday	1415	HybTw		num	0	Wednesday	1415	HybTw		num	0	Wednesday	1415	HybTw		num	0	Wednesday	1415	HybTw
num	0	Wednesday	1415	PlugTw		num	0	Wednesday	1415	PlugTw		num	0	Wednesday	1415	PlugTw		num	0	Wednesday	1415	PlugTw		num	3	Wednesday	1415	PlugTw		num	6	Wednesday	1415	PlugTw		num	16	Wednesday	1415	PlugTw
num	5	Wednesday	1516	ConvBi		num	0	Wednesday	1516	ConvBi		num	3	Wednesday	1516	ConvBi		num	0	Wednesday	1516	ConvBi		num	0	Wednesday	1516	ConvBi		num	0	Wednesday	1516	ConvBi		num	0	Wednesday	1516	ConvBi
num	0	Wednesday	1516	HybAr		num	7	Wednesday	1516	HybAr		num	3	Wednesday	1516	HybAr		num	8	Wednesday	1516	HybAr		num	5	Wednesday	1516	HybAr		num	5	Wednesday	1516	HybAr		num	0	Wednesday	1516	HybAr
num	0	Wednesday	1516	HybTw		num	1	Wednesday	1516	HybTw		num	1	Wednesday	1516	HybTw		num	1	Wednesday	1516	HybTw		num	0	Wednesday	1516	HybTw		num	0	Wednesday	1516	HybTw		num	0	Wednesday	1516	HybTw
num	0	Wednesday	1516	PlugTw		num	1	Wednesday	1516	PlugTw		num	0	Wednesday	1516	PlugTw		num	0	Wednesday	1516	PlugTw		num	5	Wednesday	1516	PlugTw		num	5	Wednesday	1516	PlugTw		num	14	Wednesday	1516	PlugTw
num	6	Wednesday	1617	ConvBi		num	0	Wednesday	1617	ConvBi		num	4	Wednesday	1617	ConvBi		num	0	Wednesday	1617	ConvBi		num	0	Wednesday	1617	ConvBi		num	0	Wednesday	1617	ConvBi		num	0	Wednesday	1617	ConvBi
num	0	Wednesday	1617	HybAr		num	10	Wednesday	1617	HybAr		num	3	Wednesday	1617	HybAr		num	10	Wednesday	1617	HybAr		num	8	Wednesday	1617	HybAr		num	6	Wednesday	1617	HybAr		num	0	Wednesday	1617	HybAr
num	0	Wednesday	1617	HybTw		num	0	Wednesday	1617	HybTw		num	1	Wednesday	1617	HybTw		num	0	Wednesday	1617	HybTw		num	0	Wednesday	1617	HybTw		num	0	Wednesday	1617	HybTw		num	0	Wednesday	1617	HybTw
num	0	Wednesday	1617	PlugTw		num	0	Wednesday	1617	PlugTw		num	0	Wednesday	1617	PlugTw		num	0	Wednesday	1617	PlugTw		num	3	Wednesday	1617	PlugTw		num	6	Wednesday	1617	PlugTw		num	16	Wednesday	1617	PlugTw
num	7	Wednesday	1718	ConvBi		num	0	Wednesday	1718	ConvBi		num	4	Wednesday	1718	ConvBi		num	0	Wednesday	1718	ConvBi		num	0	Wednesday	1718	ConvBi		num	0	Wednesday	1718	ConvBi		num	0	Wednesday	1718	ConvBi
num	0	Wednesday	1718	HybAr		num	11	Wednesday	1718	HybAr		num	5	Wednesday	1718	HybAr		num	11	Wednesday	1718	HybAr		num	9	Wednesday	1718	HybAr		num	7	Wednesday	1718	HybAr		num	0	Wednesday	1718	HybAr
num	0	Wednesday	1718	HybTw		num	1	Wednesday	1718	HybTw		num	0	Wednesday	1718	HybTw		num	1	Wednesday	1718	HybTw		num	0	Wednesday	1718	HybTw		num	0	Wednesday	1718	HybTw		num	0	Wednesday	1718	HybTw
num	0	Wednesday	1718	PlugTw		num	0	Wednesday	1718	PlugTw		num	0	Wednesday	1718	PlugTw		num	0	Wednesday	1718	PlugTw		num	4	Wednesday	1718	PlugTw		num	7	Wednesday	1718	PlugTw		num	19	Wednesday	1718	PlugTw
num	8	Wednesday	1819	ConvBi		num	0	Wednesday	1819	ConvBi		num	5	Wednesday	1819	ConvBi		num	0	Wednesday	1819	ConvBi		num	0	Wednesday	1819	ConvBi		num	0	Wednesday	1819	ConvBi		num	0	Wednesday	1819	ConvBi
num	0	Wednesday	1819	HybAr		num	13	Wednesday	1819	HybAr		num	5	Wednesday	1819	HybAr		num	13	Wednesday	1819	HybAr		num	10	Wednesday	1819	HybAr		num	8	Wednesday	1819	HybAr		num	0	Wednesday	1819	HybAr
num	0	Wednesday	1819	HybTw		num	0	Wednesday	1819	HybTw		num	0	Wednesday	1819	HybTw		num	0	Wednesday	1819	HybTw		num	0	Wednesday	1819	HybTw		num	0	Wednesday	1819	HybTw		num	0	Wednesday	1819	HybTw
num	0	Wednesday	1819	PlugTw		num	0	Wednesday	1819	PlugTw		num	0	Wednesday	1819	PlugTw		num	0	Wednesday	1819	PlugTw		num	5	Wednesday	1819	PlugTw		num	8	Wednesday	1819	PlugTw		num	21	Wednesday	1819	PlugTw
num	8	Wednesday	1920	ConvBi		num	0	Wednesday	1920	ConvBi		num	5	Wednesday	1920	ConvBi		num	0	Wednesday	1920	ConvBi		num	0	Wednesday	1920	ConvBi		num	0	Wednesday	1920	ConvBi		num	0	Wednesday	1920	ConvBi
num	0	Wednesday	1920	HybAr		num	13	Wednesday	1920	HybAr		num	5	Wednesday	1920	HybAr		num	13	Wednesday	1920	HybAr		num	10	Wednesday	1920	HybAr		num	8	Wednesday	1920	HybAr		num	0	Wednesday	1920	HybAr
num	0	Wednesday	1920	HybTw		num	0	Wednesday	1920	HybTw		num	0	Wednesday	1920	HybTw		num	0	Wednesday	1920	HybTw		num	0	Wednesday	1920	HybTw		num	0	Wednesday	1920	HybTw		num	0	Wednesday	1920	HybTw
num	0	Wednesday	1920	PlugTw		num	0	Wednesday	1920	PlugTw		num	0	Wednesday	1920	PlugTw		num	0	Wednesday	1920	PlugTw		num	5	Wednesday	1920	PlugTw		num	8	Wednesday	1920	PlugTw		num	21	Wednesday	1920	PlugTw
num	5	Wednesday	2021	ConvBi		num	0	Wednesday	2021	ConvBi		num	3	Wednesday	2021	ConvBi		num	0	Wednesday	2021	ConvBi		num	0	Wednesday	2021	ConvBi		num	0	Wednesday	2021	ConvBi		num	0	Wednesday	2021	ConvBi
num	0	Wednesday	2021	HybAr		num	7	Wednesday	2021	HybAr		num	3	Wednesday	2021	HybAr		num	8	Wednesday	2021	HybAr		num	5	Wednesday	2021	HybAr		num	5	Wednesday	2021	HybAr		num	0	Wednesday	2021	HybAr
num	0	Wednesday	2021	HybTw		num	1	Wednesday	2021	HybTw		num	1	Wednesday	2021	HybTw		num	1	Wednesday	2021	HybTw		num	0	Wednesday	2021	HybTw		num	0	Wednesday	2021	HybTw		num	0	Wednesday	2021	HybTw
num	0	Wednesday	2021	PlugTw		num	1	Wednesday	2021	PlugTw		num	0	Wednesday	2021	PlugTw		num	0	Wednesday	2021	PlugTw		num	5	Wednesday	2021	PlugTw		num	5	Wednesday	2021	PlugTw		num	14	Wednesday	2021	PlugTw
num	6	Wednesday	2122	ConvBi		num	0	Wednesday	2122	ConvBi		num	4	Wednesday	2122	ConvBi		num	0	Wednesday	2122	ConvBi		num	0	Wednesday	2122	ConvBi		num	0	Wednesday	2122	ConvBi		num	0	Wednesday	2122	ConvBi
num	0	Wednesday	2122	HybAr		num	10	Wednesday	2122	HybAr		num	3	Wednesday	2122	HybAr		num	10	Wednesday	2122	HybAr		num	8	Wednesday	2122	HybAr		num	6	Wednesday	2122	HybAr		num	0	Wednesday	2122	HybAr
num	0	Wednesday	2122	HybTw		num	0	Wednesday	2122	HybTw		num	1	Wednesday	2122	HybTw		num	0	Wednesday	2122	HybTw		num	0	Wednesday	2122	HybTw		num	0	Wednesday	2122	HybTw		num	0	Wednesday	2122	HybTw
num	0	Wednesday	2122	PlugTw		num	0	Wednesday	2122	PlugTw		num	0	Wednesday	2122	PlugTw		num	0	Wednesday	2122	PlugTw		num	3	Wednesday	2122	PlugTw		num	6	Wednesday	2122	PlugTw		num	16	Wednesday	2122	PlugTw
num	5	Wednesday	2223	ConvBi		num	0	Wednesday	2223	ConvBi		num	3	Wednesday	2223	ConvBi		num	0	Wednesday	2223	ConvBi		num	0	Wednesday	2223	ConvBi		num	0	Wednesday	2223	ConvBi		num	0	Wednesday	2223	ConvBi
num	0	Wednesday	2223	HybAr		num	7	Wednesday	2223	HybAr		num	3	Wednesday	2223	HybAr		num	8	Wednesday	2223	HybAr		num	5	Wednesday	2223	HybAr		num	5	Wednesday	2223	HybAr		num	0	Wednesday	2223	HybAr
num	0	Wednesday	2223	HybTw		num	1	Wednesday	2223	HybTw		num	1	Wednesday	2223	HybTw		num	1	Wednesday	2223	HybTw		num	0	Wednesday	2223	HybTw		num	0	Wednesday	2223	HybTw		num	0	Wednesday	2223	HybTw
num	0	Wednesday	2223	PlugTw		num	1	Wednesday	2223	PlugTw		num	0	Wednesday	2223	PlugTw		num	0	Wednesday	2223	PlugTw		num	5	Wednesday	2223	PlugTw		num	5	Wednesday	2223	PlugTw		num	14	Wednesday	2223	PlugTw
num	5	Wednesday	2324	ConvBi		num	0	Wednesday	2324	ConvBi		num	3	Wednesday	2324	ConvBi		num	0	Wednesday	2324	ConvBi		num	0	Wednesday	2324	ConvBi		num	0	Wednesday	2324	ConvBi		num	0	Wednesday	2324	ConvBi
num	0	Wednesday	2324	HybAr		num	7	Wednesday	2324	HybAr		num	3	Wednesday	2324	HybAr		num	8	Wednesday	2324	HybAr		num	5	Wednesday	2324	HybAr		num	5	Wednesday	2324	HybAr		num	0	Wednesday	2324	HybAr
num	0	Wednesday	2324	HybTw		num	1	Wednesday	2324	HybTw		num	1	Wednesday	2324	HybTw		num	1	Wednesday	2324	HybTw		num	0	Wednesday	2324	HybTw		num	0	Wednesday	2324	HybTw		num	0	Wednesday	2324	HybTw
num	0	Wednesday	2324	PlugTw		num	1	Wednesday	2324	PlugTw		num	0	Wednesday	2324	PlugTw		num	0	Wednesday	2324	PlugTw		num	5	Wednesday	2324	PlugTw		num	5	Wednesday	2324	PlugTw		num	14	Wednesday	2324	PlugTw
